# Supplementary material
Source: PubMed Central journal article supplement (PMC9189570)
Supplement: sj-pdf-1-ebm-10.1177_15353702221082929.pdf [file sj-pdf-1-ebm-10.1177_15353702221082929.pdf]

Supplementary Table1. The 32 Immune-related genes

| <b>GSE20907</b>  | <b>logFC</b> | <b>GSE45006</b>   | <b>logFC</b> | <b>Merged</b>    |
|------------------|--------------|-------------------|--------------|------------------|
| <b>(54genes)</b> |              | <b>(246genes)</b> |              | <b>(32genes)</b> |
| Cxcl10           | -1.2787665   | Tnfrsf12a         | 6.342416075  | Agt              |
| Fabp3            | -0.8533805   | S100a8            | 6.449887975  | Fabp3            |
| S1pr1            | -0.7049235   | Vgf               | 3.927269     | S1pr1            |
| Crabp1           | -0.69395625  | Ifitm1            | 6.471016775  | Lgmn             |
| Htr1a            | -0.643363    | Ccl2              | 10.75071248  | Fcer1g           |
| Agt              | -0.62975975  | Slpi              | 9.1036857    | Plxnb2           |
| S100a10          | 0.59725275   | S100a9            | 8.47528155   | Grn              |
| Ctsb             | 0.60175125   | Lcn2              | 9.03615005   | Ctsb             |
| Tlr4             | 0.608656     | Procr             | 3.20508845   | Tyrobp           |
| Masp1            | 0.62046025   | S100a11           | 4.041319925  | Lyn              |
| Igfl             | 0.6614585    | Cd14              | 7.99560965   | Vim              |
| Lgmn             | 0.684163     | Il33              | 3.256177175  | Ptprc            |
| Ptpn6            | 0.7164675    | Ccl7              | 8.50031865   | Ifi30            |
| Tnfrsf1a         | 0.71673475   | Nfkbiz            | 1.801046125  | S100a6           |
| Cxcl14           | 0.745693     | S100a10           | 2.48176325   | Stat3            |
| Lbp              | 0.75857      | Psme2             | 1.201062675  | Tlr4             |
| Lyn              | 0.76091125   | Hck               | 5.20229815   | Tlr2             |
| Btk              | 0.764564     | Fgf11             | 1.293145275  | Tnfrsf1a         |
| Fcer1g           | 0.764785     | Sema6d            | -1.689940475 | Lcp2             |
| Csfl             | 0.7719825    | Il1rap            | 3.08946795   | Gmfg             |
| Fas              | 0.77857625   | Hbegf             | 4.629345175  | Ptpn6            |
| Plxnb2           | 0.808006     | Sdc1              | 4.3658326    | Pf4              |
| Stat3            | 0.89481825   | Psmid8            | 1.414512075  | S100a10          |
| Ifngr1           | 0.904202     | Agt               | -2.04543665  | Cybb             |
| Tyrobp           | 0.91357225   | Plaur             | 2.063822875  | C3ar1            |
| Blnk             | 0.927294     | Cxcl1             | 3.847685925  | Fcgr2b           |
| Cd14             | 0.93145425   | Ppp4c             | 1.188742675  | Fcgr3a           |
| Il7r             | 0.95615475   | Fgf9              | -2.438577775 | S100a11          |
| Cd48             | 0.96100275   | Nr3c2             | -2.034369475 | Hmox1            |
| Csf2rb           | 0.976506     | Il17ra            | 2.291617925  | Cd14             |
| Pf4              | 0.97877625   | Trh               | 4.891422575  | Lcn2             |
| Grn              | 1.0047535    | Il4r              | 2.839389625  | Ccl2             |
| Gmfg             | 1.00501475   | Ctsl              | 1.809824375  |                  |
| C3ar1            | 1.04268      | S1pr1             | -0.91352675  |                  |
| Fcgr3a           | 1.04685875   | Psmid13           | 1.294113425  |                  |
| Calca            | 1.050444     | Manf              | 1.069527225  |                  |
| Lcp2             | 1.07543225   | Psmid4            | 0.691910525  |                  |
| Tlr2             | 1.081872     | Fabp4             | 4.7274115    |                  |
| Ptprc            | 1.146709     | Cntf              | 0.869650475  |                  |
| S100a11          | 1.16122675   | Ccr1              | 4.40856085   |                  |
| Ifi30            | 1.17754575   | Tinag11           | 4.3139559    |                  |
| Csflr            | 1.1874865    | Plscr1            | 0.807753725  |                  |
| Cd4              | 1.2452205    | Apln              | 2.809090775  |                  |
| Hmox1            | 1.28778375   | Aimp1             | 1.174861525  |                  |
| S100a6           | 1.33800075   | Trim27            | 1.3381952    |                  |
| C3               | 1.35432925   | Akt3              | -1.113971575 |                  |
| Tlr7             | 1.4228225    | Fos               | 1.605887625  |                  |
| Cybb             | 1.55334625   | Tnfrsf1a          | 2.08701965   |                  |

---

|        |            |          |              |
|--------|------------|----------|--------------|
| Fcgr2b | 1.6608785  | Psmc3    | 0.747        |
| Vim    | 1.7911145  | Hmox1    | 7.922289275  |
| Ccl2   | 1.81522025 | Ogfr     | 0.789169775  |
| Lcn2   | 1.8365455  | Fabp3    | -1.82476425  |
| Hest   | 2.01355625 | Gmfg     | 2.169749125  |
| Cxcl13 | 2.27547575 | Cdk4     | 1.651369575  |
|        |            | Igf1     | -4.3842781   |
|        |            | Map2k2   | 0.765441725  |
|        |            | Fabp5    | 1.096780225  |
|        |            | Rbp4     | -5.06851475  |
|        |            | Plau     | 3.26074835   |
|        |            | Nfatc2   | -0.8194059   |
|        |            | Socs3    | 4.6727609    |
|        |            | Lgmn     | 0.7774691    |
|        |            | Ndrg1    | -1.466900875 |
|        |            | Ifngr2   | 1.341651325  |
|        |            | Psmd7    | 0.6098554    |
|        |            | Kitlg    | 0.95636095   |
|        |            | Jun      | 1.60644515   |
|        |            | Sema3b   | -1.6571691   |
|        |            | Nfkbib   | 1.217195675  |
|        |            | Sort1    | -1.09392505  |
|        |            | Stat3    | 1.7934193    |
|        |            | Bid      | 0.8699807    |
|        |            | Csk      | 0.8512712    |
|        |            | Fgfl2    | -0.9194011   |
|        |            | Nr2f1    | -0.97389495  |
|        |            | Pgr      | -0.7564067   |
|        |            | Angptl4  | 3.877828875  |
|        |            | Fcgr2b   | 2.750865525  |
|        |            | Sema3c   | 2.192754175  |
|        |            | Chga     | -1.646750175 |
|        |            | Tac1     | 3.524948475  |
|        |            | Cmtm5    | -0.6883895   |
|        |            | Fgf13    | -1.119129    |
|        |            | Psmd3    | 0.813119725  |
|        |            | Cmtm7    | 1.470789775  |
|        |            | Kcnh2    | -0.87291375  |
|        |            | Slc22a17 | -0.73598045  |
|        |            | Ctss     | -1.116066925 |
|        |            | Psmd5    | 0.90869195   |
|        |            | Nras     | 1.042122325  |
|        |            | Gal      | 3.8492663    |
|        |            | Casp3    | 1.9271854    |
|        |            | Il1r2    | 5.0581961    |
|        |            | Mdk      | -0.90262405  |
|        |            | Cxcl2    | 4.54579085   |
|        |            | S100a13  | -0.97841965  |
|        |            | Zyx      | 1.534475825  |
|        |            | Psmd14   | 0.784229625  |
|        |            | Hdac1    | 1.2330456    |

---

---

|           |              |
|-----------|--------------|
| Mapt      | -1.113871725 |
| C3ar1     | 2.6168613    |
| Rbp1      | 5.617855775  |
| Flt1      | 1.255837475  |
| Cx3cl1    | -1.512034675 |
| Inhbb     | -1.8783907   |
| Vegfb     | -1.102308775 |
| Ptn       | -1.81431     |
| Irf9      | 1.1238387    |
| Adcyap1r1 | -1.342854825 |
| Il18      | 1.128884125  |
| C3        | -2.03126085  |
| Trhr      | -1.16749705  |
| Furin     | 1.161774775  |
| Nfkbia    | 1.561294525  |
| Vav1      | 2.4587238    |
| Sdc3      | -1.1026628   |
| Bmp4      | -1.6495149   |
| S100a6    | 1.7212402    |
| Irf3      | 1.316868975  |
| Thra      | -0.697226725 |
| Ucn2      | 3.359089325  |
| Rabep1    | -0.60130485  |
| Tlr2      | 1.9641849    |
| Esrrg     | -2.64442475  |
| Cmtm6     | 1.5700987    |
| Nampt     | 1.141506225  |
| Ednrb     | -1.11760045  |
| Pik3r3    | -1.1579597   |
| S100a1    | -0.695144425 |
| Bcl10     | 1.1362543    |
| Fgfr3     | -0.869297475 |
| Nfya      | 0.74505765   |
| Fabp7     | -1.210403375 |
| Ptgds     | -1.733037175 |
| Tfrc      | 0.9315101    |
| Rasgrp3   | -1.432559025 |
| Vtn       | -4.85518335  |
| Icam1     | 2.633755975  |
| Bcl3      | 0.888013475  |
| Rac2      | 2.226035625  |
| Tgfb2     | -1.063020125 |
| Map2k1    | 0.599491175  |
| Aplnr     | -1.263341775 |
| Rhoa      | 1.004070575  |
| Igf2      | -1.15432775  |
| Eed       | 0.895777475  |
| Adrm1     | 0.65509575   |
| Lyn       | 1.2070316    |
| Il6r      | 1.0640093    |
| Lrsam1    | -0.940591375 |

---

---

|           |              |
|-----------|--------------|
| Pak2      | 0.629685075  |
| Colec12   | -3.93460165  |
| Cblb      | 2.312739075  |
| Nrg1      | -1.089506625 |
| Fgfr1     | 1.011826375  |
| Inhba     | 1.374820475  |
| Ltbr      | 1.889511125  |
| Vim       | 1.266482825  |
| Adm       | 1.2842977    |
| Ifi30     | 1.633259125  |
| Bmp1      | 0.745281475  |
| Ccl4      | 2.254940325  |
| Tnfrsf11b | -2.644151775 |
| Cspg5     | -1.655204375 |
| Mapk14    | 0.7796278    |
| Bmp2      | 3.5561686    |
| Adrb2     | -0.830843375 |
| Tgfb3     | 2.9169843    |
| Hdgf      | 1.38090305   |
| Lcp2      | 2.112134125  |
| Fyn       | 0.742468975  |
| Fgf1      | -1.2591427   |
| Ngfr      | 1.17533485   |
| Tlr4      | 1.949129825  |
| Gbp2      | 1.150594875  |
| Bdnf      | 1.045547925  |
| Ltbp3     | -1.15049995  |
| Tgfbr2    | 0.8947434    |
| Cck       | -0.652489975 |
| Cmtm3     | 1.13227055   |
| Sh3bp2    | 1.400317175  |
| Ptgs2     | 1.89113165   |
| Ap3b1     | 0.648305425  |
| Ptpn6     | 2.4274416    |
| Bst2      | 1.380615     |
| Akt2      | 0.7831182    |
| Raf1      | 0.6857794    |
| Bmp6      | -1.836321225 |
| Clefl     | 1.652384875  |
| Pf4       | 2.43515005   |
| Ebi3      | 0.6217301    |
| Prkca     | -0.654240825 |
| Il6       | 3.19100695   |
| Fcgr3a    | 2.90463375   |
| Psm1      | 0.6392132    |
| Ctsb      | 0.9497628    |
| Chgb      | -0.888653375 |
| Fgr       | 2.46702445   |
| Csf3r     | 2.514020825  |
| Bmpr1a    | -1.0956696   |
| Plxnb2    | 0.832789275  |

---

---

|         |              |
|---------|--------------|
| Ccl3    | 2.592917325  |
| Irf1    | 0.9241385    |
| Cat     | -0.715960075 |
| Il11    | 2.377157125  |
| Sdc4    | 0.591322725  |
| Pdgfra  | -1.495722775 |
| Angpt1  | -0.817076275 |
| Itgal   | 0.900448     |
| Tgfbr1  | -1.400005325 |
| Cdh1    | -0.5879394   |
| Vip     | 2.544718425  |
| Ccl27   | -0.735739375 |
| Rsad2   | 2.381131     |
| Cybb    | 2.5797895    |
| Calca   | -0.68611695  |
| Fgf2    | 1.088115725  |
| Itgb2   | 2.20607185   |
| Cxcl3   | 0.754549075  |
| Olr1    | 1.819337675  |
| Rfx5    | -0.766311725 |
| Flt3    | -0.810755725 |
| Pmp2    | 0.86633475   |
| Tyrobp  | 1.06885245   |
| Ptpnc   | 1.5982528    |
| Mmp12   | 1.733187175  |
| Shc1    | 1.1002178    |
| Aen     | 0.74445825   |
| Pak4    | 1.095406425  |
| Gm      | 0.90292515   |
| Pdyn    | 1.750274975  |
| Ctse    | -0.65439725  |
| Crh     | 2.221238275  |
| Fcer1g  | 0.79637105   |
| Ltb     | 1.6298249    |
| Tgfb1   | 1.248357475  |
| Adipor2 | 0.888427125  |
| Nr2f2   | -1.05064205  |
| Il10rb  | 1.14826265   |
| Tapbp   | 0.79440715   |
| Irf7    | 1.065586375  |
| Cldn4   | 1.1166138    |
| Rela    | 0.8796661    |
| Psmb8   | 1.186608075  |
| Il1b    | 1.742730375  |
| Cd4     | -0.839647875 |

---

Supplementary Table2. The details for actual gene IDs and GO descriptions

| ONTOLO<br>GY | ID             | Description                                                                           | GeneRat<br>io | BgRatio       | pvalue   | p.adjust | qvalue   | geneID                                                                           | Cou<br>nt |
|--------------|----------------|---------------------------------------------------------------------------------------|---------------|---------------|----------|----------|----------|----------------------------------------------------------------------------------|-----------|
| BP           | GO:00421<br>19 | neutrophil activation                                                                 | 14/32         | 498/186<br>70 | 2.34E-14 | 4.54E-11 | 2.08E-11 | FCER1G/GRN/CTSB/TYROBP/PTPRC/TLR2/GMFG/PTPN6/CYBB/C3AR1/FCGR2B/S100A11/CD14/LCN2 | 14        |
| BP           | GO:00433<br>12 | neutrophil degranulation                                                              | 13/32         | 485/186<br>70 | 4.63E-13 | 3.22E-10 | 1.48E-10 | FCER1G/GRN/CTSB/TYROBP/PTPRC/TLR2/GMFG/PTPN6/CYBB/C3AR1/S100A11/CD14/LCN2        | 13        |
| BP           | GO:00022<br>83 | neutrophil activation<br>involved in immune<br>response                               | 13/32         | 488/186<br>70 | 5.01E-13 | 3.22E-10 | 1.48E-10 | FCER1G/GRN/CTSB/TYROBP/PTPRC/TLR2/GMFG/PTPN6/CYBB/C3AR1/S100A11/CD14/LCN2        | 13        |
| BP           | GO:00024<br>46 | neutrophil mediated<br>immunity                                                       | 13/32         | 499/186<br>70 | 6.65E-13 | 3.22E-10 | 1.48E-10 | FCER1G/GRN/CTSB/TYROBP/PTPRC/TLR2/GMFG/PTPN6/CYBB/C3AR1/S100A11/CD14/LCN2        | 13        |
| BP           | GO:00327<br>60 | positive regulation of<br>tumor necrosis factor<br>production                         | 8/32          | 86/1867<br>0  | 1.40E-12 | 5.41E-10 | 2.49E-10 | FCER1G/TYROBP/PTPRC/TLR4/TLR2/PF4/CYBB/CD14                                      | 8         |
| BP           | GO:19035<br>57 | positive regulation of<br>tumor necrosis factor<br>superfamily cytokine<br>production | 8/32          | 88/1867<br>0  | 1.69E-12 | 5.45E-10 | 2.50E-10 | FCER1G/TYROBP/PTPRC/TLR4/TLR2/PF4/CYBB/CD14                                      | 8         |
| BP           | GO:00326<br>80 | regulation of tumor<br>necrosis factor<br>production                                  | 9/32          | 160/186<br>70 | 4.71E-12 | 1.18E-09 | 5.43E-10 | FCER1G/TYROBP/PTPRC/TLR4/TLR2/PTPN6/PF4/CYBB/CD14                                | 9         |
| BP           | GO:00326<br>40 | tumor necrosis factor<br>production                                                   | 9/32          | 163/186<br>70 | 5.57E-12 | 1.18E-09 | 5.43E-10 | FCER1G/TYROBP/PTPRC/TLR4/TLR2/PTPN6/PF4/CYBB/CD14                                | 9         |
| BP           | GO:19035<br>55 | regulation of tumor<br>necrosis factor<br>superfamily cytokine<br>production          | 9/32          | 163/186<br>70 | 5.57E-12 | 1.18E-09 | 5.43E-10 | FCER1G/TYROBP/PTPRC/TLR4/TLR2/PTPN6/PF4/CYBB/CD14                                | 9         |
| BP           | GO:00026<br>83 | negative regulation of<br>immune system process                                       | 12/32         | 463/186<br>70 | 6.76E-12 | 1.18E-09 | 5.43E-10 | FCER1G/GRN/TYROBP/LYN/PTPRC/TLR4/PTPN6/PF4/FCGR2B/HMOX1/CD14/CCL2                | 12        |
| BP           | GO:00018<br>19 | positive regulation of<br>cytokine production                                         | 12/32         | 464/186<br>70 | 6.94E-12 | 1.18E-09 | 5.43E-10 | AGT/FCER1G/TYROBP/PTPRC/STAT3/TLR4/TLR2/PF4/CYBB/C3AR1/HMOX1/CD14                | 12        |
| BP           | GO:00717<br>06 | tumor necrosis factor<br>superfamily cytokine<br>production                           | 9/32          | 168/186<br>70 | 7.32E-12 | 1.18E-09 | 5.43E-10 | FCER1G/TYROBP/PTPRC/TLR4/TLR2/PTPN6/PF4/CYBB/CD14                                | 9         |
| BP           | GO:00712<br>19 | cellular response to<br>molecule of bacterial<br>origin                               | 9/32          | 212/186<br>70 | 5.92E-11 | 8.83E-09 | 4.06E-09 | LYN/VIM/TLR4/TLR2/PF4/FCGR2B/CD14/LCN2/CCL2                                      | 9         |
| BP           | GO:00712<br>16 | cellular response to<br>biotic stimulus                                               | 9/32          | 236/186<br>70 | 1.54E-10 | 2.13E-08 | 9.80E-09 | LYN/VIM/TLR4/TLR2/PF4/FCGR2B/CD14/LCN2/CCL2                                      | 9         |
| BP           | GO:00069<br>09 | phagocytosis                                                                          | 10/32         | 369/186<br>70 | 3.53E-10 | 4.56E-08 | 2.10E-08 | FCER1G/TYROBP/LYN/PTPRC/TLR4/TLR2/FCGR2B/FCGR3A/CD14/CCL2                        | 10        |
| BP           | GO:00421<br>08 | positive regulation of<br>cytokine biosynthetic<br>process                            | 6/32          | 67/1867<br>0  | 1.43E-09 | 1.73E-07 | 7.96E-08 | TYROBP/PTPRC/STAT3/TLR4/CYBB/HMOX1                                               | 6         |

Supplementary Table2. The details for actual gene IDs and GO descriptions

|    |          |                                                      |       |               |          |          |          |                                                          |    |
|----|----------|------------------------------------------------------|-------|---------------|----------|----------|----------|----------------------------------------------------------|----|
| BP | GO:00712 | cellular response to lipopolysaccharide              | 8/32  | 205/186<br>70 | 1.55E-09 | 1.76E-07 | 8.10E-08 | LYN/VIM/TLR4/TLR2/PF4/CD14/LCN2/CCL2                     | 8  |
| BP | GO:00321 | positive regulation of response to external stimulus | 9/32  | 323/186<br>70 | 2.46E-09 | 2.56E-07 | 1.18E-07 | AGT/S1PR1/LGMN/FCER1G/GRN/TLR4/TLR2/TNFRSF1A/C3AR1       | 9  |
| BP | GO:00450 | regulation of innate immune response                 | 10/32 | 452/186<br>70 | 2.51E-09 | 2.56E-07 | 1.18E-07 | LGMN/FCER1G/GRN/CTSB/LYN/TLR4/TLR2/PTPN6/FCGR2B/CD14     | 10 |
| BP | GO:00022 | response to molecule of bacterial origin             | 9/32  | 343/186<br>70 | 4.15E-09 | 4.02E-07 | 1.85E-07 | LYN/VIM/TLR4/TLR2/PF4/FCGR2B/CD14/LCN2/CCL2              | 9  |
| BP | GO:00507 | regulation of inflammatory response                  | 10/32 | 485/186<br>70 | 4.93E-09 | 4.55E-07 | 2.09E-07 | AGT/FCER1G/GRN/LYN/PTPRC/TLR4/TLR2/TNFRSF1A/C3AR1/FCGR2B | 10 |
| BP | GO:00421 | macrophage activation                                | 6/32  | 95/1867<br>0  | 1.20E-08 | 1.06E-06 | 4.88E-07 | GRN/TYROBP/PTPRC/TLR4/TLR2/FCGR2B                        | 6  |
| BP | GO:00026 | negative regulation of leukocyte activation          | 7/32  | 175/186<br>70 | 1.56E-08 | 1.31E-06 | 6.03E-07 | GRN/TYROBP/LYN/PTPRC/PTPN6/FCGR2B/HMOX1                  | 7  |
| BP | GO:00326 | regulation of interleukin-10 production              | 5/32  | 52/1867<br>0  | 2.62E-08 | 2.11E-06 | 9.71E-07 | FCER1G/TYROBP/TLR4/TLR2/FCGR2B                           | 5  |
| BP | GO:00326 | interleukin-10 production                            | 5/32  | 55/1867<br>0  | 3.49E-08 | 2.69E-06 | 1.24E-06 | FCER1G/TYROBP/TLR4/TLR2/FCGR2B                           | 5  |
| BP | GO:00420 | regulation of cytokine biosynthetic process          | 6/32  | 114/186<br>70 | 3.61E-08 | 2.69E-06 | 1.24E-06 | TYROBP/PTPRC/STAT3/TLR4/CYBB/HMOX1                       | 6  |
| BP | GO:00508 | negative regulation of cell activation               | 7/32  | 199/186<br>70 | 3.78E-08 | 2.71E-06 | 1.25E-06 | GRN/TYROBP/LYN/PTPRC/PTPN6/FCGR2B/HMOX1                  | 7  |
| BP | GO:00027 | regulation of leukocyte mediated immunity            | 7/32  | 201/186<br>70 | 4.05E-08 | 2.80E-06 | 1.29E-06 | FCER1G/LYN/PTPRC/TLR4/PTPN6/FCGR2B/HMOX1                 | 7  |
| BP | GO:19012 | regulation of neuron death                           | 8/32  | 313/186<br>70 | 4.23E-08 | 2.83E-06 | 1.30E-06 | LGMN/GRN/TYROBP/STAT3/TLR4/FCGR2B/HMOX1/CCL2             | 8  |
| BP | GO:00316 | lipopolysaccharide-mediated signaling pathway        | 5/32  | 58/1867<br>0  | 4.58E-08 | 2.96E-06 | 1.36E-06 | LYN/TLR4/TLR2/CD14/CCL2                                  | 5  |
| BP | GO:00026 | regulation of immune effector process                | 9/32  | 458/186<br>70 | 5.05E-08 | 3.16E-06 | 1.45E-06 | FCER1G/GRN/LYN/PTPRC/TLR4/PTPN6/C3AR1/FCGR2B/HMOX1       | 9  |
| BP | GO:00420 | cytokine biosynthetic process                        | 6/32  | 123/186<br>70 | 5.70E-08 | 3.41E-06 | 1.57E-06 | TYROBP/PTPRC/STAT3/TLR4/CYBB/HMOX1                       | 6  |
| BP | GO:00308 | regulation of B cell proliferation                   | 5/32  | 61/1867<br>0  | 5.93E-08 | 3.41E-06 | 1.57E-06 | TYROBP/LYN/PTPRC/TLR4/FCGR2B                             | 5  |
| BP | GO:00421 | cytokine metabolic process                           | 6/32  | 124/186<br>70 | 5.98E-08 | 3.41E-06 | 1.57E-06 | TYROBP/PTPRC/STAT3/TLR4/CYBB/HMOX1                       | 6  |
| BP | GO:00324 | response to lipopolysaccharide                       | 8/32  | 330/186<br>70 | 6.36E-08 | 3.52E-06 | 1.62E-06 | LYN/VIM/TLR4/TLR2/PF4/CD14/LCN2/CCL2                     | 8  |
| BP | GO:00714 | cellular response to external stimulus               | 8/32  | 339/186<br>70 | 7.83E-08 | 4.22E-06 | 1.94E-06 | AGT/LYN/PTPRC/TLR4/TNFRSF1A/CYBB/HMOX1/LCN2              | 8  |
| BP | GO:00305 | leukocyte chemotaxis                                 | 7/32  | 224/186<br>70 | 8.50E-08 | 4.45E-06 | 2.05E-06 | S1PR1/LGMN/FCER1G/LYN/PF4/C3AR1/CCL2                     | 7  |

Supplementary Table2. The details for actual gene IDs and GO descriptions

|    |                |                                                             |      |               |          |          |          |                                                  |   |
|----|----------------|-------------------------------------------------------------|------|---------------|----------|----------|----------|--------------------------------------------------|---|
| BP | GO:00709<br>97 | neuron death                                                | 8/32 | 348/186<br>70 | 9.57E-08 | 4.88E-06 | 2.24E-06 | LGMN/GRN/TYROBP/STAT3/TLR4/FCGR2B/HMOX1/CCL2     | 8 |
| BP | GO:00509<br>00 | leukocyte migration                                         | 9/32 | 499/186<br>70 | 1.05E-07 | 5.22E-06 | 2.40E-06 | S1PR1/LGMN/FCER1G/LYN/PTPN6/PF4/C3AR1/HMOX1/CCL2 | 9 |
| BP | GO:00506<br>63 | cytokine secretion                                          | 7/32 | 240/186<br>70 | 1.36E-07 | 6.59E-06 | 3.03E-06 | AGT/LYN/TLR4/TLR2/LCP2/FCGR2B/CD14               | 7 |
| BP | GO:00022<br>24 | toll-like receptor<br>signaling pathway                     | 6/32 | 146/186<br>70 | 1.58E-07 | 7.48E-06 | 3.43E-06 | LGMN/CTSB/LYN/TLR4/TLR2/CD14                     | 6 |
| BP | GO:00507<br>77 | negative regulation of<br>immune response                   | 6/32 | 150/186<br>70 | 1.86E-07 | 8.57E-06 | 3.93E-06 | GRN/LYN/PTPRC/PTPN6/FCGR2B/HMOX1                 | 6 |
| BP | GO:00326<br>75 | regulation of<br>interleukin-6 production                   | 6/32 | 152/186<br>70 | 2.01E-07 | 8.99E-06 | 4.13E-06 | FCER1G/TYROBP/STAT3/TLR4/TLR2/PTPN6              | 6 |
| BP | GO:00301<br>68 | platelet activation                                         | 6/32 | 153/186<br>70 | 2.09E-07 | 8.99E-06 | 4.13E-06 | FCER1G/LYN/TLR4/LCP2/PTPN6/PF4                   | 6 |
| BP | GO:00507<br>29 | positive regulation of<br>inflammatory response             | 6/32 | 153/186<br>70 | 2.09E-07 | 8.99E-06 | 4.13E-06 | AGT/FCER1G/GRN/TLR4/TLR2/TNFRSF1A                | 6 |
| BP | GO:00072<br>59 | JAK-STAT cascade                                            | 6/32 | 156/186<br>70 | 2.34E-07 | 9.86E-06 | 4.53E-06 | AGT/LYN/PTPRC/STAT3/TNFRSF1A/CCL2                | 6 |
| BP | GO:00326<br>35 | interleukin-6 production                                    | 6/32 | 161/186<br>70 | 2.82E-07 | 1.16E-05 | 5.34E-06 | FCER1G/TYROBP/STAT3/TLR4/TLR2/PTPN6              | 6 |
| BP | GO:19021<br>05 | regulation of leukocyte<br>differentiation                  | 7/32 | 272/186<br>70 | 3.18E-07 | 1.28E-05 | 5.90E-06 | TYROBP/LYN/PTPRC/TLR4/PTPN6/PF4/FCGR2B           | 7 |
| BP | GO:00976<br>96 | STAT cascade                                                | 6/32 | 166/186<br>70 | 3.38E-07 | 1.34E-05 | 6.14E-06 | AGT/LYN/PTPRC/STAT3/TNFRSF1A/CCL2                | 6 |
| BP | GO:00300<br>99 | myeloid cell<br>differentiation                             | 8/32 | 416/186<br>70 | 3.74E-07 | 1.45E-05 | 6.66E-06 | FCER1G/TYROBP/LYN/STAT3/TLR4/TLR2/PTPN6/PF4      | 8 |
| BP | GO:00420<br>63 | gliogenesis                                                 | 7/32 | 290/186<br>70 | 4.90E-07 | 1.86E-05 | 8.55E-06 | GRN/LYN/VIM/STAT3/TLR4/TLR2/CCL2                 | 7 |
| BP | GO:00703<br>91 | response to lipoteichoic<br>acid                            | 3/32 | 10/1867<br>0  | 5.44E-07 | 1.99E-05 | 9.14E-06 | TLR4/TLR2/CD14                                   | 3 |
| BP | GO:00712<br>23 | cellular response to<br>lipoteichoic acid                   | 3/32 | 10/1867<br>0  | 5.44E-07 | 1.99E-05 | 9.14E-06 | TLR4/TLR2/CD14                                   | 3 |
| BP | GO:00421<br>00 | B cell proliferation                                        | 5/32 | 95/1867<br>0  | 5.54E-07 | 1.99E-05 | 9.14E-06 | TYROBP/LYN/PTPRC/TLR4/FCGR2B                     | 5 |
| BP | GO:00327<br>55 | positive regulation of<br>interleukin-6 production          | 5/32 | 96/1867<br>0  | 5.84E-07 | 2.04E-05 | 9.35E-06 | FCER1G/TYROBP/STAT3/TLR4/TLR2                    | 5 |
| BP | GO:00027<br>58 | innate immune<br>response-activating<br>signal transduction | 7/32 | 298/186<br>70 | 5.88E-07 | 2.04E-05 | 9.35E-06 | LGMN/FCER1G/CTSB/LYN/TLR4/TLR2/CD14              | 7 |
| BP | GO:00508<br>64 | regulation of B cell<br>activation                          | 6/32 | 184/186<br>70 | 6.18E-07 | 2.10E-05 | 9.66E-06 | TYROBP/LYN/PTPRC/TLR4/PTPN6/FCGR2B               | 6 |
| BP | GO:00507<br>64 | regulation of<br>phagocytosis                               | 5/32 | 98/1867<br>0  | 6.47E-07 | 2.16E-05 | 9.93E-06 | FCER1G/PTPRC/TLR2/FCGR2B/CCL2                    | 5 |
| BP | GO:00603       | cell chemotaxis                                             | 7/32 | 304/186       | 6.72E-07 | 2.21E-05 | 1.01E-05 | S1PR1/LGMN/FCER1G/LYN/PF4/C3AR1/CCL2             | 7 |



Supplementary Table2. The details for actual gene IDs and GO descriptions

|    |          |                                                                    |      |         |          |          |          |                                                 |  |   |
|----|----------|--------------------------------------------------------------------|------|---------|----------|----------|----------|-------------------------------------------------|--|---|
|    | 26       |                                                                    |      | 70      |          |          |          |                                                 |  |   |
|    |          | regulation of humoral                                              |      |         |          |          |          |                                                 |  |   |
| BP | GO:00029 | immune response                                                    | 3/32 | 11/1867 | 7.48E-07 | 2.42E-05 | 1.11E-05 | PTPRC/PTPN6/FCGR2B                              |  | 3 |
|    | 23       | mediated by circulating immunoglobulin                             |      | 0       |          |          |          |                                                 |  |   |
|    |          | pattern recognition                                                |      |         |          |          |          |                                                 |  |   |
| BP | GO:00022 | receptor signaling pathway                                         | 6/32 | 197/186 | 9.22E-07 | 2.90E-05 | 1.33E-05 | LGMN/CTSB/LYN/TLR4/TLR2/CD14                    |  | 6 |
|    | 21       |                                                                    |      | 70      |          |          |          |                                                 |  |   |
|    |          | activation of innate immune response                               |      |         |          |          |          |                                                 |  |   |
| BP | GO:00022 |                                                                    | 7/32 | 319/186 | 9.28E-07 | 2.90E-05 | 1.33E-05 | LGMN/FCER1G/CTSB/LYN/TLR4/TLR2/CD14             |  | 7 |
|    | 18       |                                                                    |      | 70      |          |          |          |                                                 |  |   |
|    |          | immune response-activating cell surface receptor signaling pathway |      |         |          |          |          |                                                 |  |   |
| BP | GO:00024 |                                                                    | 8/32 | 473/186 | 9.86E-07 | 3.03E-05 | 1.39E-05 | FCER1G/LYN/PTPRC/LCP2/PTPN6/C3AR1/FCGR2B/FCGR3A |  | 8 |
|    | 29       |                                                                    |      | 70      |          |          |          |                                                 |  |   |
|    |          | regulation of hemopoiesis                                          |      |         |          |          |          |                                                 |  |   |
| BP | GO:19037 |                                                                    | 8/32 | 475/186 | 1.02E-06 | 3.08E-05 | 1.42E-05 | TYROBP/LYN/PTPRC/STAT3/TLR4/PTPN6/PF4/FCGR2B    |  | 8 |
|    | 06       |                                                                    |      | 70      |          |          |          |                                                 |  |   |
|    |          | regulation of leukocyte degranulation                              |      |         |          |          |          |                                                 |  |   |
| BP | GO:00433 |                                                                    | 4/32 | 46/1867 | 1.10E-06 | 3.29E-05 | 1.51E-05 | FCER1G/LYN/FCGR2B/HMOX1                         |  | 4 |
|    | 00       |                                                                    |      | 0       |          |          |          |                                                 |  |   |
|    |          | myeloid leukocyte differentiation                                  |      |         |          |          |          |                                                 |  |   |
| BP | GO:00025 |                                                                    | 6/32 | 204/186 | 1.13E-06 | 3.32E-05 | 1.53E-05 | FCER1G/TYROBP/LYN/TLR4/TLR2/PF4                 |  | 6 |
|    | 73       |                                                                    |      | 70      |          |          |          |                                                 |  |   |
|    |          | regulation of lymphocyte proliferation                             |      |         |          |          |          |                                                 |  |   |
| BP | GO:00506 |                                                                    | 6/32 | 208/186 | 1.27E-06 | 3.63E-05 | 1.67E-05 | TYROBP/LYN/PTPRC/TLR4/PTPN6/FCGR2B              |  | 6 |
|    | 70       |                                                                    |      | 70      |          |          |          |                                                 |  |   |
|    |          | regulation of mononuclear cell proliferation                       |      |         |          |          |          |                                                 |  |   |
| BP | GO:00329 |                                                                    | 6/32 | 209/186 | 1.30E-06 | 3.63E-05 | 1.67E-05 | TYROBP/LYN/PTPRC/TLR4/PTPN6/FCGR2B              |  | 6 |
|    | 44       |                                                                    |      | 70      |          |          |          |                                                 |  |   |
|    |          | microglial cell activation                                         |      |         |          |          |          |                                                 |  |   |
| BP | GO:00017 |                                                                    | 4/32 | 48/1867 | 1.31E-06 | 3.63E-05 | 1.67E-05 | GRN/TYROBP/PTPRC/TLR2                           |  | 4 |
|    | 74       |                                                                    |      | 0       |          |          |          |                                                 |  |   |
|    |          | leukocyte activation involved in inflammatory response             |      |         |          |          |          |                                                 |  |   |
| BP | GO:00022 |                                                                    | 4/32 | 48/1867 | 1.31E-06 | 3.63E-05 | 1.67E-05 | GRN/TYROBP/PTPRC/TLR2                           |  | 4 |
|    | 69       |                                                                    |      | 0       |          |          |          |                                                 |  |   |
|    |          | myeloid leukocyte migration                                        |      |         |          |          |          |                                                 |  |   |
| BP | GO:00975 |                                                                    | 6/32 | 210/186 | 1.34E-06 | 3.66E-05 | 1.68E-05 | LGMN/FCER1G/LYN/PF4/C3AR1/CCL2                  |  | 6 |
|    | 29       |                                                                    |      | 70      |          |          |          |                                                 |  |   |
|    |          | negative regulation of leukocyte mediated immunity                 |      |         |          |          |          |                                                 |  |   |
| BP | GO:00027 |                                                                    | 4/32 | 49/1867 | 1.43E-06 | 3.84E-05 | 1.76E-05 | PTPRC/PTPN6/FCGR2B/HMOX1                        |  | 4 |
|    | 04       |                                                                    |      | 0       |          |          |          |                                                 |  |   |
|    |          | glial cell development                                             |      |         |          |          |          |                                                 |  |   |
| BP | GO:00217 |                                                                    | 5/32 | 116/186 | 1.50E-06 | 3.97E-05 | 1.82E-05 | GRN/LYN/VIM/TLR4/TLR2                           |  | 5 |
|    | 82       |                                                                    |      | 70      |          |          |          |                                                 |  |   |
|    |          | glial cell differentiation                                         |      |         |          |          |          |                                                 |  |   |
| BP | GO:00100 |                                                                    | 6/32 | 218/186 | 1.66E-06 | 4.28E-05 | 1.97E-05 | GRN/LYN/VIM/STAT3/TLR4/TLR2                     |  | 6 |
|    | 01       |                                                                    |      | 70      |          |          |          |                                                 |  |   |
|    |          | regulation of B cell mediated immunity                             |      |         |          |          |          |                                                 |  |   |
| BP | GO:00027 |                                                                    | 4/32 | 51/1867 | 1.68E-06 | 4.28E-05 | 1.97E-05 | FCER1G/PTPRC/PTPN6/FCGR2B                       |  | 4 |
|    | 12       |                                                                    |      | 0       |          |          |          |                                                 |  |   |
|    |          | regulation of immunoglobulin mediated immune response              |      |         |          |          |          |                                                 |  |   |
| BP | GO:00028 |                                                                    | 4/32 | 51/1867 | 1.68E-06 | 4.28E-05 | 1.97E-05 | FCER1G/PTPRC/PTPN6/FCGR2B                       |  | 4 |
|    | 89       |                                                                    |      | 0       |          |          |          |                                                 |  |   |

Supplementary Table2. The details for actual gene IDs and GO descriptions

|    |          |                                                                         |      |               |          |          |          |                                         |   |
|----|----------|-------------------------------------------------------------------------|------|---------------|----------|----------|----------|-----------------------------------------|---|
| BP | GO:00026 | negative regulation of<br>immune effector process                       | 5/32 | 120/186<br>70 | 1.77E-06 | 4.45E-05 | 2.04E-05 | GRN/PTPRC/PTPN6/FCGR2B/HMOX1            | 5 |
| BP | GO:00706 | regulation of leukocyte<br>proliferation                                | 6/32 | 222/186<br>70 | 1.85E-06 | 4.60E-05 | 2.11E-05 | TYROBP/LYN/PTPRC/TLR4/PTPN6/FCGR2B      | 6 |
| BP | GO:00069 | humoral immune<br>response                                              | 7/32 | 356/186<br>70 | 1.93E-06 | 4.72E-05 | 2.17E-05 | PTPRC/PTPN6/PF4/C3AR1/FCGR2B/LCN2/CCL2  | 7 |
| BP | GO:00971 | extrinsic apoptotic<br>signaling pathway                                | 6/32 | 224/186<br>70 | 1.95E-06 | 4.72E-05 | 2.17E-05 | AGT/PTPRC/TNFRSF1A/PF4/HMOX1/LCN2       | 6 |
| BP | GO:00517 | positive regulation of<br>nitric-oxide synthase<br>biosynthetic process | 3/32 | 15/1867<br>0  | 2.05E-06 | 4.91E-05 | 2.26E-05 | TLR4/TLR2/CCL2                          | 3 |
| BP | GO:00028 | regulation of myeloid<br>leukocyte mediated<br>immunity                 | 4/32 | 55/1867<br>0  | 2.28E-06 | 5.33E-05 | 2.45E-05 | FCER1G/LYN/FCGR2B/HMOX1                 | 4 |
| BP | GO:00430 | regulation of<br>macrophage activation                                  | 4/32 | 55/1867<br>0  | 2.28E-06 | 5.33E-05 | 2.45E-05 | GRN/PTPRC/TLR4/FCGR2B                   | 4 |
| BP | GO:00308 | negative regulation of B<br>cell proliferation                          | 3/32 | 16/1867<br>0  | 2.52E-06 | 5.75E-05 | 2.64E-05 | TYROBP/LYN/FCGR2B                       | 3 |
| BP | GO:00430 | negative regulation of<br>macrophage activation                         | 3/32 | 16/1867<br>0  | 2.52E-06 | 5.75E-05 | 2.64E-05 | GRN/PTPRC/FCGR2B                        | 3 |
| BP | GO:00619 | glial cell activation                                                   | 4/32 | 58/1867<br>0  | 2.83E-06 | 6.37E-05 | 2.93E-05 | GRN/TYROBP/PTPRC/TLR2                   | 4 |
| BP | GO:00026 | positive regulation of<br>leukocyte activation                          | 7/32 | 380/186<br>70 | 2.97E-06 | 6.55E-05 | 3.01E-05 | FCER1G/TYROBP/LYN/PTPRC/TLR4/PTPN6/CCL2 | 7 |
| BP | GO:00380 | Fc receptor signaling<br>pathway                                        | 6/32 | 241/186<br>70 | 2.97E-06 | 6.55E-05 | 3.01E-05 | FCER1G/LYN/PTPRC/LCP2/FCGR2B/FCGR3A     | 6 |
| BP | GO:00450 | positive regulation of<br>innate immune response                        | 7/32 | 381/186<br>70 | 3.02E-06 | 6.59E-05 | 3.03E-05 | LGMN/FCER1G/CTSB/LYN/TLR4/TLR2/CD14     | 7 |
| BP | GO:00457 | regulation of<br>angiogenesis                                           | 7/32 | 383/186<br>70 | 3.13E-06 | 6.74E-05 | 3.10E-05 | AGT/GRN/STAT3/PF4/CYBB/C3AR1/HMOX1      | 7 |
| BP | GO:19016 | cellular response to<br>peptide                                         | 7/32 | 385/186<br>70 | 3.24E-06 | 6.83E-05 | 3.14E-05 | AGT/LGMN/LYN/VIM/STAT3/TLR4/FCGR2B      | 7 |
| BP | GO:00455 | mast cell activation                                                    | 4/32 | 60/1867<br>0  | 3.24E-06 | 6.83E-05 | 3.14E-05 | FCER1G/LYN/LCP2/HMOX1                   | 4 |
| BP | GO:00464 | regulation of JAK-STAT<br>cascade                                       | 5/32 | 137/186<br>70 | 3.40E-06 | 7.08E-05 | 3.25E-05 | AGT/LYN/PTPRC/STAT3/TNFRSF1A            | 5 |
| BP | GO:00027 | regulation of production<br>of molecular mediator of<br>immune response | 5/32 | 139/186<br>70 | 3.65E-06 | 7.52E-05 | 3.45E-05 | FCER1G/PTPRC/TLR4/FCGR2B/HMOX1          | 5 |
| BP | GO:00508 | positive regulation of<br>cell activation                               | 7/32 | 394/186<br>70 | 3.77E-06 | 7.70E-05 | 3.54E-05 | FCER1G/TYROBP/LYN/PTPRC/TLR4/PTPN6/CCL2 | 7 |
| BP | GO:00380 | Fc-gamma receptor<br>signaling pathway                                  | 5/32 | 142/186<br>70 | 4.05E-06 | 8.18E-05 | 3.75E-05 | FCER1G/LYN/PTPRC/FCGR2B/FCGR3A          | 5 |
| BP | GO:00507 | regulation of                                                           | 6/32 | 256/186       | 4.21E-06 | 8.42E-05 | 3.87E-05 | AGT/LYN/PTPRC/STAT3/TNFRSF1A/PTPN6      | 6 |

Supplementary Table2. The details for actual gene IDs and GO descriptions

|    |          |                                            |      |         |          |           |          |                                    |  |  |   |
|----|----------|--------------------------------------------|------|---------|----------|-----------|----------|------------------------------------|--|--|---|
|    | 30       | peptidyl-tyrosine phosphorylation          |      | 70      |          |           |          |                                    |  |  |   |
|    |          | regulation of antigen                      |      | 65/1867 |          |           |          |                                    |  |  |   |
| BP | GO:00508 | receptor-mediated signaling pathway        | 4/32 | 0       | 4.47E-06 | 8.78E-05  | 4.03E-05 | LYN/PTPRC/PTPN6/FCGR2B             |  |  | 4 |
|    | 54       |                                            |      |         |          |           |          |                                    |  |  |   |
|    |          | Fc receptor mediated                       |      | 145/186 |          |           |          |                                    |  |  |   |
| BP | GO:00024 | stimulatory signaling pathway              | 5/32 | 70      | 4.48E-06 | 8.78E-05  | 4.03E-05 | FCER1G/LYN/PTPRC/FCGR2B/FCGR3A     |  |  | 5 |
|    | 31       |                                            |      |         |          |           |          |                                    |  |  |   |
|    |          | regulation of STAT                         |      | 146/186 |          |           |          |                                    |  |  |   |
| BP | GO:19048 | cascade                                    | 5/32 | 70      | 4.64E-06 | 8.99E-05  | 4.13E-05 | AGT/LYN/PTPRC/STAT3/TNFRSF1A       |  |  | 5 |
|    | 92       |                                            |      |         |          |           |          |                                    |  |  |   |
|    |          | positive regulation of                     |      | 20/1867 |          |           |          |                                    |  |  |   |
| BP | GO:00425 | tumor necrosis factor biosynthetic process | 3/32 | 0       | 5.11E-06 | 9.62E-05  | 4.42E-05 | TYROBP/TLR4/CYBB                   |  |  | 3 |
|    | 35       |                                            |      |         |          |           |          |                                    |  |  |   |
|    |          | nitric-oxide synthase                      |      | 20/1867 |          |           |          |                                    |  |  |   |
| BP | GO:00517 | biosynthetic process                       | 3/32 | 0       | 5.11E-06 | 9.62E-05  | 4.42E-05 | TLR4/TLR2/CCL2                     |  |  | 3 |
|    | 67       |                                            |      |         |          |           |          |                                    |  |  |   |
|    |          | regulation of nitric-oxide                 |      | 20/1867 |          |           |          |                                    |  |  |   |
| BP | GO:00517 | synthase biosynthetic process              | 3/32 | 0       | 5.11E-06 | 9.62E-05  | 4.42E-05 | TLR4/TLR2/CCL2                     |  |  | 3 |
|    | 69       |                                            |      |         |          |           |          |                                    |  |  |   |
|    |          | positive regulation of                     |      | 153/186 |          | 0.0001080 |          |                                    |  |  |   |
| BP | GO:00458 | endocytosis                                | 5/32 | 70      | 5.83E-06 | 58        | 4.96E-05 | FCER1G/PTPRC/FCGR2B/CD14/CCL2      |  |  | 5 |
|    | 07       |                                            |      |         |          |           |          |                                    |  |  |   |
|    |          | regulation of vasculature                  |      | 422/186 |          | 0.0001080 |          |                                    |  |  |   |
| BP | GO:19013 | development                                | 7/32 | 70      | 5.92E-06 | 58        | 4.96E-05 | AGT/GRN/STAT3/PF4/CYBB/C3AR1/HMOX1 |  |  | 7 |
|    | 42       |                                            |      |         |          |           |          |                                    |  |  |   |
|    |          | lymphocyte proliferation                   |      | 272/186 |          | 0.0001080 |          |                                    |  |  |   |
| BP | GO:00466 |                                            | 6/32 | 70      | 5.96E-06 | 58        | 4.96E-05 | TYROBP/LYN/PTPRC/TLR4/PTPN6/FCGR2B |  |  | 6 |
|    | 51       |                                            |      |         |          |           |          |                                    |  |  |   |
|    |          | regulation of toll-like                    |      | 70/1867 |          | 0.0001080 |          |                                    |  |  |   |
| BP | GO:00341 | receptor signaling pathway                 | 4/32 | 0       | 6.02E-06 | 58        | 4.96E-05 | LYN/TLR4/TLR2/CD14                 |  |  | 4 |
|    | 21       |                                            |      |         |          |           |          |                                    |  |  |   |
|    |          | positive regulation of                     |      | 70/1867 |          | 0.0001080 |          |                                    |  |  |   |
| BP | GO:00507 | phagocytosis                               | 4/32 | 0       | 6.02E-06 | 58        | 4.96E-05 | FCER1G/PTPRC/FCGR2B/CCL2           |  |  | 4 |
|    | 66       |                                            |      |         |          |           |          |                                    |  |  |   |
|    |          | mononuclear cell                           |      | 274/186 |          | 0.0001106 |          |                                    |  |  |   |
| BP | GO:00329 | proliferation                              | 6/32 | 70      | 6.22E-06 | 54        | 5.08E-05 | TYROBP/LYN/PTPRC/TLR4/PTPN6/FCGR2B |  |  | 6 |
|    | 43       |                                            |      |         |          |           |          |                                    |  |  |   |
|    |          | production of molecular                    |      | 72/1867 |          | 0.0001187 |          |                                    |  |  |   |
| BP | GO:00025 | mediator involved in inflammatory response | 4/32 | 0       | 6.74E-06 | 55        | 5.45E-05 | FCER1G/GRN/LYN/TLR4                |  |  | 4 |
|    | 32       |                                            |      |         |          |           |          |                                    |  |  |   |
|    |          | negative regulation of                     |      | 73/1867 |          | 0.0001232 |          |                                    |  |  |   |
| BP | GO:00329 | mononuclear cell proliferation             | 4/32 | 0       | 7.12E-06 | 48        | 5.66E-05 | TYROBP/LYN/PTPN6/FCGR2B            |  |  | 4 |
|    | 45       |                                            |      |         |          |           |          |                                    |  |  |   |
|    |          | negative regulation of                     |      | 73/1867 |          | 0.0001232 |          |                                    |  |  |   |
| BP | GO:00506 | lymphocyte proliferation                   | 4/32 | 0       | 7.12E-06 | 48        | 5.66E-05 | TYROBP/LYN/PTPN6/FCGR2B            |  |  | 4 |
|    | 72       |                                            |      |         |          |           |          |                                    |  |  |   |
|    |          | regulation of endocytosis                  |      | 281/186 |          | 0.0001233 |          |                                    |  |  |   |
| BP | GO:00301 |                                            | 6/32 | 70      | 7.19E-06 | 1         | 5.66E-05 | FCER1G/PTPRC/TLR2/FCGR2B/CD14/CCL2 |  |  | 6 |
|    | 00       |                                            |      |         |          |           |          |                                    |  |  |   |
|    |          | regulation of                              |      | 74/1867 |          | 0.0001278 |          |                                    |  |  |   |
| BP | GO:00326 | interleukin-8 production                   | 4/32 | 0       | 7.52E-06 | 51        | 5.87E-05 | PTPRC/TLR4/TLR2/CD14               |  |  | 4 |
|    | 77       |                                            |      |         |          |           |          |                                    |  |  |   |
|    |          | reactive oxygen species                    |      | 284/186 |          | 0.0001287 |          |                                    |  |  |   |
| BP | GO:00725 |                                            | 6/32 | 70      | 7.64E-06 | 59        | 5.91E-05 | AGT/TYROBP/STAT3/TLR4/TLR2/CYBB    |  |  | 6 |

Supplementary Table2. The details for actual gene IDs and GO descriptions

|    |          |                                                                  |      |         |          |           |           |                                          |  |   |
|----|----------|------------------------------------------------------------------|------|---------|----------|-----------|-----------|------------------------------------------|--|---|
|    | 93       | metabolic process                                                |      | 70      |          | 46        |           |                                          |  |   |
| BP | GO:01500 | neuroinflammatory response                                       | 4/32 | 75/1867 | 7.93E-06 | 0.0001317 | 6.05E-05  | GRN/TYROBP/PTPRC/TLR2                    |  | 4 |
|    | 76       |                                                                  |      | 0       |          | 19        |           |                                          |  |   |
| BP | GO:00024 | production of molecular mediator of immune response              | 6/32 | 286/186 | 7.95E-06 | 0.0001317 | 6.05E-05  | FCER1G/PTPRC/TLR4/TLR2/FCGR2B/HMOX1      |  | 6 |
|    | 40       |                                                                  |      | 70      |          | 19        |           |                                          |  |   |
| BP | GO:00019 | cell killing                                                     | 5/32 | 168/186 | 9.19E-06 | 0.0001510 | 6.94E-05  | TYROBP/PTPRC/PTPN6/PF4/FCGR2B            |  | 5 |
|    | 06       |                                                                  |      | 70      |          | 83        |           |                                          |  |   |
| BP | GO:00706 | negative regulation of leukocyte proliferation                   | 4/32 | 78/1867 | 9.27E-06 | 0.0001511 | 6.94E-05  | TYROBP/LYN/PTPN6/FCGR2B                  |  | 4 |
|    | 64       |                                                                  |      | 0       |          | 09        |           |                                          |  |   |
| BP | GO:00018 | negative regulation of cytokine production                       | 6/32 | 296/186 | 9.67E-06 | 0.0001562 | 7.18E-05  | TYROBP/PTPRC/TLR4/PTPN6/FCGR2B/HMOX1     |  | 6 |
|    | 18       |                                                                  |      | 70      |          | 31        |           |                                          |  |   |
| BP | GO:00706 | leukocyte proliferation                                          | 6/32 | 298/186 | 1.00E-05 | 0.0001609 | 7.39E-05  | TYROBP/LYN/PTPRC/TLR4/PTPN6/FCGR2B       |  | 6 |
|    | 61       |                                                                  |      | 70      |          | 96        |           |                                          |  |   |
| BP | GO:00487 | astrocyte differentiation                                        | 4/32 | 81/1867 | 1.08E-05 | 0.0001712 | 7.87E-05  | GRN/VIM/STAT3/TLR4                       |  | 4 |
|    | 08       |                                                                  |      | 0       |          | 98        |           |                                          |  |   |
| BP | GO:00421 | T cell activation                                                | 7/32 | 464/186 | 1.10E-05 | 0.0001733 | 7.96E-05  | FCER1G/LYN/PTPRC/STAT3/PTPN6/FCGR2B/CCL2 |  | 7 |
|    | 10       |                                                                  |      | 70      |          | 21        |           |                                          |  |   |
|    |          | antigen processing and presentation of exogenous peptide antigen |      |         |          |           |           |                                          |  |   |
| BP | GO:00024 | presentation of exogenous peptide antigen                        | 5/32 | 175/186 | 1.12E-05 | 0.0001752 | 8.05E-05  | LGMN/FCER1G/IFI30/CYBB/FCGR2B            |  | 5 |
|    | 78       |                                                                  |      | 70      |          | 66        |           |                                          |  |   |
| BP | GO:00326 | interleukin-8 production                                         | 4/32 | 82/1867 | 1.13E-05 | 0.0001755 | 8.06E-05  | PTPRC/TLR4/TLR2/CD14                     |  | 4 |
|    | 37       |                                                                  |      | 0       |          | 49        |           |                                          |  |   |
| BP | GO:00421 | B cell activation                                                | 6/32 | 310/186 | 1.26E-05 | 0.0001935 | 8.89E-05  | TYROBP/LYN/PTPRC/TLR4/PTPN6/FCGR2B       |  | 6 |
|    | 13       |                                                                  |      | 70      |          | 06        |           |                                          |  |   |
| BP | GO:00713 | cellular response to interferon-gamma                            | 5/32 | 180/186 | 1.28E-05 | 0.0001961 | 9.01E-05  | VIM/IFI30/TLR4/TLR2/CCL2                 |  | 5 |
|    | 46       |                                                                  |      | 70      |          | 4         |           |                                          |  |   |
|    |          | lymphocyte activation involved in immune response                |      |         |          |           |           |                                          |  |   |
| BP | GO:00022 | involved in immune response                                      | 5/32 | 181/186 | 1.32E-05 | 0.0001998 | 9.18E-05  | FCER1G/PTPRC/STAT3/TLR4/FCGR2B           |  | 5 |
|    | 85       |                                                                  |      | 70      |          | 95        |           |                                          |  |   |
|    |          | antigen processing and presentation of exogenous antigen         |      |         |          |           |           |                                          |  |   |
| BP | GO:00198 | presentation of exogenous antigen                                | 5/32 | 182/186 | 1.36E-05 | 0.0002037 | 9.36E-05  | LGMN/FCER1G/IFI30/CYBB/FCGR2B            |  | 5 |
|    | 84       |                                                                  |      | 70      |          | 02        |           |                                          |  |   |
| BP | GO:00703 | ERK1 and ERK2 cascade                                            | 6/32 | 317/186 | 1.43E-05 | 0.0002128 | 9.78E-05  | AGT/LYN/PTPRC/TLR4/PTPN6/CCL2            |  | 6 |
|    | 71       |                                                                  |      | 70      |          | 74        |           |                                          |  |   |
| BP | GO:00512 | regulation of lymphocyte activation                              | 7/32 | 485/186 | 1.46E-05 | 0.0002168 | 9.96E-05  | TYROBP/LYN/PTPRC/TLR4/PTPN6/FCGR2B/CCL2  |  | 7 |
|    | 49       |                                                                  |      | 70      |          | 08        |           |                                          |  |   |
|    |          | positive regulation of cytosolic calcium ion concentration       |      |         |          |           |           |                                          |  |   |
| BP | GO:00072 | positive regulation of cytosolic calcium ion concentration       | 6/32 | 319/186 | 1.48E-05 | 0.0002172 | 9.98E-05  | AGT/S1PR1/LYN/PTPRC/PTPN6/C3AR1          |  | 6 |
|    | 04       |                                                                  |      | 70      |          | 53        |           |                                          |  |   |
|    |          | positive regulation of JAK-STAT cascade                          |      |         |          |           |           |                                          |  |   |
| BP | GO:00464 | positive regulation of JAK-STAT cascade                          | 4/32 | 89/1867 | 1.57E-05 | 0.0002283 | 0.0001048 | AGT/LYN/STAT3/TNFRSF1A                   |  | 4 |
|    | 27       |                                                                  |      | 0       |          | 93        | 94        |                                          |  |   |
| BP | GO:00480 | antigen processing and                                           | 5/32 | 189/186 | 1.63E-05 | 0.0002351 | 0.0001080 | LGMN/FCER1G/IFI30/CYBB/FCGR2B            |  | 5 |

Supplementary Table2. The details for actual gene IDs and GO descriptions

|    |          |                                                                                   |      |         |          |           |           |                                    |   |
|----|----------|-----------------------------------------------------------------------------------|------|---------|----------|-----------|-----------|------------------------------------|---|
|    | 02       | presentation of peptide antigen                                                   | 70   | 93      | 17       |           |           |                                    |   |
| BP | GO:00716 | mononuclear cell migration                                                        | 4/32 | 90/1867 | 1.64E-05 | 0.0002351 | 0.0001080 | LGMN/LYN/C3AR1/CCL2                | 4 |
| BP | GO:00607 | regulation of response to cytokine stimulus                                       | 5/32 | 190/186 | 1.67E-05 | 0.0002378 | 0.0001092 | PTPRC/TLR4/TLR2/TNFRSF1A/PTPN6     | 5 |
| BP | GO:00507 | positive regulation of peptidyl-tyrosine phosphorylation                          | 5/32 | 192/186 | 1.75E-05 | 0.0002474 | 0.0001136 | AGT/LYN/PTPRC/STAT3/TNFRSF1A       | 5 |
| BP | GO:19048 | positive regulation of STAT cascade                                               | 4/32 | 92/1867 | 1.79E-05 | 0.0002474 | 0.0001136 | AGT/LYN/STAT3/TNFRSF1A             | 4 |
| BP | GO:00427 | defense response to bacterium                                                     | 6/32 | 330/186 | 1.79E-05 | 0.0002474 | 0.0001136 | FCER1G/GRN/TLR4/TLR2/TNFRSF1A/LCN2 | 6 |
| BP | GO:00508 | negative regulation of B cell activation                                          | 3/32 | 30/1867 | 1.80E-05 | 0.0002474 | 0.0001136 | TYROBP/LYN/FCGR2B                  | 3 |
| BP | GO:00610 | myeloid leukocyte cytokine production                                             | 3/32 | 30/1867 | 1.80E-05 | 0.0002474 | 0.0001136 | FCER1G/TLR4/HMOX1                  | 3 |
| BP | GO:00512 | positive regulation of lymphocyte activation                                      | 6/32 | 334/186 | 1.92E-05 | 0.0002618 | 0.0001202 | TYROBP/LYN/PTPRC/TLR4/PTPN6/CCL2   | 6 |
| BP | GO:00026 | regulation of leukocyte migration                                                 | 5/32 | 196/186 | 1.94E-05 | 0.0002618 | 0.0001202 | LGMN/LYN/C3AR1/HMOX1/CCL2          | 5 |
| BP | GO:19012 | positive regulation of neuron death                                               | 4/32 | 94/1867 | 1.94E-05 | 0.0002618 | 0.0001202 | GRN/TYROBP/TLR4/FCGR2B             | 4 |
| BP | GO:00075 | blood coagulation                                                                 | 6/32 | 336/186 | 1.98E-05 | 0.0002624 | 0.0001205 | FCER1G/LYN/TLR4/LCP2/PTPN6/PF4     | 6 |
| BP | GO:00105 | regulation of platelet activation                                                 | 3/32 | 31/1867 | 1.99E-05 | 0.0002624 | 0.0001205 | FCER1G/LYN/TLR4                    | 3 |
| BP | GO:00433 | regulation of mast cell degranulation                                             | 3/32 | 31/1867 | 1.99E-05 | 0.0002624 | 0.0001205 | FCER1G/LYN/HMOX1                   | 3 |
| BP | GO:00343 | response to interferon-gamma                                                      | 5/32 | 199/186 | 2.08E-05 | 0.0002731 | 0.0001254 | VIM/IFI30/TLR4/TLR2/CCL2           | 5 |
| BP | GO:00075 | hemostasis                                                                        | 6/32 | 341/186 | 2.16E-05 | 0.0002805 | 0.0001288 | FCER1G/LYN/TLR4/LCP2/PTPN6/PF4     | 6 |
| BP | GO:00508 | coagulation                                                                       | 6/32 | 342/186 | 2.19E-05 | 0.0002816 | 0.0001293 | FCER1G/LYN/TLR4/LCP2/PTPN6/PF4     | 6 |
| BP | GO:00330 | regulation of mast cell activation involved in immune response                    | 3/32 | 32/1867 | 2.19E-05 | 0.0002816 | 0.0001293 | FCER1G/LYN/HMOX1                   | 3 |
| BP | GO:00198 | antigen processing and presentation of exogenous peptide antigen via MHC class II | 4/32 | 98/1867 | 2.29E-05 | 0.0002924 | 0.0001343 | LGMN/FCER1G/IFI30/FCGR2B           | 4 |
| BP | GO:00457 | positive regulation of angiogenesis                                               | 5/32 | 204/186 | 2.35E-05 | 0.0002976 | 0.0001367 | GRN/STAT3/CYBB/C3AR1/HMOX1         | 5 |

Supplementary Table2. The details for actual gene IDs and GO descriptions

|    |          |                                                                                                                           |      |         |          |           |           |                                      |   |
|----|----------|---------------------------------------------------------------------------------------------------------------------------|------|---------|----------|-----------|-----------|--------------------------------------|---|
| BP | GO:19012 | negative regulation of neuron death                                                                                       | 5/32 | 208/186 | 2.58E-05 | 0.0003230 | 0.0001483 | LGMN/GRN/STAT3/HMOX1/CCL2            | 5 |
|    | 15       |                                                                                                                           |      | 70      |          | 29        | 58        |                                      |   |
| BP | GO:00024 | antigen processing and presentation of peptide antigen via MHC class II                                                   | 4/32 | 101/186 | 2.58E-05 | 0.0003230 | 0.0001483 | LGMN/FCER1G/IFI30/FCGR2B             | 4 |
|    | 95       |                                                                                                                           |      | 70      |          | 29        | 58        |                                      |   |
| BP | GO:00425 | tumor necrosis factor biosynthetic process                                                                                | 3/32 | 34/1867 | 2.64E-05 | 0.0003251 | 0.0001493 | TYROBP/TLR4/CYBB                     | 3 |
|    | 33       |                                                                                                                           |      | 0       |          | 12        | 15        |                                      |   |
| BP | GO:00425 | regulation of tumor necrosis factor biosynthetic process                                                                  | 3/32 | 34/1867 | 2.64E-05 | 0.0003251 | 0.0001493 | TYROBP/TLR4/CYBB                     | 3 |
|    | 34       |                                                                                                                           |      | 0       |          | 12        | 15        |                                      |   |
| BP | GO:00023 | cytokine production involved in immune response                                                                           | 4/32 | 102/186 | 2.68E-05 | 0.0003251 | 0.0001493 | FCER1G/TLR4/TLR2/HMOX1               | 4 |
|    | 67       |                                                                                                                           |      | 70      |          | 12        | 15        |                                      |   |
| BP | GO:00025 | antigen processing and presentation of peptide or polysaccharide antigen via MHC class II                                 | 4/32 | 102/186 | 2.68E-05 | 0.0003251 | 0.0001493 | LGMN/FCER1G/IFI30/FCGR2B             | 4 |
|    | 04       |                                                                                                                           |      | 70      |          | 12        | 15        |                                      |   |
| BP | GO:00435 | regulation of neuron apoptotic process                                                                                    | 5/32 | 210/186 | 2.70E-05 | 0.0003251 | 0.0001493 | LGMN/GRN/TYROBP/HMOX1/CCL2           | 5 |
|    | 23       |                                                                                                                           |      | 70      |          | 12        | 15        |                                      |   |
| BP | GO:00507 | regulation of cytokine secretion                                                                                          | 5/32 | 210/186 | 2.70E-05 | 0.0003251 | 0.0001493 | LYN/TLR4/TLR2/FCGR2B/CD14            | 5 |
|    | 07       |                                                                                                                           |      | 70      |          | 12        | 15        |                                      |   |
| BP | GO:00514 | regulation of cytosolic calcium ion concentration                                                                         | 6/32 | 357/186 | 2.79E-05 | 0.0003339 | 0.0001533 | AGT/S1PR1/LYN/PTPRC/PTPN6/C3AR1      | 6 |
|    | 80       |                                                                                                                           |      | 70      |          | 14        | 57        |                                      |   |
| BP | GO:00341 | toll-like receptor 4 signaling pathway                                                                                    | 3/32 | 35/1867 | 2.88E-05 | 0.0003425 | 0.0001573 | LYN/TLR4/CD14                        | 3 |
|    | 42       |                                                                                                                           |      | 0       |          | 91        | 42        |                                      |   |
| BP | GO:00305 | neutrophil chemotaxis                                                                                                     | 4/32 | 104/186 | 2.90E-05 | 0.0003425 | 0.0001573 | FCER1G/PF4/C3AR1/CCL2                | 4 |
|    | 93       |                                                                                                                           |      | 70      |          | 91        | 42        |                                      |   |
| BP | GO:00024 | adaptive immune response based on somatic recombination of immune receptors built from immunoglobulin superfamily domains | 6/32 | 361/186 | 2.97E-05 | 0.0003489 | 0.0001602 | FCER1G/PTPRC/STAT3/TLR4/PTPN6/FCGR2B | 6 |
|    | 60       |                                                                                                                           |      | 70      |          | 9         | 81        |                                      |   |
| BP | GO:00181 | peptidyl-tyrosine phosphorylation                                                                                         | 6/32 | 363/186 | 3.06E-05 | 0.0003578 | 0.0001643 | AGT/LYN/PTPRC/STAT3/TNFRSF1A/PTPN6   | 6 |
|    | 08       |                                                                                                                           |      | 70      |          | 01        | 27        |                                      |   |
| BP | GO:00026 | positive regulation of immune effector process                                                                            | 5/32 | 216/186 | 3.09E-05 | 0.0003581 | 0.0001644 | FCER1G/LYN/PTPRC/TLR4/HMOX1          | 5 |
|    | 99       |                                                                                                                           |      | 70      |          | 52        | 89        |                                      |   |
| BP | GO:00027 | MyD88-dependent toll-like receptor signaling pathway                                                                      | 3/32 | 36/1867 | 3.14E-05 | 0.0003581 | 0.0001644 | TLR4/TLR2/CD14                       | 3 |
|    | 55       |                                                                                                                           |      | 0       |          | 52        | 89        |                                      |   |
| BP | GO:00327 | positive regulation of interleukin-10 production                                                                          | 3/32 | 36/1867 | 3.14E-05 | 0.0003581 | 0.0001644 | FCER1G/TLR4/TLR2                     | 3 |
|    | 33       |                                                                                                                           |      | 0       |          | 52        | 89        |                                      |   |

Supplementary Table2. The details for actual gene IDs and GO descriptions

|    |          |                                                                                                                                                                       |      |               |          |                 |                 |                                    |   |
|----|----------|-----------------------------------------------------------------------------------------------------------------------------------------------------------------------|------|---------------|----------|-----------------|-----------------|------------------------------------|---|
| BP | GO:00425 | superoxide anion<br>generation                                                                                                                                        | 3/32 | 36/1867<br>0  | 3.14E-05 | 0.0003581<br>52 | 0.0001644<br>89 | AGT/TYROBP/CYBB                    | 3 |
| BP | GO:00509 | regulation of chemotaxis                                                                                                                                              | 5/32 | 217/186<br>70 | 3.16E-05 | 0.0003581<br>52 | 0.0001644<br>89 | S1PR1/LGMN/LYN/C3AR1/CCL2          | 5 |
| BP | GO:00182 | peptidyl-tyrosine<br>modification                                                                                                                                     | 6/32 | 366/186<br>70 | 3.21E-05 | 0.0003616<br>16 | 0.0001660<br>8  | AGT/LYN/PTPRC/STAT3/TNFRSF1A/PTPN6 | 6 |
| BP | GO:00019 | leukocyte mediated<br>cytotoxicity                                                                                                                                    | 4/32 | 107/186<br>70 | 3.24E-05 | 0.0003631<br>87 | 0.0001668<br>01 | TYROBP/PTPRC/PTPN6/FCGR2B          | 4 |
| BP | GO:00027 | negative regulation of<br>lymphocyte mediated<br>immunity                                                                                                             | 3/32 | 38/1867<br>0  | 3.70E-05 | 0.0004127<br>86 | 0.0001895<br>8  | PTPRC/PTPN6/FCGR2B                 | 3 |
| BP | GO:00198 | antigen processing and<br>presentation                                                                                                                                | 5/32 | 226/186<br>70 | 3.84E-05 | 0.0004249<br>64 | 0.0001951<br>74 | LGMN/FCER1G/IFI30/CYBB/FCGR2B      | 5 |
| BP | GO:00026 | regulation of leukocyte<br>chemotaxis                                                                                                                                 | 4/32 | 114/186<br>70 | 4.15E-05 | 0.0004568<br>28 | 0.0002098<br>08 | LGMN/LYN/C3AR1/CCL2                | 4 |
| BP | GO:19040 | positive regulation of<br>vasculature development                                                                                                                     | 5/32 | 230/186<br>70 | 4.17E-05 | 0.0004568<br>28 | 0.0002098<br>08 | GRN/STAT3/CYBB/C3AR1/HMOX1         | 5 |
| BP | GO:00028 | negative regulation of<br>adaptive immune<br>response based on<br>somatic recombination<br>of immune receptors<br>built from<br>immunoglobulin<br>superfamily domains | 3/32 | 40/1867<br>0  | 4.33E-05 | 0.0004714<br>79 | 0.0002165<br>37 | PTPRC/PTPN6/FCGR2B                 | 3 |
| BP | GO:00027 | regulation of myeloid<br>leukocyte differentiation                                                                                                                    | 4/32 | 117/186<br>70 | 4.60E-05 | 0.0004982<br>48 | 0.0002288<br>31 | TYROBP/LYN/TLR4/PF4                | 4 |
| BP | GO:00341 | negative regulation of<br>toll-like receptor<br>signaling pathway                                                                                                     | 3/32 | 41/1867<br>0  | 4.66E-05 | 0.0005024<br>64 | 0.0002307<br>67 | LYN/TLR4/CD14                      | 3 |
| BP | GO:19902 | neutrophil migration                                                                                                                                                  | 4/32 | 118/186<br>70 | 4.76E-05 | 0.0005094<br>21 | 0.0002339<br>62 | FCER1G/PF4/C3AR1/CCL2              | 4 |
| BP | GO:00514 | neuron apoptotic process                                                                                                                                              | 5/32 | 239/186<br>70 | 5.01E-05 | 0.0005316<br>25 | 0.0002441<br>6  | LGMN/GRN/TYROBP/HMOX1/CCL2         | 5 |
| BP | GO:00330 | regulation of mast cell<br>activation                                                                                                                                 | 3/32 | 42/1867<br>0  | 5.02E-05 | 0.0005316<br>25 | 0.0002441<br>6  | FCER1G/LYN/HMOX1                   | 3 |
| BP | GO:19046 | cellular response to<br>amyloid-beta                                                                                                                                  | 3/32 | 43/1867<br>0  | 5.39E-05 | 0.0005677<br>29 | 0.0002607<br>42 | LGMN/TLR4/FCGR2B                   | 3 |
| BP | GO:19034 | reactive oxygen species<br>biosynthetic process                                                                                                                       | 4/32 | 122/186<br>70 | 5.42E-05 | 0.0005677<br>39 | 0.0002607<br>46 | AGT/STAT3/TLR4/CYBB                | 4 |
| BP | GO:00716 | granulocyte chemotaxis                                                                                                                                                | 4/32 | 123/186<br>70 | 5.59E-05 | 0.0005829<br>68 | 0.0002677<br>4  | FCER1G/PF4/C3AR1/CCL2              | 4 |
| BP | GO:00140 | astrocyte development                                                                                                                                                 | 3/32 | 44/1867<br>0  | 5.77E-05 | 0.0005987<br>99 | 0.0002750<br>11 | GRN/VIM/TLR4                       | 3 |

Supplementary Table2. The details for actual gene IDs and GO descriptions

|    |          |                                                                          |      |         |           |           |           |                               |   |
|----|----------|--------------------------------------------------------------------------|------|---------|-----------|-----------|-----------|-------------------------------|---|
| BP | GO:00028 | negative regulation of adaptive immune response                          | 3/32 | 45/1867 | 6.18E-05  | 0.0006374 | 0.0002927 | PTPRC/PTPN6/FCGR2B            | 3 |
| BP | GO:00456 | regulation of myeloid cell differentiation                               | 5/32 | 251/186 | 6.32E-05  | 0.0006479 | 0.0002976 | TYROBP/LYN/STAT3/TLR4/PF4     | 5 |
| BP | GO:00105 | positive regulation of endothelial cell migration                        | 4/32 | 128/186 | 6.53E-05  | 0.0006665 | 0.0003061 | AGT/LGMN/GRN/HMOX1            | 4 |
| BP | GO:00716 | regulation of mononuclear cell migration                                 | 3/32 | 46/1867 | 6.60E-05  | 0.0006703 | 0.0003078 | LGMN/LYN/C3AR1                | 3 |
| BP | GO:00508 | B cell receptor signaling pathway                                        | 4/32 | 129/186 | 6.73E-05  | 0.0006799 | 0.0003122 | LYN/PTPRC/PTPN6/FCGR2B        | 4 |
| BP | GO:00433 | mast cell degranulation                                                  | 3/32 | 47/1867 | 7.05E-05  | 0.0007078 | 0.0003250 | FCER1G/LYN/HMOX1              | 3 |
| BP | GO:00022 | mast cell activation involved in immune response                         | 3/32 | 48/1867 | 7.51E-05  | 0.0007502 | 0.0003445 | FCER1G/LYN/HMOX1              | 3 |
| BP | GO:00029 | regulation of humoral immune response                                    | 4/32 | 134/186 | 7.81E-05  | 0.0007761 | 0.0003564 | PTPRC/PTPN6/C3AR1/FCGR2B      | 4 |
| BP | GO:00024 | mast cell mediated immunity                                              | 3/32 | 49/1867 | 7.99E-05  | 0.0007861 | 0.0003610 | FCER1G/LYN/HMOX1              | 3 |
| BP | GO:00327 | positive regulation of interleukin-8 production                          | 3/32 | 49/1867 | 7.99E-05  | 0.0007861 | 0.0003610 | TLR4/TLR2/CD14                | 3 |
| BP | GO:00434 | response to peptide hormone                                              | 6/32 | 436/186 | 8.48E-05  | 0.0008306 | 0.0003814 | AGT/FABP3/LYN/STAT3/TLR2/CYBB | 6 |
| BP | GO:00316 | cellular response to extracellular stimulus                              | 5/32 | 268/186 | 8.61E-05  | 0.0008388 | 0.0003852 | LYN/PTPRC/CYBB/HMOX1/LCN2     | 5 |
| BP | GO:00072 | I-kappaB kinase/NF-kappaB signaling                                      | 5/32 | 269/186 | 8.76E-05  | 0.0008493 | 0.0003901 | TLR4/TLR2/TNFRSF1A/HMOX1/CD14 | 5 |
| BP | GO:00024 | immune response-regulating cell surface receptor signaling pathway       | 4/32 | 139/186 | 9.00E-05  | 0.0008637 | 0.0003966 | LYN/PTPRC/FCGR2B/FCGR3A       | 4 |
| BP | GO:00380 | involved in phagocytosis Fc-gamma receptor signaling pathway             | 4/32 | 139/186 | 9.00E-05  | 0.0008637 | 0.0003966 | LYN/PTPRC/FCGR2B/FCGR3A       | 4 |
| BP | GO:00975 | involved in phagocytosis granulocyte migration                           | 4/32 | 141/186 | 9.51E-05  | 0.0009084 | 0.0004172 | FCER1G/PF4/C3AR1/CCL2         | 4 |
| BP | GO:00028 | regulation of adaptive immune response based on somatic recombination of | 4/32 | 145/186 | 0.0001059 | 0.0010073 | 0.0004626 | FCER1G/PTPRC/PTPN6/FCGR2B     | 4 |



Supplementary Table2. The details for actual gene IDs and GO descriptions

|    |          |                                         |      |         |           |           |           |                                 |  |   |
|----|----------|-----------------------------------------|------|---------|-----------|-----------|-----------|---------------------------------|--|---|
|    |          | immune receptors built                  |      |         |           |           |           |                                 |  |   |
|    |          | from immunoglobulin                     |      |         |           |           |           |                                 |  |   |
|    |          | superfamily domains                     |      |         |           |           |           |                                 |  |   |
| BP | GO:19046 | response to amyloid-beta                | 3/32 | 54/1867 | 0.0001069 | 0.0010111 | 0.0004643 |                                 |  |   |
|    | 45       |                                         |      | 0       | 04        | 51        | 92        | LGMMN/TLR4/FCGR2B               |  | 3 |
| BP | GO:00458 | positive regulation of                  | 4/32 | 146/186 | 0.0001088 | 0.0010195 | 0.0004682 |                                 |  |   |
|    | 34       | lipid metabolic process                 |      | 70      | 39        | 1         | 31        | AGT/FABP3/LYN/TNFRSF1A          |  | 4 |
| BP | GO:00512 | negative regulation of                  | 4/32 | 146/186 | 0.0001088 | 0.0010195 | 0.0004682 |                                 |  |   |
|    | 50       | lymphocyte activation                   |      | 70      | 39        | 1         | 31        | TYROBP/LYN/PTPN6/FCGR2B         |  | 4 |
| BP | GO:00068 | cellular calcium ion                    | 6/32 | 458/186 | 0.0001111 | 0.0010318 | 0.0004738 |                                 |  |   |
|    | 74       | homeostasis                             |      | 70      | 68        | 17        | 84        | AGT/S1PR1/LYN/PTPRC/PTPN6/C3AR1 |  | 6 |
| BP | GO:00022 | myeloid cell homeostasis                | 4/32 | 147/186 | 0.0001117 | 0.0010318 | 0.0004738 |                                 |  |   |
|    | 62       |                                         |      | 70      | 49        | 17        | 84        | FCER1G/LYN/STAT3/HMOX1          |  | 4 |
| BP | GO:00435 | negative regulation of                  | 4/32 | 147/186 | 0.0001117 | 0.0010318 | 0.0004738 |                                 |  |   |
|    | 24       | neuron apoptotic process                |      | 70      | 49        | 17        | 84        | LGMMN/GRN/HMOX1/CCL2            |  | 4 |
| BP | GO:00027 | regulation of lymphocyte                | 4/32 | 149/186 | 0.0001177 | 0.0010768 | 0.0004945 |                                 |  |   |
|    | 06       | mediated immunity                       |      | 70      | 39        | 66        | 73        | FCER1G/PTPRC/PTPN6/FCGR2B       |  | 4 |
| BP | GO:00510 | positive regulation of                  | 4/32 | 149/186 | 0.0001177 | 0.0010768 | 0.0004945 |                                 |  |   |
|    | 92       | NF-kappaB transcription factor activity |      | 70      | 39        | 66        | 73        | AGT/STAT3/TLR4/TLR2             |  | 4 |
| BP | GO:00423 | negative regulation of                  | 6/32 | 468/186 | 0.0001251 | 0.0011390 | 0.0005231 |                                 |  |   |
|    | 26       | phosphorylation                         |      | 70      | 22        | 22        | 19        | LYN/PTPRC/STAT3/TLR4/GMFG/PTPN6 |  | 6 |
| BP | GO:00027 | negative regulation of B                | 2/32 | 10/1867 | 0.0001269 | 0.0011451 | 0.0005259 |                                 |  |   |
|    | 13       | cell mediated immunity                  |      | 0       | 8         | 84        | 5         | PTPN6/FCGR2B                    |  | 2 |
| BP | GO:00028 | negative regulation of                  | 2/32 | 10/1867 | 0.0001269 | 0.0011451 | 0.0005259 |                                 |  |   |
|    | 90       | immunoglobulin mediated immune response |      | 0       | 8         | 84        | 5         | PTPN6/FCGR2B                    |  | 2 |
| BP | GO:00550 | calcium ion homeostasis                 | 6/32 | 471/186 | 0.0001295 | 0.0011631 | 0.0005341 |                                 |  |   |
|    | 74       |                                         |      | 70      | 69        | 25        | 89        | AGT/S1PR1/LYN/PTPRC/PTPN6/C3AR1 |  | 6 |
| BP | GO:00327 | positive regulation of                  | 3/32 | 58/1867 | 0.0001323 | 0.0011827 | 0.0005432 |                                 |  |   |
|    | 22       | chemokine production                    |      | 0       | 7         | 88        | 2         | TLR4/TLR2/HMOX1                 |  | 3 |
| BP | GO:19037 | negative regulation of                  | 4/32 | 155/186 | 0.0001371 | 0.0012139 | 0.0005575 |                                 |  |   |
|    | 07       | hemopoiesis                             |      | 70      | 08        | 39        | 27        | LYN/TLR4/PF4/FCGR2B             |  | 4 |
| BP | GO:20012 | regulation of extrinsic                 | 4/32 | 155/186 | 0.0001371 | 0.0012139 | 0.0005575 |                                 |  |   |
|    | 36       | apoptotic signaling pathway             |      | 70      | 08        | 39        | 27        | AGT/PTPRC/PF4/HMOX1             |  | 4 |
| BP | GO:00703 | regulation of ERK1 and                  | 5/32 | 300/186 | 0.0001461 | 0.0012881 | 0.0005916 |                                 |  |   |
|    | 72       | ERK2 cascade                            |      | 70      | 54        | 48        | 09        | LYN/PTPRC/TLR4/PTPN6/CCL2       |  | 5 |
| BP | GO:00028 | regulation of adaptive                  | 4/32 | 160/186 | 0.0001549 | 0.0013222 | 0.0006072 |                                 |  |   |
|    | 19       | immune response                         |      | 70      | 33        | 28        | 61        | FCER1G/PTPRC/PTPN6/FCGR2B       |  | 4 |
| BP | GO:19033 | regulation of regulated                 | 4/32 | 160/186 | 0.0001549 | 0.0013222 | 0.0006072 |                                 |  |   |
|    | 05       | secretory pathway                       |      | 70      | 33        | 28        | 61        | FCER1G/LYN/FCGR2B/HMOX1         |  | 4 |
| BP | GO:00028 | negative regulation of                  | 2/32 | 11/1867 | 0.0001550 | 0.0013222 | 0.0006072 |                                 |  |   |
|    |          |                                         |      |         |           |           |           | FCGR2B/HMOX1                    |  | 2 |

Supplementary Table2. The details for actual gene IDs and GO descriptions

|    |          |                                                                    |      |         |           |           |           |                                 |   |
|----|----------|--------------------------------------------------------------------|------|---------|-----------|-----------|-----------|---------------------------------|---|
|    | 87       | myeloid leukocyte mediated immunity                                | 0    | 32      | 28        | 61        |           |                                 |   |
| BP | GO:00324 | detection of molecule of bacterial origin                          | 2/32 | 11/1867 | 0.0001550 | 0.0013222 | 0.0006072 | TLR4/TLR2                       | 2 |
|    | 90       |                                                                    | 0    | 32      | 28        | 61        |           |                                 |   |
| BP | GO:00702 | extracellular matrix constituent secretion                         | 2/32 | 11/1867 | 0.0001550 | 0.0013222 | 0.0006072 | AGT/TNFRSF1A                    | 2 |
|    | 78       |                                                                    | 0    | 32      | 28        | 61        |           |                                 |   |
| BP | GO:19025 | regulation of neutrophil activation                                | 2/32 | 11/1867 | 0.0001550 | 0.0013222 | 0.0006072 | GRN/FCGR2B                      | 2 |
|    | 63       |                                                                    | 0    | 32      | 28        | 61        |           |                                 |   |
| BP | GO:19052 | regulation of aspartic-type peptidase activity                     | 2/32 | 11/1867 | 0.0001550 | 0.0013222 | 0.0006072 | GRN/LYN                         | 2 |
|    | 45       |                                                                    | 0    | 32      | 28        | 61        |           |                                 |   |
| BP | GO:19030 | regulation of leukocyte cell-cell adhesion                         | 5/32 | 304/186 | 0.0001554 | 0.0013222 | 0.0006072 | LYN/PTPRC/PTPN6/FCGR2B/CCL2     | 5 |
|    | 37       |                                                                    | 70   | 76      | 28        | 61        |           |                                 |   |
| BP | GO:00725 | cellular divalent inorganic cation homeostasis                     | 6/32 | 493/186 | 0.0001661 | 0.0014070 | 0.0006462 | AGT/S1PR1/LYN/PTPRC/PTPN6/C3AR1 | 6 |
|    | 03       |                                                                    | 70   | 71      | 14        | 01        |           |                                 |   |
| BP | GO:00508 | regulation of T cell activation                                    | 5/32 | 314/186 | 0.0001807 | 0.0015240 | 0.0006999 | LYN/PTPRC/PTPN6/FCGR2B/CCL2     | 5 |
|    | 63       |                                                                    | 70   | 8       | 52        | 53        |           |                                 |   |
| BP | GO:00029 | negative regulation of humoral immune response                     | 2/32 | 12/1867 | 0.0001858 | 0.0015298 | 0.0007026 | PTPN6/FCGR2B                    | 2 |
|    | 21       |                                                                    | 0    | 39      | 2         | 02        |           |                                 |   |
| BP | GO:00360 | response to macrophage colony-stimulating factor                   | 2/32 | 12/1867 | 0.0001858 | 0.0015298 | 0.0007026 | TLR4/TLR2                       | 2 |
|    | 05       |                                                                    | 0    | 39      | 2         | 02        |           |                                 |   |
| BP | GO:00360 | cellular response to macrophage colony-stimulating factor stimulus | 2/32 | 12/1867 | 0.0001858 | 0.0015298 | 0.0007026 | TLR4/TLR2                       | 2 |
|    | 06       |                                                                    | 0    | 39      | 2         | 02        |           |                                 |   |
| BP | GO:00603 | regulation of Fc receptor mediated stimulatory signaling pathway   | 2/32 | 12/1867 | 0.0001858 | 0.0015298 | 0.0007026 | LYN/PTPRC                       | 2 |
|    | 68       |                                                                    | 0    | 39      | 2         | 02        |           |                                 |   |
| BP | GO:00025 | monocyte chemotaxis                                                | 3/32 | 65/1867 | 0.0001858 | 0.0015298 | 0.0007026 | LGMN/LYN/CCL2                   | 3 |
|    | 48       |                                                                    | 0    | 64      | 2         | 02        |           |                                 |   |
| BP | GO:00508 | antigen receptor-mediated signaling pathway                        | 5/32 | 316/186 | 0.0001861 | 0.0015298 | 0.0007026 | LYN/PTPRC/LCP2/PTPN6/FCGR2B     | 5 |
|    | 51       |                                                                    | 70   | 98      | 2         | 02        |           |                                 |   |
| BP | GO:00507 | negative regulation of inflammatory response                       | 4/32 | 169/186 | 0.0001911 | 0.0015639 | 0.0007182 | GRN/PTPRC/TNFRSF1A/FCGR2B       | 4 |
|    | 28       |                                                                    | 70   | 63      | 87        | 94        |           |                                 |   |
| BP | GO:00106 | positive regulation of epithelial cell migration                   | 4/32 | 171/186 | 0.0001999 | 0.0016292 | 0.0007482 | AGT/LGMN/GRN/HMOX1              | 4 |
|    | 34       |                                                                    | 70   | 78      | 34        | 6         |           |                                 |   |
| BP | GO:00466 | response to antibiotic                                             | 5/32 | 327/186 | 0.0002182 | 0.0017506 | 0.0008040 | STAT3/CYBB/HMOX1/CD14/LCN2      | 5 |
|    | 77       |                                                                    | 70   | 56      | 29        | 13        |           |                                 |   |
| BP | GO:00022 | macrophage activation involved in immune response                  | 2/32 | 13/1867 | 0.0002193 | 0.0017506 | 0.0008040 | GRN/TYROBP                      | 2 |
|    | 81       |                                                                    | 0    | 93      | 29        | 13        |           |                                 |   |

Supplementary Table2. The details for actual gene IDs and GO descriptions

|    |          |                           |      |         |           |           |           |  |                             |   |
|----|----------|---------------------------|------|---------|-----------|-----------|-----------|--|-----------------------------|---|
|    |          | regulation of acute       |      |         |           |           |           |  |                             |   |
| BP | GO:00028 | inflammatory response     | 2/32 | 13/1867 | 0.0002193 | 0.0017506 | 0.0008040 |  | FCER1G/FCGR2B               | 2 |
|    | 64       | to antigenic stimulus     |      | 0       | 93        | 29        | 13        |  |                             |   |
| BP | GO:00433 | negative regulation of    | 2/32 | 13/1867 | 0.0002193 | 0.0017506 | 0.0008040 |  | FCGR2B/HMOX1                | 2 |
|    | 01       | leukocyte degranulation   |      | 0       | 93        | 29        | 13        |  |                             |   |
| BP | GO:00905 | inflammatory response     | 2/32 | 13/1867 | 0.0002193 | 0.0017506 | 0.0008040 |  | GRN/HMOX1                   | 2 |
|    | 94       | to wounding               |      | 0       | 93        | 29        | 13        |  |                             |   |
| BP | GO:00615 | myeloid cell              | 3/32 | 70/1867 | 0.0002315 | 0.0018402 | 0.0008451 |  | TYROBP/TLR2/PTPN6           | 3 |
|    | 15       | development               |      | 0       | 75        | 6         | 78        |  |                             |   |
| BP | GO:19030 | regulation of response to | 4/32 | 179/186 | 0.0002381 | 0.0018851 | 0.0008657 |  | FCER1G/GRN/LYN/TLR4         | 4 |
|    | 34       | wounding                  |      | 70      | 96        | 48        | 94        |  |                             |   |
| BP | GO:00425 | positive regulation of    | 3/32 | 71/1867 | 0.0002415 | 0.0019036 | 0.0008742 |  | LYN/STAT3/TNFRSF1A          | 3 |
|    | 31       | tyrosine phosphorylation  |      | 0       | 1         | 11        | 73        |  |                             |   |
|    |          | of STAT protein           |      |         |           |           |           |  |                             |   |
| BP | GO:00071 | leukocyte cell-cell       | 5/32 | 337/186 | 0.0002509 | 0.0019697 | 0.0009046 |  | LYN/PTPRC/PTPN6/FCGR2B/CCL2 | 5 |
|    | 59       | adhesion                  |      | 70      | 11        | 01        | 26        |  |                             |   |
| BP | GO:00453 | regulation of MHC class   | 2/32 | 14/1867 | 0.0002556 | 0.0019830 | 0.0009107 |  | TLR4/PF4                    | 2 |
|    | 46       | II biosynthetic process   |      | 0       | 84        | 88        | 75        |  |                             |   |
|    |          | JAK-STAT cascade          |      |         |           |           |           |  |                             |   |
| BP | GO:00603 | involved in growth        | 2/32 | 14/1867 | 0.0002556 | 0.0019830 | 0.0009107 |  | LYN/STAT3                   | 2 |
|    | 97       | hormone signaling         |      | 0       | 84        | 88        | 75        |  |                             |   |
|    |          | pathway                   |      |         |           |           |           |  |                             |   |
| BP | GO:00985 | detection of other        | 2/32 | 14/1867 | 0.0002556 | 0.0019830 | 0.0009107 |  | TLR4/TLR2                   | 2 |
|    | 43       | organism                  |      | 0       | 84        | 88        | 75        |  |                             |   |
| BP | GO:00023 | B cell activation         | 3/32 | 73/1867 | 0.0002622 | 0.0020174 | 0.0009265 |  | PTPRC/TLR4/FCGR2B           | 3 |
|    | 12       | involved in immune        |      | 0       | 01        | 88        | 74        |  |                             |   |
|    |          | response                  |      |         |           |           |           |  |                             |   |
| BP | GO:00068 | superoxide metabolic      | 3/32 | 73/1867 | 0.0002622 | 0.0020174 | 0.0009265 |  | AGT/TYROBP/CYBB             | 3 |
|    | 01       | process                   |      | 0       | 01        | 88        | 74        |  |                             |   |
| BP | GO:00434 | negative regulation of    | 4/32 | 184/186 | 0.0002646 | 0.0020279 | 0.0009313 |  | LYN/PTPRC/TLR4/PTPN6        | 4 |
|    | 09       | MAPK cascade              |      | 70      |           | 01        | 56        |  |                             |   |
| BP | GO:19037 | positive regulation of    | 4/32 | 185/186 | 0.0002701 | 0.0020620 | 0.0009470 |  | TYROBP/PTPRC/STAT3/PF4      | 4 |
|    | 08       | hemopoiesis               |      | 70      | 23        | 82        | 54        |  |                             |   |
| BP | GO:00324 | lysosome localization     | 3/32 | 74/1867 | 0.0002729 | 0.0020674 | 0.0009495 |  | FCER1G/LYN/HMOX1            | 3 |
|    | 18       |                           |      | 0       | 62        | 73        | 3         |  |                             |   |
| BP | GO:00703 | negative regulation of    | 3/32 | 74/1867 | 0.0002729 | 0.0020674 | 0.0009495 |  | LYN/PTPRC/TLR4              | 3 |
|    | 73       | ERK1 and ERK2             |      | 0       | 62        | 73        | 3         |  |                             |   |
|    |          | cascade                   |      |         |           |           |           |  |                             |   |
| BP | GO:00341 | toll-like receptor 2      | 2/32 | 15/1867 | 0.0002947 | 0.0021978 | 0.0010093 |  | LYN/TLR2                    | 2 |
|    | 34       | signaling pathway         |      | 0       | 05        | 17        | 94        |  |                             |   |
| BP | GO:00453 | MHC class II              | 2/32 | 15/1867 | 0.0002947 | 0.0021978 | 0.0010093 |  | TLR4/PF4                    | 2 |
|    | 42       | biosynthetic process      |      | 0       | 05        | 17        | 94        |  |                             |   |
| BP | GO:00454 | positive regulation of    | 2/32 | 15/1867 | 0.0002947 | 0.0021978 | 0.0010093 |  | TYROBP/STAT3                | 2 |
|    | 10       | interleukin-6             |      | 0       | 05        | 17        | 94        |  |                             |   |

Supplementary Table2. The details for actual gene IDs and GO descriptions

|    |          |                                                                                  |      |         |           |           |           |                                 |  |   |
|----|----------|----------------------------------------------------------------------------------|------|---------|-----------|-----------|-----------|---------------------------------|--|---|
|    |          | biosynthetic process                                                             |      |         |           |           |           |                                 |  |   |
| BP | GO:20004 | positive regulation of interleukin-8 secretion                                   | 2/32 | 15/1867 | 0.0002947 | 0.0021978 | 0.0010093 | TLR2/CD14                       |  | 2 |
|    | 84       |                                                                                  |      | 0       | 05        | 17        | 94        |                                 |  |   |
| BP | GO:00324 | positive regulation of type I interferon production                              | 3/32 | 77/1867 | 0.0003069 | 0.0022630 | 0.0010393 | TLR4/TLR2/CD14                  |  | 3 |
|    | 81       |                                                                                  |      | 0       | 49        | 16        | 37        |                                 |  |   |
| BP | GO:00486 | response to axon injury                                                          | 3/32 | 77/1867 | 0.0003069 | 0.0022630 | 0.0010393 | GRN/TYROBP/LYN                  |  | 3 |
|    | 78       |                                                                                  |      | 0       | 49        | 16        | 37        |                                 |  |   |
| BP | GO:19012 | positive regulation of NIK/NF-kappaB signaling                                   | 3/32 | 77/1867 | 0.0003069 | 0.0022630 | 0.0010393 | TLR4/TLR2/CD14                  |  | 3 |
|    | 24       |                                                                                  |      | 0       | 49        | 16        | 37        |                                 |  |   |
| BP | GO:00300 | lymphocyte differentiation                                                       | 5/32 | 353/186 | 0.0003107 | 0.0022824 | 0.0010482 | FCER1G/PTPRC/STAT3/PTPN6/FCGR2B |  | 5 |
|    | 98       |                                                                                  |      | 70      | 6         | 37        | 57        |                                 |  |   |
| BP | GO:00019 | regulation of leukocyte mediated cytotoxicity                                    | 3/32 | 78/1867 | 0.0003188 | 0.0023330 | 0.0010715 | TYROBP/PTPRC/FCGR2B             |  | 3 |
|    | 10       |                                                                                  |      | 0       | 56        | 6         | 06        |                                 |  |   |
| BP | GO:20003 | regulation of reactive oxygen species metabolic process                          | 4/32 | 195/186 | 0.0003300 | 0.0023863 | 0.0010959 | AGT/TYROBP/STAT3/TLR4           |  | 4 |
|    | 77       |                                                                                  |      | 70      | 18        | 16        | 66        |                                 |  |   |
| BP | GO:00301 | regulation of blood coagulation                                                  | 3/32 | 79/1867 | 0.0003310 | 0.0023863 | 0.0010959 | FCER1G/LYN/TLR4                 |  | 3 |
|    | 93       |                                                                                  |      | 0       | 57        | 16        | 66        |                                 |  |   |
| BP | GO:00425 | antigen processing and presentation of exogenous peptide antigen via MHC class I | 3/32 | 79/1867 | 0.0003310 | 0.0023863 | 0.0010959 | FCER1G/IFI30/CYBB               |  | 3 |
|    | 90       |                                                                                  |      | 0       | 57        | 16        | 66        |                                 |  |   |
| BP | GO:00712 | cellular response to mechanical stimulus                                         | 3/32 | 79/1867 | 0.0003310 | 0.0023863 | 0.0010959 | AGT/TLR4/TNFRSF1A               |  | 3 |
|    | 60       |                                                                                  |      | 0       | 57        | 16        | 66        |                                 |  |   |
| BP | GO:00109 | positive regulation of peptidase activity                                        | 4/32 | 197/186 | 0.0003430 | 0.0024581 | 0.0011289 | LGMMN/GRN/LYN/STAT3             |  | 4 |
|    | 52       |                                                                                  |      | 70      | 51        | 33        | 49        |                                 |  |   |
| BP | GO:19000 | regulation of hemostasis                                                         | 3/32 | 80/1867 | 0.0003435 | 0.0024581 | 0.0011289 | FCER1G/LYN/TLR4                 |  | 3 |
|    | 46       |                                                                                  |      | 0       | 55        | 33        | 49        |                                 |  |   |
| BP | GO:00321 | negative regulation of response to external stimulus                             | 5/32 | 365/186 | 0.0003623 | 0.0025830 | 0.0011863 | GRN/PTPRC/TNFRSF1A/FCGR2B/CCL2  |  | 5 |
|    | 02       |                                                                                  |      | 70      | 41        | 1         | 02        |                                 |  |   |
| BP | GO:00326 | regulation of chemokine production                                               | 3/32 | 82/1867 | 0.0003694 | 0.0026145 | 0.0012007 | TLR4/TLR2/HMOX1                 |  | 3 |
|    | 42       |                                                                                  |      | 0       | 57        | 17        | 72        |                                 |  |   |
| BP | GO:00462 | nitric oxide metabolic process                                                   | 3/32 | 82/1867 | 0.0003694 | 0.0026145 | 0.0012007 | AGT/TLR4/TLR2                   |  | 3 |
|    | 09       |                                                                                  |      | 0       | 57        | 17        | 72        |                                 |  |   |
| BP | GO:00508 | positive regulation of T cell activation                                         | 4/32 | 202/186 | 0.0003772 | 0.0026599 | 0.0012216 | LYN/PTPRC/PTPN6/CCL2            |  | 4 |
|    | 70       |                                                                                  |      | 70      | 48        | 45        | 35        |                                 |  |   |
| BP | GO:00107 | positive regulation of macrophage derived foam cell differentiation              | 2/32 | 17/1867 | 0.0003808 | 0.0026662 | 0.0012245 | AGT/PF4                         |  | 2 |
|    | 44       |                                                                                  |      | 0       | 96        | 75        | 42        |                                 |  |   |
| BP | GO:00506 | hydrogen peroxide biosynthetic process                                           | 2/32 | 17/1867 | 0.0003808 | 0.0026662 | 0.0012245 | STAT3/CYBB                      |  | 2 |
|    | 65       |                                                                                  |      | 0       | 96        | 75        | 42        |                                 |  |   |

Supplementary Table2. The details for actual gene IDs and GO descriptions

|    |          |                                                                                          |      |         |           |           |           |                         |   |
|----|----------|------------------------------------------------------------------------------------------|------|---------|-----------|-----------|-----------|-------------------------|---|
| BP | GO:00425 | regulation of tyrosine phosphorylation of STAT protein                                   | 3/32 | 83/1867 | 0.0003828 | 0.0026704 | 0.0012264 | LYN/STAT3/TNFRSF1A      | 3 |
| BP | GO:00027 | regulation of cytokine production involved in immune response                            | 3/32 | 84/1867 | 0.0003965 | 0.0027463 | 0.0012613 | FCER1G/TLR4/HMOX1       | 3 |
| BP | GO:00508 | regulation of coagulation                                                                | 3/32 | 84/1867 | 0.0003965 | 0.0027463 | 0.0012613 | FCER1G/LYN/TLR4         | 3 |
| BP | GO:20010 | reactive nitrogen species metabolic process                                              | 3/32 | 85/1867 | 0.0004106 | 0.0028334 | 0.0013013 | AGT/TLR4/TLR2           | 3 |
| BP | GO:00072 | tyrosine phosphorylation of STAT protein                                                 | 3/32 | 86/1867 | 0.0004249 | 0.0029020 | 0.0013328 | LYN/STAT3/TNFRSF1A      | 3 |
| BP | GO:00019 | negative regulation of leukocyte mediated cytotoxicity                                   | 2/32 | 18/1867 | 0.0004280 | 0.0029020 | 0.0013328 | PTPRC/FCGR2B            | 2 |
| BP | GO:00072 | I-kappaB phosphorylation                                                                 | 2/32 | 18/1867 | 0.0004280 | 0.0029020 | 0.0013328 | TLR4/TLR2               | 2 |
| BP | GO:00326 | negative regulation of interleukin-10 production                                         | 2/32 | 18/1867 | 0.0004280 | 0.0029020 | 0.0013328 | TYROBP/FCGR2B           | 2 |
| BP | GO:01500 | negative regulation of neuroinflammatory response                                        | 2/32 | 18/1867 | 0.0004280 | 0.0029020 | 0.0013328 | GRN/PTPRC               | 2 |
| BP | GO:00140 | positive regulation of phosphatidylinositol 3-kinase signaling                           | 3/32 | 87/1867 | 0.0004396 | 0.0029701 | 0.0013641 | AGT/LYN/PTPN6           | 3 |
| BP | GO:00313 | positive regulation of cell projection organization                                      | 5/32 | 383/186 | 0.0004515 | 0.0030404 | 0.0013963 | AGT/PLXNB2/GRN/LYN/LCN2 | 5 |
| BP | GO:00326 | chemokine production                                                                     | 3/32 | 89/1867 | 0.0004699 | 0.0031411 | 0.0014426 | TLR4/TLR2/HMOX1         | 3 |
| BP | GO:00027 | negative regulation of T cell mediated immunity                                          | 2/32 | 19/1867 | 0.0004778 | 0.0031411 | 0.0014426 | PTPRC/FCGR2B            | 2 |
| BP | GO:00029 | positive regulation of humoral immune response                                           | 2/32 | 19/1867 | 0.0004778 | 0.0031411 | 0.0014426 | PTPRC/FCGR2B            | 2 |
| BP | GO:00329 | positive regulation of superoxide anion generation                                       | 2/32 | 19/1867 | 0.0004778 | 0.0031411 | 0.0014426 | AGT/TYROBP              | 2 |
| BP | GO:00610 | positive regulation of myeloid leukocyte cytokine production involved in immune response | 2/32 | 19/1867 | 0.0004778 | 0.0031411 | 0.0014426 | FCER1G/TLR4             | 2 |
| BP | GO:00985 | detection of external                                                                    | 2/32 | 19/1867 | 0.0004778 | 0.0031411 | 0.0014426 | TLR4/TLR2               | 2 |

Supplementary Table2. The details for actual gene IDs and GO descriptions

|    |          |                                                                            |      |         |           |           |           |                              |   |
|----|----------|----------------------------------------------------------------------------|------|---------|-----------|-----------|-----------|------------------------------|---|
|    | 81       | biotic stimulus                                                            |      | 0       | 97        | 61        | 44        |                              |   |
| BP | GO:20000 | positive regulation of protein localization to cell surface                | 2/32 | 19/1867 | 0.0004778 | 0.0031411 | 0.0014426 | FCER1G/TYROBP                | 2 |
|    | 10       |                                                                            |      | 0       | 97        | 61        | 44        |                              |   |
| BP | GO:00171 | regulation of exocytosis                                                   | 4/32 | 217/186 | 0.0004944 | 0.0032392 | 0.0014876 | FCER1G/LYN/FCGR2B/HMOX1      | 4 |
|    | 57       |                                                                            |      | 70      | 84        | 07        | 73        |                              |   |
| BP | GO:00456 | negative regulation of myeloid cell differentiation                        | 3/32 | 91/1867 | 0.0005015 | 0.0032518 | 0.0014934 | LYN/TLR4/PF4                 | 3 |
|    | 38       |                                                                            |      | 0       | 41        | 55        | 83        |                              |   |
| BP | GO:00456 | positive regulation of myeloid cell differentiation                        | 3/32 | 91/1867 | 0.0005015 | 0.0032518 | 0.0014934 | TYROBP/STAT3/PF4             | 3 |
|    | 39       |                                                                            |      | 0       | 41        | 55        | 83        |                              |   |
| BP | GO:00160 | immunoglobulin mediated immune response                                    | 4/32 | 218/186 | 0.0005031 | 0.0032518 | 0.0014934 | FCER1G/PTPRC/PTPN6/FCGR2B    | 4 |
|    | 64       |                                                                            |      | 70      | 24        | 55        | 83        |                              |   |
| BP | GO:19030 | positive regulation of leukocyte cell-cell adhesion                        | 4/32 | 218/186 | 0.0005031 | 0.0032518 | 0.0014934 | LYN/PTPRC/PTPN6/CCL2         | 4 |
|    | 39       |                                                                            |      | 70      | 24        | 55        | 83        |                              |   |
| BP | GO:00025 | acute inflammatory response                                                | 4/32 | 220/186 | 0.0005207 | 0.0033544 | 0.0015405 | FCER1G/STAT3/C3AR1/FCGR2B    | 4 |
|    | 26       |                                                                            |      | 70      | 24        | 34        | 94        |                              |   |
| BP | GO:00197 | B cell mediated immunity                                                   | 4/32 | 221/186 | 0.0005296 | 0.0033943 | 0.0015589 | FCER1G/PTPRC/PTPN6/FCGR2B    | 4 |
|    | 24       |                                                                            |      | 70      | 88        | 94        | 46        |                              |   |
| BP | GO:19039 | regulation of microglial cell activation                                   | 2/32 | 20/1867 | 0.0005304 | 0.0033943 | 0.0015589 | GRN/PTPRC                    | 2 |
|    | 78       |                                                                            |      | 0       | 29        | 94        | 46        |                              |   |
| BP | GO:19035 | positive regulation of secretion by cell                                   | 5/32 | 399/186 | 0.0005440 | 0.0034703 | 0.0015938 | AGT/FCER1G/TLR4/TLR2/CD14    | 5 |
|    | 32       |                                                                            |      | 70      | 87        | 47        | 29        |                              |   |
| BP | GO:00027 | positive regulation of production of molecular mediator of immune response | 3/32 | 95/1867 | 0.0005687 | 0.0035956 | 0.0016513 | FCER1G/PTPRC/TLR4            | 3 |
|    | 02       |                                                                            |      | 0       | 85        | 3         | 68        |                              |   |
| BP | GO:00224 | regulation of cell-cell adhesion                                           | 5/32 | 403/186 | 0.0005692 | 0.0035956 | 0.0016513 | LYN/PTPRC/PTPN6/FCGR2B/CCL2  | 5 |
|    | 07       |                                                                            |      | 70      | 93        | 3         | 68        |                              |   |
| BP | GO:00457 | positive regulation of cell adhesion                                       | 5/32 | 403/186 | 0.0005692 | 0.0035956 | 0.0016513 | LYN/PTPRC/PTPN6/S100A10/CCL2 | 5 |
|    | 85       |                                                                            |      | 70      | 93        | 3         | 68        |                              |   |
| BP | GO:00024 | acute inflammatory response to antigenic stimulus                          | 2/32 | 21/1867 | 0.0005856 | 0.0036681 | 0.0016846 | FCER1G/FCGR2B                | 2 |
|    | 38       |                                                                            |      | 0       | 36        | 56        | 77        |                              |   |
| BP | GO:00170 | antibiotic biosynthetic process                                            | 2/32 | 21/1867 | 0.0005856 | 0.0036681 | 0.0016846 | STAT3/CYBB                   | 2 |
|    | 00       |                                                                            |      | 0       | 36        | 56        | 77        |                              |   |
| BP | GO:00024 | antigen processing and presentation of peptide antigen via MHC class I     | 3/32 | 96/1867 | 0.0005864 | 0.0036681 | 0.0016846 | FCER1G/IFI30/CYBB            | 3 |
|    | 74       |                                                                            |      | 0       | 51        | 56        | 77        |                              |   |
| BP | GO:00303 | osteoclast differentiation                                                 | 3/32 | 97/1867 | 0.0006044 | 0.0037624 | 0.0017279 | FCER1G/TYROBP/TLR4           | 3 |
|    | 16       |                                                                            |      | 0       | 65        | 21        | 71        |                              |   |

Supplementary Table2. The details for actual gene IDs and GO descriptions

|    |          |                                                                  |      |         |           |           |           |                           |   |
|----|----------|------------------------------------------------------------------|------|---------|-----------|-----------|-----------|---------------------------|---|
| BP | GO:00105 | regulation of endothelial cell migration                         | 4/32 | 229/186 | 0.0006054 | 0.0037624 | 0.0017279 | AGT/LGMN/GRN/HMOX1        | 4 |
|    | 94       |                                                                  |      | 70      | 03        | 21        | 71        |                           |   |
| BP | GO:00313 | regulation of cell killing                                       | 3/32 | 98/1867 | 0.0006228 | 0.0038583 | 0.0017720 | TYROBP/PTPRC/FCGR2B       | 3 |
|    | 41       |                                                                  |      | 0       | 29        | 56        | 31        |                           |   |
| BP | GO:00313 | negative regulation of cell killing                              | 2/32 | 22/1867 | 0.0006435 | 0.0039486 | 0.0018134 | PTPRC/FCGR2B              | 2 |
|    | 42       |                                                                  |      | 0       | 11        | 32        | 92        |                           |   |
| BP | GO:00329 | regulation of superoxide anion generation                        | 2/32 | 22/1867 | 0.0006435 | 0.0039486 | 0.0018134 | AGT/TYROBP                | 2 |
|    | 28       |                                                                  |      | 0       | 11        | 32        | 92        |                           |   |
| BP | GO:00507 | negative regulation of phagocytosis                              | 2/32 | 22/1867 | 0.0006435 | 0.0039486 | 0.0018134 | TLR2/FCGR2B               | 2 |
|    | 65       |                                                                  |      | 0       | 11        | 32        | 92        |                           |   |
|    |          | phospholipase                                                    |      |         |           |           |           |                           |   |
| BP | GO:00072 | C-activating G protein-coupled receptor signaling pathway        | 3/32 | 100/186 | 0.0006606 | 0.0040408 | 0.0018558 | AGT/S1PR1/C3AR1           | 3 |
|    | 00       |                                                                  |      | 70      | 2         | 29        | 35        |                           |   |
| BP | GO:00064 | negative regulation of protein kinase activity                   | 4/32 | 235/186 | 0.0006670 | 0.0040671 | 0.0018679 | LYN/PTPRC/GMFG/PTPN6      | 4 |
|    | 69       |                                                                  |      | 70      | 28        | 91        | 42        |                           |   |
| BP | GO:00486 | positive regulation of smooth muscle cell proliferation          | 3/32 | 101/186 | 0.0006800 | 0.0041206 | 0.0018925 | AGT/S1PR1/HMOX1           | 3 |
|    | 61       |                                                                  |      | 70      | 53        | 96        | 16        |                           |   |
| BP | GO:19034 | regulation of reactive oxygen species biosynthetic process       | 3/32 | 101/186 | 0.0006800 | 0.0041206 | 0.0018925 | AGT/STAT3/TLR4            | 3 |
|    | 26       |                                                                  |      | 70      | 53        | 96        | 16        |                           |   |
| BP | GO:20003 | positive regulation of reactive oxygen species metabolic process | 3/32 | 102/186 | 0.0006998 | 0.0042274 | 0.0019415 | AGT/TYROBP/TLR4           | 3 |
|    | 79       |                                                                  |      | 70      | 47        | 25        | 34        |                           |   |
| BP | GO:00095 | detection of biotic stimulus                                     | 2/32 | 23/1867 | 0.0007040 | 0.0042395 | 0.0019471 | TLR4/TLR2                 | 2 |
|    | 95       |                                                                  |      | 0       | 44        | 7         | 11        |                           |   |
| BP | GO:00313 | negative regulation of defense response                          | 4/32 | 239/186 | 0.0007105 | 0.0042520 | 0.0019528 | GRN/PTPRC/TNFRSF1A/FCGR2B | 4 |
|    | 48       |                                                                  |      | 70      | 09        | 87        | 6         |                           |   |
| BP | GO:00330 | muscle cell proliferation                                        | 4/32 | 239/186 | 0.0007105 | 0.0042520 | 0.0019528 | AGT/S1PR1/STAT3/HMOX1     | 4 |
|    | 02       |                                                                  |      | 70      | 09        | 87        | 6         |                           |   |
| BP | GO:19021 | negative regulation of leukocyte differentiation                 | 3/32 | 103/186 | 0.0007200 | 0.0042956 | 0.0019728 | LYN/TLR4/FCGR2B           | 3 |
|    | 06       |                                                                  |      | 70      | 06        | 65        | 74        |                           |   |
| BP | GO:00510 | positive regulation of secretion                                 | 5/32 | 428/186 | 0.0007473 | 0.0044450 | 0.0020415 | AGT/FCER1G/TLR4/TLR2/CD14 | 5 |
|    | 47       |                                                                  |      | 70      | 44        | 9         | 01        |                           |   |
| BP | GO:00019 | negative regulation of protein phosphorylation                   | 5/32 | 429/186 | 0.0007552 | 0.0044783 | 0.0020567 | LYN/PTPRC/TLR4/GMFG/PTPN6 | 5 |
|    | 33       |                                                                  |      | 70      | 42        | 3         | 67        |                           |   |
| BP | GO:00028 | regulation of inflammatory response to antigenic stimulus        | 2/32 | 24/1867 | 0.0007672 | 0.0045080 | 0.0020704 | FCER1G/FCGR2B             | 2 |
|    | 61       |                                                                  |      | 0       | 27        | 39        | 11        |                           |   |
| BP | GO:00315 | membrane raft organization                                       | 2/32 | 24/1867 | 0.0007672 | 0.0045080 | 0.0020704 | PTPRC/S100A10             | 2 |
|    | 79       |                                                                  |      | 0       | 27        | 39        | 11        |                           |   |
| BP | GO:00603 | growth hormone receptor signaling pathway                        | 2/32 | 24/1867 | 0.0007672 | 0.0045080 | 0.0020704 | LYN/STAT3                 | 2 |
|    | 96       |                                                                  |      | 0       | 27        | 39        | 11        |                           |   |

Supplementary Table2. The details for actual gene IDs and GO descriptions

|    |          |                           |      |         |           |           |           |                            |  |   |
|----|----------|---------------------------|------|---------|-----------|-----------|-----------|----------------------------|--|---|
|    |          | regulation of             |      |         |           |           |           |                            |  |   |
| BP | GO:00510 | DNA-binding               | 5/32 | 432/186 | 0.0007793 | 0.0045652 | 0.0020966 |                            |  |   |
|    | 90       | transcription factor      |      | 70      | 13        | 19        | 72        | AGT/STAT3/TLR4/TLR2/HMOX1  |  | 5 |
|    |          | activity                  |      |         |           |           |           |                            |  |   |
|    |          | T cell activation         |      |         |           |           |           |                            |  |   |
| BP | GO:00022 | involved in immune        | 3/32 | 106/186 | 0.0007826 | 0.0045712 | 0.0020994 |                            |  |   |
|    | 86       | response                  |      | 70      | 95        | 19        | 28        | FCER1G/STAT3/FCGR2B        |  | 3 |
|    |          | homeostasis of number     |      |         |           |           |           |                            |  |   |
| BP | GO:00488 | of cells                  | 4/32 | 246/186 | 0.0007913 | 0.0046080 | 0.0021163 |                            |  |   |
|    | 72       |                           |      | 70      | 85        | 95        | 64        | FCER1G/LYN/STAT3/HMOX1     |  | 4 |
|    |          | calcium ion transport     |      |         |           |           |           |                            |  |   |
| BP | GO:00068 |                           | 5/32 | 434/186 | 0.0007956 | 0.0046192 | 0.0021214 |                            |  |   |
|    | 16       |                           |      | 70      | 77        | 15        | 71        | AGT/LYN/PTPRC/PTPN6/CCL2   |  | 5 |
|    |          | modulation of chemical    |      |         |           |           |           |                            |  |   |
| BP | GO:00508 | synaptic transmission     | 5/32 | 436/186 | 0.0008122 | 0.0047016 | 0.0021593 |                            |  |   |
|    | 04       |                           |      | 70      | 98        | 29        | 21        | AGT/LGMN/TYROBP/STAT3/CCL2 |  | 5 |
|    |          | regulation of             |      |         |           |           |           |                            |  |   |
| BP | GO:00991 | trans-synaptic signaling  | 5/32 | 437/186 | 0.0008207 | 0.0047361 | 0.0021751 |                            |  |   |
|    | 77       |                           |      | 70      | 05        | 53        | 78        | AGT/LGMN/TYROBP/STAT3/CCL2 |  | 5 |
|    |          | cellular response to      |      |         |           |           |           |                            |  |   |
| BP | GO:00713 | growth hormone            | 2/32 | 25/1867 | 0.0008330 | 0.0047508 | 0.0021819 |                            |  |   |
|    | 78       | stimulus                  |      | 0       | 51        | 39        | 22        | LYN/STAT3                  |  | 2 |
|    |          | regulation of monocyte    |      |         |           |           |           |                            |  |   |
| BP | GO:00900 | chemotaxis                | 2/32 | 25/1867 | 0.0008330 | 0.0047508 | 0.0021819 |                            |  |   |
|    | 25       |                           |      | 0       | 51        | 39        | 22        | LGMN/LYN                   |  | 2 |
|    |          | negative regulation of    |      |         |           |           |           |                            |  |   |
| BP | GO:19033 | regulated secretory       | 2/32 | 25/1867 | 0.0008330 | 0.0047508 | 0.0021819 |                            |  |   |
|    | 06       | pathway                   |      | 0       | 51        | 39        | 22        | FCGR2B/HMOX1               |  | 2 |
|    |          | regulation of             |      |         |           |           |           |                            |  |   |
| BP | GO:20004 | interleukin-8 secretion   | 2/32 | 25/1867 | 0.0008330 | 0.0047508 | 0.0021819 |                            |  |   |
|    | 82       |                           |      | 0       | 51        | 39        | 22        | TLR2/CD14                  |  | 2 |
|    |          | regulation of calcium ion |      |         |           |           |           |                            |  |   |
| BP | GO:00519 | transport                 | 4/32 | 254/186 | 0.0008915 | 0.0050696 | 0.0023283 |                            |  |   |
|    | 24       |                           |      | 70      | 7         | 6         | 47        | AGT/LYN/PTPN6/CCL2         |  | 4 |
|    |          | positive regulation of    |      |         |           |           |           |                            |  |   |
| BP | GO:00224 | cell-cell adhesion        | 4/32 | 255/186 | 0.0009046 | 0.0051292 | 0.0023557 |                            |  |   |
|    | 09       |                           |      | 70      | 93        | 41        | 11        | LYN/PTPRC/PTPN6/CCL2       |  | 4 |
|    |          | G protein-coupled         |      |         |           |           |           |                            |  |   |
|    |          | receptor signaling        |      |         |           |           |           |                            |  |   |
| BP | GO:00071 | pathway, coupled to       | 4/32 | 256/186 | 0.0009179 | 0.0051892 | 0.0023832 |                            |  |   |
|    | 87       | cyclic nucleotide second  |      | 70      | 53        | 44        | 69        | AGT/S1PR1/PF4/CCL2         |  | 4 |
|    |          | messenger                 |      |         |           |           |           |                            |  |   |
|    |          | negative regulation of    |      |         |           |           |           |                            |  |   |
| BP | GO:00336 | kinase activity           | 4/32 | 257/186 | 0.0009313 | 0.0052496 | 0.0024110 |                            |  |   |
|    | 73       |                           |      | 70      | 49        | 7         | 21        | LYN/PTPRC/GMFG/PTPN6       |  | 4 |
|    |          | regulation of peptidase   |      |         |           |           |           |                            |  |   |
| BP | GO:00525 | activity                  | 5/32 | 452/186 | 0.0009548 | 0.0053663 | 0.0024645 |                            |  |   |
|    | 47       |                           |      | 70      | 11        | 13        | 91        | AGT/LGMN/GRN/LYN/STAT3     |  | 5 |
|    |          | positive regulation of    |      |         |           |           |           |                            |  |   |
|    |          | DNA-binding               |      |         |           |           |           |                            |  |   |
| BP | GO:00510 | transcription factor      | 4/32 | 261/186 | 0.0009863 | 0.0055273 | 0.0025385 |                            |  |   |
|    | 91       | activity                  |      | 70      | 19        | 76        | 63        | AGT/STAT3/TLR4/TLR2        |  | 4 |
|    |          | regulation of             |      |         |           |           |           |                            |  |   |
| BP | GO:19012 | NIK/NF-kappaB             | 3/32 | 117/186 | 0.0010419 |           | 0.0026621 |                            |  |   |
|    | 22       | signaling                 |      | 70      | 77        |           | 18        | TLR4/TLR2/CD14             |  | 3 |



Supplementary Table2. The details for actual gene IDs and GO descriptions

|    |          |                                                            |      |         |           |           |           |           |                           |   |
|----|----------|------------------------------------------------------------|------|---------|-----------|-----------|-----------|-----------|---------------------------|---|
| BP | GO:00454 | regulation of interleukin-6 biosynthetic process           | 2/32 | 28/1867 | 0.0010462 | 0.0026621 | 0.0057964 | 0.0026621 | TYROBP/STAT3              | 2 |
|    | 08       |                                                            |      | 0       | 82        |           | 18        |           |                           |   |
| BP | GO:00508 | antigen receptor-mediated signaling pathway                | 2/32 | 28/1867 | 0.0010462 | 0.0026621 | 0.0057964 | 0.0026621 | PTPN6/FCGR2B              | 2 |
|    | 58       |                                                            |      | 0       | 82        |           | 18        |           |                           |   |
| BP | GO:19907 | response to angiotensin                                    | 2/32 | 28/1867 | 0.0010462 | 0.0026621 | 0.0057964 | 0.0026621 | AGT/CYBB                  | 2 |
|    | 76       |                                                            |      | 0       | 82        |           | 18        |           |                           |   |
| BP | GO:00356 | TRIF-dependent toll-like receptor signaling pathway        | 2/32 | 29/1867 | 0.0011225 | 0.0061488 | 0.0028239 | 0.0028239 | TLR4/CD14                 | 2 |
|    | 66       |                                                            |      | 0       | 83        | 37        | 82        |           |                           |   |
| BP | GO:00422 | interleukin-6 biosynthetic process                         | 2/32 | 29/1867 | 0.0011225 | 0.0061488 | 0.0028239 | 0.0028239 | TYROBP/STAT3              | 2 |
|    | 26       |                                                            |      | 0       | 83        | 37        | 82        |           |                           |   |
| BP | GO:00508 | regulation of B cell receptor signaling pathway            | 2/32 | 29/1867 | 0.0011225 | 0.0061488 | 0.0028239 | 0.0028239 | LYN/FCGR2B                | 2 |
|    | 55       |                                                            |      | 0       | 83        | 37        | 82        |           |                           |   |
| BP | GO:00726 | interleukin-8 secretion                                    | 2/32 | 29/1867 | 0.0011225 | 0.0061488 | 0.0028239 | 0.0028239 | TLR2/CD14                 | 2 |
|    | 06       |                                                            |      | 0       | 83        | 37        | 82        |           |                           |   |
| BP | GO:00328 | response to insulin                                        | 4/32 | 272/186 | 0.0011492 | 0.0062771 | 0.0028829 | 0.0028829 | AGT/FABP3/LYN/TLR2        | 4 |
|    | 68       |                                                            |      | 70      | 49        | 67        | 2         |           |                           |   |
| BP | GO:00507 | regulation of protein secretion                            | 5/32 | 472/186 | 0.0011583 | 0.0063089 | 0.0028975 | 0.0028975 | LYN/TLR4/TLR2/FCGR2B/CD14 | 5 |
|    | 08       |                                                            |      | 70      | 18        | 3         | 08        |           |                           |   |
| BP | GO:00435 | endothelial cell migration                                 | 4/32 | 273/186 | 0.0011649 | 0.0063272 | 0.0029059 | 0.0029059 | AGT/LGMN/GRN/HMOX1        | 4 |
|    | 42       |                                                            |      | 70      | 42        | 33        | 14        |           |                           |   |
| BP | GO:00341 | erythrocyte homeostasis                                    | 3/32 | 122/186 | 0.0011757 | 0.0063504 | 0.0029165 | 0.0029165 | LYN/STAT3/HMOX1           | 3 |
|    | 01       |                                                            |      | 70      | 69        | 64        | 84        |           |                           |   |
| BP | GO:00435 | muscle adaptation                                          | 3/32 | 122/186 | 0.0011757 | 0.0063504 | 0.0029165 | 0.0029165 | AGT/TNFRSF1A/HMOX1        | 3 |
|    | 00       |                                                            |      | 70      | 69        | 64        | 84        |           |                           |   |
| BP | GO:00507 | positive regulation of neurogenesis                        | 5/32 | 474/186 | 0.0011803 | 0.0063572 | 0.0029197 | 0.0029197 | AGT/PLXNB2/GRN/LYN/TLR2   | 5 |
|    | 69       |                                                            |      | 70      | 12        | 93        | 2         |           |                           |   |
| BP | GO:00107 | regulation of macrophage derived foam cell differentiation | 2/32 | 30/1867 | 0.0012014 | 0.0064355 | 0.0029556 | 0.0029556 | AGT/PF4                   | 2 |
|    | 43       |                                                            |      | 0       | 82        | 63        | 67        |           |                           |   |
| BP | GO:00327 | positive regulation of interferon-beta production          | 2/32 | 30/1867 | 0.0012014 | 0.0064355 | 0.0029556 | 0.0029556 | TLR4/TLR2                 | 2 |
|    | 28       |                                                            |      | 0       | 82        | 63        | 67        |           |                           |   |
| BP | GO:00140 | regulation of phosphatidylinositol 3-kinase signaling      | 3/32 | 124/186 | 0.0012321 | 0.0065637 | 0.0030145 | 0.0030145 | AGT/LYN/PTPN6             | 3 |
|    | 66       |                                                            |      | 70      | 8         | 28        | 29        |           |                           |   |
| BP | GO:00512 | release of sequestered calcium ion into cytosol            | 3/32 | 124/186 | 0.0012321 | 0.0065637 | 0.0030145 | 0.0030145 | LYN/PTPRC/PTPN6           | 3 |
|    | 09       |                                                            |      | 70      | 8         | 28        | 29        |           |                           |   |
| BP | GO:00454 | response to ethanol                                        | 3/32 | 125/186 | 0.0012610 | 0.0066989 | 0.0030766 | 0.0030766 | STAT3/CYBB/CD14           | 3 |
|    | 71       |                                                            |      | 70      | 15        | 27        | 22        |           |                           |   |

Supplementary Table2. The details for actual gene IDs and GO descriptions

|    |          |                                                                     |      |         |           |           |           |                           |  |   |
|----|----------|---------------------------------------------------------------------|------|---------|-----------|-----------|-----------|---------------------------|--|---|
|    |          | positive regulation of cytosolic calcium ion concentration involved |      |         |           |           |           |                           |  |   |
| BP | GO:00514 | in phospholipase C-activating G protein-coupled signaling pathway   | 2/32 | 31/1867 | 0.0012829 | 0.0067609 | 0.0031051 | S1PR1/C3AR1               |  | 2 |
|    | 82       |                                                                     |      | 0       | 71        | 8         | 22        |                           |  |   |
| BP | GO:00347 | regulation of ion transmembrane transport                           | 5/32 | 483/186 | 0.0012831 | 0.0067609 | 0.0031051 | AGT/LYN/PTPN6/CYBB/CCL2   |  | 5 |
|    | 65       |                                                                     |      | 70      | 57        | 8         | 22        |                           |  |   |
| BP | GO:00708 | divalent metal ion transport                                        | 5/32 | 483/186 | 0.0012831 | 0.0067609 | 0.0031051 | AGT/LYN/PTPRC/PTPN6/CCL2  |  | 5 |
|    | 38       |                                                                     |      | 70      | 57        | 8         | 22        |                           |  |   |
| BP | GO:00324 | regulation of type I interferon production                          | 3/32 | 126/186 | 0.0012902 | 0.0067617 | 0.0031054 | TLR4/TLR2/CD14            |  | 3 |
|    | 79       |                                                                     |      | 70      | 73        | 29        | 65        |                           |  |   |
| BP | GO:00512 | negative regulation of sequestering of calcium ion                  | 3/32 | 126/186 | 0.0012902 | 0.0067617 | 0.0031054 | LYN/PTPRC/PTPN6           |  | 3 |
|    | 83       |                                                                     |      | 70      | 73        | 29        | 65        |                           |  |   |
| BP | GO:00109 | positive regulation of neuron projection development                | 4/32 | 281/186 | 0.0012959 | 0.0067732 | 0.0031107 | AGT/PLXNB2/GRN/LYN        |  | 4 |
|    | 76       |                                                                     |      | 70      | 57        | 08        | 38        |                           |  |   |
| BP | GO:00025 | platelet degranulation                                              | 3/32 | 128/186 | 0.0013500 | 0.0069994 | 0.0032146 | FCER1G/LYN/PF4            |  | 3 |
|    | 76       |                                                                     |      | 70      | 68        | 17        | 29        |                           |  |   |
| BP | GO:00326 | type I interferon production                                        | 3/32 | 128/186 | 0.0013500 | 0.0069994 | 0.0032146 | TLR4/TLR2/CD14            |  | 3 |
|    | 06       |                                                                     |      | 70      | 68        | 17        | 29        |                           |  |   |
| BP | GO:00512 | regulation of sequestering of calcium ion                           | 3/32 | 128/186 | 0.0013500 | 0.0069994 | 0.0032146 | LYN/PTPRC/PTPN6           |  | 3 |
|    | 82       |                                                                     |      | 70      | 68        | 17        | 29        |                           |  |   |
| BP | GO:00725 | divalent inorganic cation transport                                 | 5/32 | 489/186 | 0.0013553 | 0.0070079 | 0.0032185 | AGT/LYN/PTPRC/PTPN6/CCL2  |  | 5 |
|    | 11       |                                                                     |      | 70      | 26        | 41        | 43        |                           |  |   |
| BP | GO:00513 | negative regulation of transferase activity                         | 4/32 | 285/186 | 0.0013651 | 0.0070310 | 0.0032291 | LYN/PTPRC/GMFG/PTPN6      |  | 4 |
|    | 48       |                                                                     |      | 70      | 96        | 08        | 38        |                           |  |   |
| BP | GO:00550 | response to lipoprotein particle                                    | 2/32 | 32/1867 | 0.0013670 | 0.0070310 | 0.0032291 | FCER1G/TLR4               |  | 2 |
|    | 94       |                                                                     |      | 0       | 4         | 08        | 38        |                           |  |   |
| BP | GO:00071 | negative regulation of cell adhesion                                | 4/32 | 289/186 | 0.0014369 | 0.0073594 | 0.0033800 | PLXNB2/PTPRC/PTPN6/FCGR2B |  | 4 |
|    | 62       |                                                                     |      | 70      | 89        | 98        | 04        |                           |  |   |
| BP | GO:00301 | B cell differentiation                                              | 3/32 | 131/186 | 0.0014429 | 0.0073594 | 0.0033800 | PTPRC/PTPN6/FCGR2B        |  | 3 |
|    | 83       |                                                                     |      | 70      | 92        | 98        | 04        |                           |  |   |
| BP | GO:00512 | sequestering of calcium ion                                         | 3/32 | 131/186 | 0.0014429 | 0.0073594 | 0.0033800 | LYN/PTPRC/PTPN6           |  | 3 |
|    | 08       |                                                                     |      | 70      | 92        | 98        | 04        |                           |  |   |
| BP | GO:00019 | regulation of T cell mediated cytotoxicity                          | 2/32 | 33/1867 | 0.0014536 | 0.0073594 | 0.0033800 | PTPRC/FCGR2B              |  | 2 |
|    | 14       |                                                                     |      | 0       | 81        | 98        | 04        |                           |  |   |
| BP | GO:00027 | MyD88-independent toll-like receptor signaling pathway              | 2/32 | 33/1867 | 0.0014536 | 0.0073594 | 0.0033800 | TLR4/CD14                 |  | 2 |
|    | 56       |                                                                     |      | 0       | 81        | 98        | 04        |                           |  |   |
| BP | GO:19018 | positive regulation of cell junction assembly                       | 2/32 | 33/1867 | 0.0014536 | 0.0073594 | 0.0033800 | AGT/S100A10               |  | 2 |
|    | 90       |                                                                     |      | 0       | 81        | 98        | 04        |                           |  |   |

Supplementary Table2. The details for actual gene IDs and GO descriptions

|    |          |                                                                            |      |         |           |           |           |                           |   |
|----|----------|----------------------------------------------------------------------------|------|---------|-----------|-----------|-----------|---------------------------|---|
| BP | GO:00106 | regulation of epithelial cell migration                                    | 4/32 | 291/186 | 0.0014738 | 0.0074422 | 0.0034179 | AGT/LGMN/GRN/HMOX1        | 4 |
|    | 32       |                                                                            |      | 70      | 59        | 21        | 96        |                           |   |
| BP | GO:00109 | regulation of neuron projection development                                | 5/32 | 499/186 | 0.0014822 | 0.0074651 | 0.0034285 | AGT/PLXNB2/GRN/LYN/VIM    | 5 |
|    | 75       |                                                                            |      | 70      | 52        | 61        | 31        |                           |   |
| BP | GO:00027 | regulation of peptide secretion                                            | 5/32 | 500/186 | 0.0014954 | 0.0075119 | 0.0034500 | LYN/TLR4/TLR2/FCGR2B/CD14 | 5 |
|    | 91       |                                                                            |      | 70      | 12        | 28        | 1         |                           |   |
| BP | GO:00328 | positive regulation of organic acid transport                              | 2/32 | 34/1867 | 0.0015428 | 0.0076709 | 0.0035230 | AGT/FABP3                 | 2 |
|    | 92       |                                                                            |      | 0       | 86        | 15        | 28        |                           |   |
| BP | GO:00433 | positive T cell selection                                                  | 2/32 | 34/1867 | 0.0015428 | 0.0076709 | 0.0035230 | PTPRC/STAT3               | 2 |
|    | 68       |                                                                            |      | 0       | 86        | 15        | 28        |                           |   |
| BP | GO:00459 | negative regulation of exocytosis                                          | 2/32 | 34/1867 | 0.0015428 | 0.0076709 | 0.0035230 | FCGR2B/HMOX1              | 2 |
|    | 20       |                                                                            |      | 0       | 86        | 15        | 28        |                           |   |
| BP | GO:00714 | cellular response to lipoprotein particle stimulus                         | 2/32 | 34/1867 | 0.0015428 | 0.0076709 | 0.0035230 | FCER1G/TLR4               | 2 |
|    | 02       |                                                                            |      | 0       | 86        | 15        | 28        |                           |   |
| BP | GO:00509 | positive regulation of chemotaxis                                          | 3/32 | 135/186 | 0.0015730 | 0.0078007 | 0.0035826 | S1PR1/LGMN/C3AR1          | 3 |
|    | 21       |                                                                            |      | 70      | 2         | 31        | 49        |                           |   |
| BP | GO:00027 | negative regulation of production of molecular mediator of immune response | 2/32 | 35/1867 | 0.0016346 | 0.0080446 | 0.0036946 | FCGR2B/HMOX1              | 2 |
|    | 01       |                                                                            |      | 0       | 47        | 2         | 6         |                           |   |
| BP | GO:00327 | positive regulation of interleukin-12 production                           | 2/32 | 35/1867 | 0.0016346 | 0.0080446 | 0.0036946 | TLR4/TLR2                 | 2 |
|    | 35       |                                                                            |      | 0       | 47        | 2         | 6         |                           |   |
| BP | GO:00987 | bone cell development                                                      | 2/32 | 35/1867 | 0.0016346 | 0.0080446 | 0.0036946 | TYROBP/PTPN6              | 2 |
|    | 51       |                                                                            |      | 0       | 47        | 2         | 6         |                           |   |
| BP | GO:00345 | cellular response to oxidative stress                                      | 4/32 | 302/186 | 0.0016885 | 0.0082889 | 0.0038068 | TLR4/CYBB/HMOX1/LCN2      | 4 |
|    | 99       |                                                                            |      | 70      | 68        | 44        | 71        |                           |   |
| BP | GO:00507 | positive regulation of cytokine secretion                                  | 3/32 | 139/186 | 0.0017101 | 0.0083527 | 0.0038361 | TLR4/TLR2/CD14            | 3 |
|    | 15       |                                                                            |      | 70      | 86        | 71        | 85        |                           |   |
| BP | GO:00706 | positive regulation of leukocyte proliferation                             | 3/32 | 139/186 | 0.0017101 | 0.0083527 | 0.0038361 | LYN/PTPRC/TLR4            | 3 |
|    | 65       |                                                                            |      | 70      | 86        | 71        | 85        |                           |   |
| BP | GO:00107 | macrophage derived foam cell differentiation                               | 2/32 | 36/1867 | 0.0017289 | 0.0083811 | 0.0038491 | AGT/PF4                   | 2 |
|    | 42       |                                                                            |      | 0       | 54        | 05        | 98        |                           |   |
| BP | GO:00900 | foam cell differentiation                                                  | 2/32 | 36/1867 | 0.0017289 | 0.0083811 | 0.0038491 | AGT/PF4                   | 2 |
|    | 77       |                                                                            |      | 0       | 54        | 05        | 98        |                           |   |
| BP | GO:00903 | regulation of superoxide metabolic process                                 | 2/32 | 36/1867 | 0.0017289 | 0.0083811 | 0.0038491 | AGT/TYROBP                | 2 |
|    | 22       |                                                                            |      | 0       | 54        | 05        | 98        |                           |   |
| BP | GO:00975 | calcium ion transmembrane import into cytosol                              | 3/32 | 140/186 | 0.0017456 | 0.0084407 | 0.0038765 | LYN/PTPRC/PTPN6           | 3 |
|    | 53       |                                                                            |      | 70      | 09        | 38        | 85        |                           |   |
| BP | GO:00027 | positive regulation of B cell mediated immunity                            | 2/32 | 37/1867 | 0.0018258 | 0.0087412 | 0.0040146 | FCER1G/PTPRC              | 2 |
|    | 14       |                                                                            |      | 0       |           | 97        | 24        |                           |   |
| BP | GO:00028 | positive regulation of                                                     | 2/32 | 37/1867 | 0.0018258 | 0.0087412 | 0.0040146 | FCER1G/PTPRC              | 2 |

Supplementary Table2. The details for actual gene IDs and GO descriptions

|    |          |                                                                |      |         |           |           |           |                         |   |
|----|----------|----------------------------------------------------------------|------|---------|-----------|-----------|-----------|-------------------------|---|
|    | 91       | immunoglobulin mediated immune response                        | 0    | 97      | 24        |           |           |                         |   |
| BP | GO:00457 | respiratory burst                                              | 2/32 | 37/1867 | 0.0018258 | 0.0087412 | 0.0040146 | GRN/CYBB                | 2 |
|    | 30       |                                                                |      | 0       | 97        | 24        |           |                         |   |
| BP | GO:00712 | cellular response to cadmium ion                               | 2/32 | 37/1867 | 0.0018258 | 0.0087412 | 0.0040146 | CYBB/HMOX1              | 2 |
|    | 76       |                                                                |      | 0       | 97        | 24        |           |                         |   |
| BP | GO:19021 | positive regulation of leukocyte differentiation               | 3/32 | 144/186 | 0.0018918 | 0.0090354 | 0.0041497 | TYROBP/PTPRC/PF4        | 3 |
|    | 07       |                                                                |      | 70      | 95        | 31        | 11        |                         |   |
| BP | GO:00346 | response to tumor necrosis factor                              | 4/32 | 312/186 | 0.0019018 | 0.0090608 | 0.0041613 | TNFRSF1A/CD14/LCN2/CCL2 | 4 |
|    | 12       |                                                                |      | 70      | 95        | 7         | 94        |                         |   |
| BP | GO:00482 | macrophage chemotaxis                                          | 2/32 | 38/1867 | 0.0019251 | 0.0091257 | 0.0041911 | C3AR1/CCL2              | 2 |
|    | 46       |                                                                |      | 0       | 75        | 18        | 77        |                         |   |
| BP | GO:00604 | response to growth hormone                                     | 2/32 | 38/1867 | 0.0019251 | 0.0091257 | 0.0041911 | LYN/STAT3               | 2 |
|    | 16       |                                                                |      | 0       | 75        | 18        | 77        |                         |   |
| BP | GO:00076 | learning                                                       | 3/32 | 145/186 | 0.0019296 | 0.0091257 | 0.0041911 | AGT/LGMN/TLR2           | 3 |
|    | 12       |                                                                |      | 70      | 26        | 18        | 77        |                         |   |
| BP | GO:00310 | stress-activated protein kinase signaling cascade              | 4/32 | 315/186 | 0.0019693 | 0.0092910 | 0.0042671 | AGT/LYN/TLR4/FCGR2B     | 4 |
|    | 98       |                                                                |      | 70      | 83        | 81        | 23        |                         |   |
| BP | GO:00140 | phosphatidylinositol 3-kinase signaling                        | 3/32 | 148/186 | 0.0020456 | 0.0096040 | 0.0044108 | AGT/LYN/PTPN6           | 3 |
|    | 65       |                                                                |      | 70      | 33        | 72        | 71        |                         |   |
| BP | GO:00610 | regulation of wound healing                                    | 3/32 | 148/186 | 0.0020456 | 0.0096040 | 0.0044108 | FCER1G/LYN/TLR4         | 3 |
|    | 41       |                                                                |      | 70      | 33        | 72        | 71        |                         |   |
|    |          | humoral immune response mediated by circulating immunoglobulin |      |         |           |           |           |                         |   |
| BP | GO:00024 | response mediated by circulating immunoglobulin                | 3/32 | 150/186 | 0.0021253 | 0.0099349 | 0.0045628 | PTPRC/PTPN6/FCGR2B      | 3 |
|    | 55       |                                                                |      | 70      | 37        | 6         | 38        |                         |   |
|    |          | negative regulation of cytokine biosynthetic process           |      |         |           |           |           |                         |   |
| BP | GO:00420 | negative regulation of cytokine biosynthetic process           | 2/32 | 40/1867 | 0.0021314 | 0.0099349 | 0.0045628 | TYROBP/PTPRC            | 2 |
|    | 36       |                                                                |      | 0       | 82        | 6         | 38        |                         |   |
|    |          | regulation of protein localization to cell surface             |      |         |           |           |           |                         |   |
| BP | GO:20000 | regulation of protein localization to cell surface             | 2/32 | 40/1867 | 0.0021314 | 0.0099349 | 0.0045628 | FCER1G/TYROBP           | 2 |
|    | 08       |                                                                |      | 0       | 82        | 6         | 38        |                         |   |
|    |          | positive regulation of B cell proliferation                    |      |         |           |           |           |                         |   |
| BP | GO:00308 | positive regulation of B cell proliferation                    | 2/32 | 41/1867 | 0.0022383 | 0.0103585 | 0.0047574 | PTPRC/TLR4              | 2 |
|    | 90       |                                                                |      | 0       | 97        | 94        | 01        |                         |   |
|    |          | regulation of neuroinflammatory response                       |      |         |           |           |           |                         |   |
| BP | GO:01500 | regulation of neuroinflammatory response                       | 2/32 | 41/1867 | 0.0022383 | 0.0103585 | 0.0047574 | GRN/PTPRC               | 2 |
|    | 77       |                                                                |      | 0       | 97        | 94        | 01        |                         |   |
|    |          | regulation of extracellular matrix organization                |      |         |           |           |           |                         |   |
| BP | GO:19030 | regulation of extracellular matrix organization                | 2/32 | 41/1867 | 0.0022383 | 0.0103585 | 0.0047574 | AGT/TNFRSF1A            | 2 |
|    | 53       |                                                                |      | 0       | 97        | 94        | 01        |                         |   |
|    |          | neurotransmitter metabolic process                             |      |         |           |           |           |                         |   |
| BP | GO:00421 | neurotransmitter metabolic process                             | 3/32 | 153/186 | 0.0022484 | 0.0103805 | 0.0047674 | AGT/TLR4/TLR2           | 3 |
|    | 33       |                                                                |      | 70      | 85        | 07        | 65        |                         |   |
| BP | GO:00512 | maintenance of location                                        | 4/32 | 330/186 | 0.0023319 | 0.0107403 | 0.0049327 | LYN/PTPRC/PTPN6/LCN2    | 4 |

Supplementary Table2. The details for actual gene IDs and GO descriptions

|    | 35       |                                                          | 70   | 66      | 37        | 24        |           |                      |   |
|----|----------|----------------------------------------------------------|------|---------|-----------|-----------|-----------|----------------------|---|
| BP | GO:00970 | dendritic cell differentiation                           | 2/32 | 42/1867 | 0.0023478 | 0.0107621 | 0.0049427 | LYN/FCGR2B           | 2 |
| BP | GO:20012 | regulation of neuron migration                           | 2/32 | 42/1867 | 0.0023478 | 0.0107621 | 0.0049427 | PLXNB2/STAT3         | 2 |
| BP | GO:00454 | positive regulation of nitric oxide biosynthetic process | 2/32 | 43/1867 | 0.0024597 | 0.0112390 | 0.0051617 | AGT/TLR4             | 2 |
| BP | GO:00604 | calcium ion transport into cytosol                       | 3/32 | 158/186 | 0.0024634 | 0.0112390 | 0.0051617 | LYN/PTPRC/PTPN6      | 3 |
| BP | GO:00026 | regulation of acute inflammatory response                | 3/32 | 159/186 | 0.0025079 | 0.0114150 | 0.0052426 | FCER1G/C3AR1/FCGR2B  | 3 |
| BP | GO:00434 | regulation of MAP kinase activity                        | 4/32 | 337/186 | 0.0025160 | 0.0114251 | 0.0052472 | LYN/PTPRC/TLR4/PTPN6 | 4 |
| BP | GO:00140 | oligodendrocyte development                              | 2/32 | 44/1867 | 0.0025740 | 0.0115804 | 0.0053185 | LYN/TLR2             | 2 |
| BP | GO:00302 | macrophage differentiation                               | 2/32 | 44/1867 | 0.0025740 | 0.0115804 | 0.0053185 | TLR2/PF4             | 2 |
| BP | GO:00702 | necroptotic process                                      | 2/32 | 44/1867 | 0.0025740 | 0.0115804 | 0.0053185 | TLR4/CD14            | 2 |
| BP | GO:19044 | positive regulation of nitric oxide metabolic process    | 2/32 | 44/1867 | 0.0025740 | 0.0115804 | 0.0053185 | AGT/TLR4             | 2 |
| BP | GO:19040 | regulation of cation transmembrane transport             | 4/32 | 342/186 | 0.0026534 | 0.0119098 | 0.0054698 | AGT/LYN/PTPN6/CCL2   | 4 |
| BP | GO:00011 | response to acid chemical                                | 4/32 | 343/186 | 0.0026815 | 0.0120081 | 0.0055149 | FABP3/LYN/TLR2/CYBB  | 4 |
| BP | GO:19002 | regulation of long-term synaptic potentiation            | 2/32 | 45/1867 | 0.0026909 | 0.0120224 | 0.0055215 | LGMN/TYROBP          | 2 |
| BP | GO:00024 | inflammatory response to antigenic stimulus              | 2/32 | 46/1867 | 0.0028102 | 0.0124692 | 0.0057267 | FCER1G/FCGR2B        | 2 |
| BP | GO:00336 | regulation of cell adhesion mediated by integrin         | 2/32 | 46/1867 | 0.0028102 | 0.0124692 | 0.0057267 | LYN/PTPN6            | 2 |
| BP | GO:00432 | apoptotic cell clearance                                 | 2/32 | 46/1867 | 0.0028102 | 0.0124692 | 0.0057267 | TYROBP/CCL2          | 2 |
| BP | GO:00106 | epithelial cell migration                                | 4/32 | 351/186 | 0.0029137 | 0.0128915 | 0.0059207 | AGT/LGMN/GRN/HMOX1   | 4 |
| BP | GO:00508 | positive regulation of synaptic transmission             | 3/32 | 168/186 | 0.0029306 | 0.0128915 | 0.0059207 | LGMN/TYROBP/CCL2     | 3 |
| BP | GO:00450 | T cell selection                                         | 2/32 | 47/1867 | 0.0029320 | 0.0128915 | 0.0059207 | PTPRC/STAT3          | 2 |
| BP | GO:00456 | regulation of erythrocyte differentiation                | 2/32 | 47/1867 | 0.0029320 | 0.0128915 | 0.0059207 | LYN/STAT3            | 2 |

Supplementary Table2. The details for actual gene IDs and GO descriptions

|    |          |                                                                          |      |         |           |           |           |                           |   |
|----|----------|--------------------------------------------------------------------------|------|---------|-----------|-----------|-----------|---------------------------|---|
| BP | GO:00024 | lymphocyte mediated immunity                                             | 4/32 | 352/186 | 0.0029437 | 0.0129137 | 0.0059309 | FCER1G/PTPRC/PTPN6/FCGR2B | 4 |
|    | 49       |                                                                          |      | 70      | 17        | 29        |           |                           |   |
| BP | GO:00380 | Fc-epsilon receptor signaling pathway                                    | 3/32 | 169/186 | 0.0029801 | 0.0130146 | 0.0059772 | FCER1G/LYN/LCP2           | 3 |
|    | 95       |                                                                          |      | 70      | 45        | 42        | 47        |                           |   |
| BP | GO:00486 | regulation of smooth muscle cell proliferation                           | 3/32 | 169/186 | 0.0029801 | 0.0130146 | 0.0059772 | AGT/S1PR1/HMOX1           | 3 |
|    | 60       |                                                                          |      | 70      | 45        | 42        | 47        |                           |   |
| BP | GO:00901 | epithelium migration                                                     | 4/32 | 354/186 | 0.0030042 | 0.0130905 | 0.0060121 | AGT/LGMN/GRN/HMOX1        | 4 |
|    | 32       |                                                                          |      | 70      | 84        | 76        | 21        |                           |   |
| BP | GO:00027 | negative regulation of myeloid leukocyte differentiation                 | 2/32 | 48/1867 | 0.0030562 | 0.0131689 | 0.0060481 | LYN/TLR4                  | 2 |
|    | 62       |                                                                          |      | 0       | 34        | 72        | 26        |                           |   |
| BP | GO:00326 | regulation of interferon-beta production                                 | 2/32 | 48/1867 | 0.0030562 | 0.0131689 | 0.0060481 | TLR4/TLR2                 | 2 |
|    | 48       |                                                                          |      | 0       | 34        | 72        | 26        |                           |   |
| BP | GO:01010 | vascular endothelial cell proliferation                                  | 2/32 | 48/1867 | 0.0030562 | 0.0131689 | 0.0060481 | STAT3/CCL2                | 2 |
|    | 23       |                                                                          |      | 0       | 34        | 72        | 26        |                           |   |
| BP | GO:19037 | positive regulation of phospholipid metabolic process                    | 2/32 | 48/1867 | 0.0030562 | 0.0131689 | 0.0060481 | FABP3/LYN                 | 2 |
|    | 27       |                                                                          |      | 0       | 34        | 72        | 26        |                           |   |
| BP | GO:19055 | regulation of vascular endothelial cell proliferation                    | 2/32 | 48/1867 | 0.0030562 | 0.0131689 | 0.0060481 | STAT3/CCL2                | 2 |
|    | 62       |                                                                          |      | 0       | 34        | 72        | 26        |                           |   |
| BP | GO:00486 | smooth muscle cell proliferation                                         | 3/32 | 171/186 | 0.0030807 | 0.0132156 | 0.0060695 | AGT/S1PR1/HMOX1           | 3 |
|    | 59       |                                                                          |      | 70      | 07        | 88        | 81        |                           |   |
| BP | GO:00604 | cytosolic calcium ion transport                                          | 3/32 | 171/186 | 0.0030807 | 0.0132156 | 0.0060695 | LYN/PTPRC/PTPN6           | 3 |
|    | 01       |                                                                          |      | 70      | 07        | 88        | 81        |                           |   |
| BP | GO:00019 | T cell mediated cytotoxicity                                             | 2/32 | 49/1867 | 0.0031828 | 0.0134770 | 0.0061896 | PTPRC/FCGR2B              | 2 |
|    | 13       |                                                                          |      | 0       | 88        | 7         | 26        |                           |   |
| BP | GO:00026 | negative regulation of leukocyte migration                               | 2/32 | 49/1867 | 0.0031828 | 0.0134770 | 0.0061896 | HMOX1/CCL2                | 2 |
|    | 86       |                                                                          |      | 0       | 88        | 7         | 26        |                           |   |
| BP | GO:00973 | programmed necrotic cell death                                           | 2/32 | 49/1867 | 0.0031828 | 0.0134770 | 0.0061896 | TLR4/CD14                 | 2 |
|    | 00       |                                                                          |      | 0       | 88        | 7         | 26        |                           |   |
| BP | GO:20012 | positive regulation of extrinsic apoptotic signaling pathway             | 2/32 | 49/1867 | 0.0031828 | 0.0134770 | 0.0061896 | AGT/PTPRC                 | 2 |
|    | 38       |                                                                          |      | 0       | 88        | 7         | 26        |                           |   |
| BP | GO:00016 | temperature homeostasis                                                  | 3/32 | 173/186 | 0.0031833 | 0.0134770 | 0.0061896 | STAT3/TLR4/LCN2           | 3 |
|    | 59       |                                                                          |      | 70      | 41        | 7         | 26        |                           |   |
| BP | GO:00703 | positive regulation of stress-activated protein kinase signaling cascade | 3/32 | 173/186 | 0.0031833 | 0.0134770 | 0.0061896 | LYN/TLR4/FCGR2B           | 3 |
|    | 04       |                                                                          |      | 70      | 41        | 7         | 26        |                           |   |
| BP | GO:00901 | tissue migration                                                         | 4/32 | 360/186 | 0.0031911 | 0.0134805 | 0.0061912 | AGT/LGMN/GRN/HMOX1        | 4 |
|    | 30       |                                                                          |      | 70      | 16        | 55        | 27        |                           |   |
| BP | GO:00458 | positive regulation of proteolysis                                       | 4/32 | 363/186 | 0.0032874 | 0.0138573 | 0.0063642 | LGMN/GRN/LYN/STAT3        | 4 |
|    | 62       |                                                                          |      | 70      | 57        | 45        | 76        |                           |   |

Supplementary Table2. The details for actual gene IDs and GO descriptions

|    |          |                                                                |      |         |           |           |           |                      |   |
|----|----------|----------------------------------------------------------------|------|---------|-----------|-----------|-----------|----------------------|---|
| BP | GO:00326 | interferon-beta<br>production                                  | 2/32 | 50/1867 | 0.0033119 | 0.0139002 | 0.0063839 | TLR4/TLR2            | 2 |
|    | 08       |                                                                |      | 0       | 72        | 45        | 78        |                      |   |
| BP | GO:19037 | positive regulation of<br>anion transport                      | 2/32 | 50/1867 | 0.0033119 | 0.0139002 | 0.0063839 | AGT/FABP3            | 2 |
|    | 93       |                                                                |      | 0       | 72        | 45        | 78        |                      |   |
| BP | GO:00100 | response to metal ion                                          | 4/32 | 364/186 | 0.0033200 | 0.0139038 | 0.0063856 | LGMN/CYBB/HMOX1/CD14 | 4 |
|    | 38       |                                                                |      | 70      | 08        | 8         | 48        |                      |   |
| BP | GO:00019 | regulation of endothelial<br>cell proliferation                | 3/32 | 176/186 | 0.0033412 | 0.0139324 | 0.0063987 | STAT3/HMOX1/CCL2     | 3 |
|    | 36       |                                                                |      | 70      | 06        | 72        | 79        |                      |   |
| BP | GO:00094 | response to heat                                               | 3/32 | 176/186 | 0.0033412 | 0.0139324 | 0.0063987 | LYN/HMOX1/CD14       | 3 |
|    | 08       |                                                                |      | 70      | 06        | 72        | 79        |                      |   |
| BP | GO:00019 | regulation of<br>cytokine-mediated<br>signaling pathway        | 3/32 | 177/186 | 0.0033948 | 0.0141259 | 0.0064876 | PTPRC/TNFRSF1A/PTPN6 | 3 |
|    | 59       |                                                                |      | 70      | 79        | 03        | 17        |                      |   |
| BP | GO:00481 | positive regulation of<br>fibroblast proliferation             | 2/32 | 51/1867 | 0.0034434 |           | 0.0065630 | AGT/S100A6           | 2 |
|    | 46       |                                                                |      | 0       | 78        |           | 27        |                      |   |
| BP | GO:00109 | positive regulation of<br>endopeptidase activity               | 3/32 | 178/186 | 0.0034490 |           | 0.0065630 | LGMN/LYN/STAT3       | 3 |
|    | 50       |                                                                |      | 70      | 8         |           | 27        |                      |   |
| BP | GO:00356 | cellular response to drug                                      | 4/32 | 369/186 | 0.0034860 | 0.0144126 | 0.0066192 | VIM/CYBB/HMOX1/LCN2  | 4 |
|    | 90       |                                                                |      | 70      | 86        | 24        | 99        |                      |   |
| BP | GO:00456 | positive regulation of<br>neuron differentiation               | 4/32 | 371/186 | 0.0035540 | 0.0146624 | 0.0067340 | AGT/PLXNB2/GRN/LYN   | 4 |
|    | 66       |                                                                |      | 70      | 8         | 69        | 46        |                      |   |
| BP | GO:00327 | positive regulation of<br>interleukin-1 beta<br>production     | 2/32 | 52/1867 | 0.0035773 | 0.0147273 | 0.0067638 | TYROBP/TLR4          | 2 |
|    | 31       |                                                                |      | 0       | 98        | 36        | 37        |                      |   |
| BP | GO:00480 | phosphatidylinositol-me<br>diated signaling                    | 3/32 | 181/186 | 0.0036148 | 0.0148500 | 0.0068202 | AGT/LYN/PTPN6        | 3 |
|    | 15       |                                                                |      | 70      | 7         | 69        | 05        |                      |   |
| BP | GO:00327 | negative regulation of<br>interleukin-6 production             | 2/32 | 53/1867 | 0.0037137 | 0.0151545 | 0.0069600 | TLR4/PTPN6           | 2 |
|    | 15       |                                                                |      | 0       | 24        | 57        | 47        |                      |   |
| BP | GO:00507 | negative regulation of<br>peptidyl-tyrosine<br>phosphorylation | 2/32 | 53/1867 | 0.0037137 | 0.0151545 | 0.0069600 | PTPRC/PTPN6          | 2 |
|    | 32       |                                                                |      | 0       | 24        | 57        | 47        |                      |   |
| BP | GO:19055 | macrophage migration                                           | 2/32 | 53/1867 | 0.0037137 | 0.0151545 | 0.0069600 | C3AR1/CCL2           | 2 |
|    | 17       |                                                                |      | 0       | 24        | 57        | 47        |                      |   |
| BP | GO:00380 | NIK/NF-kappaB<br>signaling                                     | 3/32 | 183/186 | 0.0037280 | 0.0151545 | 0.0069600 | TLR4/TLR2/CD14       | 3 |
|    | 61       |                                                                |      | 70      | 68        | 57        | 47        |                      |   |
| BP | GO:00431 | I-kappaB<br>kinase/NF-kappaB<br>signaling                      | 3/32 | 183/186 | 0.0037280 | 0.0151545 | 0.0069600 | TLR4/TNFRSF1A/HMOX1  | 3 |
|    | 23       |                                                                |      | 70      | 68        | 57        | 47        |                      |   |
| BP | GO:00480 | inositol lipid-mediated<br>signaling                           | 3/32 | 184/186 | 0.0037854 | 0.0153557 | 0.0070524 | AGT/LYN/PTPN6        | 3 |
|    | 17       |                                                                |      | 70      | 74        | 18        | 35        |                      |   |
| BP | GO:00506 | regulation of epithelial<br>cell proliferation                 | 4/32 | 378/186 | 0.0037991 | 0.0153792 | 0.0070632 | GRN/STAT3/HMOX1/CCL2 | 4 |
|    | 78       |                                                                |      | 70      | 98        | 16        | 26        |                      |   |
| BP | GO:00027 | positive regulation of                                         | 2/32 | 54/1867 | 0.0038524 | 0.0154977 | 0.0071176 | FCER1G/TLR4          | 2 |

Supplementary Table2. The details for actual gene IDs and GO descriptions

|    |          |                                                       |                                                                           |      |         |           |           |           |                    |   |
|----|----------|-------------------------------------------------------|---------------------------------------------------------------------------|------|---------|-----------|-----------|-----------|--------------------|---|
|    | 20       | cytokine production<br>involved in immune<br>response |                                                                           | 0    | 48      | 12        | 48        |           |                    |   |
| BP | GO:00027 | 63                                                    | positive regulation of<br>myeloid leukocyte<br>differentiation            | 2/32 | 54/1867 | 0.0038524 | 0.0154977 | 0.0071176 | TYROBP/PF4         | 2 |
| BP | GO:00326 | 55                                                    | regulation of<br>interleukin-12<br>production                             | 2/32 | 54/1867 | 0.0038524 | 0.0154977 | 0.0071176 | TLR4/TLR2          | 2 |
| BP | GO:00481 | 67                                                    | regulation of synaptic<br>plasticity                                      | 3/32 | 187/186 | 0.0039609 | 0.0159011 | 0.0073029 | AGT/LGMN/TYROBP    | 3 |
| BP | GO:00019 | 12                                                    | positive regulation of<br>leukocyte mediated<br>cytotoxicity              | 2/32 | 56/1867 | 0.0041370 | 0.0164886 | 0.0075727 | TYROBP/PTPRC       | 2 |
| BP | GO:00312 | 95                                                    | T cell costimulation                                                      | 2/32 | 56/1867 | 0.0041370 | 0.0164886 | 0.0075727 | LYN/PTPN6          | 2 |
| BP | GO:00326 | 15                                                    | interleukin-12<br>production                                              | 2/32 | 56/1867 | 0.0041370 | 0.0164886 | 0.0075727 | TLR4/TLR2          | 2 |
| BP | GO:00712 | 48                                                    | cellular response to<br>metal ion                                         | 3/32 | 190/186 | 0.0041412 | 0.0164886 | 0.0075727 | LGMN/CYBB/HMOX1    | 3 |
| BP | GO:00019 | 35                                                    | endothelial cell<br>proliferation                                         | 3/32 | 191/186 | 0.0042025 | 0.0166981 | 0.0076689 | STAT3/HMOX1/CCL2   | 3 |
| BP | GO:00312 | 94                                                    | lymphocyte<br>costimulation                                               | 2/32 | 57/1867 | 0.0042829 | 0.0168450 | 0.0077364 | LYN/PTPN6          | 2 |
| BP | GO:00427 | 43                                                    | hydrogen peroxide<br>metabolic process                                    | 2/32 | 57/1867 | 0.0042829 | 0.0168450 | 0.0077364 | STAT3/CYBB         | 2 |
| BP | GO:00435 | 25                                                    | positive regulation of<br>neuron apoptotic process                        | 2/32 | 57/1867 | 0.0042829 | 0.0168450 | 0.0077364 | GRN/TYROBP         | 2 |
| BP | GO:00607 | 60                                                    | positive regulation of<br>response to cytokine<br>stimulus                | 2/32 | 57/1867 | 0.0042829 | 0.0168450 | 0.0077364 | TLR4/TLR2          | 2 |
| BP | GO:19034 | 28                                                    | positive regulation of<br>reactive oxygen species<br>biosynthetic process | 2/32 | 57/1867 | 0.0042829 | 0.0168450 | 0.0077364 | AGT/TLR4           | 2 |
| BP | GO:00109 | 59                                                    | regulation of metal ion<br>transport                                      | 4/32 | 394/186 | 0.0044022 | 0.0172793 | 0.0079359 | AGT/LYN/PTPN6/CCL2 | 4 |
| BP | GO:00327 | 32                                                    | positive regulation of<br>interleukin-1 production                        | 2/32 | 59/1867 | 0.0045817 | 0.0178393 | 0.0081931 | TYROBP/TLR4        | 2 |
| BP | GO:00328 | 90                                                    | regulation of organic<br>acid transport                                   | 2/32 | 59/1867 | 0.0045817 | 0.0178393 | 0.0081931 | AGT/FABP3          | 2 |
| BP | GO:00705 | 27                                                    | platelet aggregation                                                      | 2/32 | 59/1867 | 0.0045817 | 0.0178393 | 0.0081931 | LYN/PTPN6          | 2 |
| BP | GO:00977 | 55                                                    | positive regulation of<br>blood vessel diameter                           | 2/32 | 59/1867 | 0.0045817 | 0.0178393 | 0.0081931 | AGT/HMOX1          | 2 |



Supplementary Table2. The details for actual gene IDs and GO descriptions

|    |          |                                                      |      |         |           |           |           |                         |   |
|----|----------|------------------------------------------------------|------|---------|-----------|-----------|-----------|-------------------------|---|
| BP | GO:00068 | cellular iron ion homeostasis                        | 2/32 | 61/1867 | 0.0048899 | 0.0189831 | 0.0087183 | HMOX1/LCN2              | 2 |
|    | 79       |                                                      |      | 0       | 75        | 19        | 94        |                         |   |
| BP | GO:20012 | regulation of apoptotic signaling pathway            | 4/32 | 406/186 | 0.0048950 | 0.0189831 | 0.0087183 | AGT/PTPRC/PF4/HMOX1     | 4 |
|    | 33       |                                                      |      | 70      | 8         | 19        | 94        |                         |   |
| BP | GO:00508 | T cell receptor signaling pathway                    | 3/32 | 202/186 | 0.0049125 | 0.0190129 | 0.0087320 | PTPRC/LCP2/PTPN6        | 3 |
|    | 52       |                                                      |      | 70      | 78        | 52        | 96        |                         |   |
| BP | GO:00508 | synapse organization                                 | 4/32 | 408/186 | 0.0049806 | 0.0192381 | 0.0088355 | LGMN/PLXNB2/TLR2/FCGR2B | 4 |
|    | 08       |                                                      |      | 70      | 85        | 43        | 19        |                         |   |
| BP | GO:00326 | interleukin-2 production                             | 2/32 | 62/1867 | 0.0050475 | 0.0194192 | 0.0089186 | FCER1G/PTPRC            | 2 |
|    | 23       |                                                      |      | 0       | 91        | 04        | 76        |                         |   |
| BP | GO:00702 | necrotic cell death                                  | 2/32 | 62/1867 | 0.0050475 | 0.0194192 | 0.0089186 | TLR4/CD14               | 2 |
|    | 65       |                                                      |      | 0       | 91        | 04        | 76        |                         |   |
| BP | GO:00192 | regulation of lipid metabolic process                | 4/32 | 410/186 | 0.0050672 | 0.0194564 | 0.0089357 | AGT/FABP3/LYN/TNFRSF1A  | 4 |
|    | 16       |                                                      |      | 70      | 96        | 11        | 64        |                         |   |
| BP | GO:00506 | positive regulation of epithelial cell proliferation | 3/32 | 206/186 | 0.0051876 | 0.0197988 | 0.0090930 | GRN/STAT3/HMOX1         | 3 |
|    | 79       |                                                      |      | 70      | 85        | 35        | 29        |                         |   |
| BP | GO:00026 | regulation of immunoglobulin production              | 2/32 | 63/1867 | 0.0052075 | 0.0197988 | 0.0090930 | PTPRC/FCGR2B            | 2 |
|    | 37       |                                                      |      | 0       | 33        | 35        | 29        |                         |   |
| BP | GO:00075 | excretion                                            | 2/32 | 63/1867 | 0.0052075 | 0.0197988 | 0.0090930 | AGT/HMOX1               | 2 |
|    | 88       |                                                      |      | 0       | 33        | 35        | 29        |                         |   |
| BP | GO:00343 | protein localization to cell surface                 | 2/32 | 63/1867 | 0.0052075 | 0.0197988 | 0.0090930 | FCER1G/TYROBP           | 2 |
|    | 94       |                                                      |      | 0       | 33        | 35        | 29        |                         |   |
| BP | GO:00466 | response to cadmium ion                              | 2/32 | 63/1867 | 0.0052075 | 0.0197988 | 0.0090930 | CYBB/HMOX1              | 2 |
|    | 86       |                                                      |      | 0       | 33        | 35        | 29        |                         |   |
| BP | GO:00456 | regulation of osteoclast differentiation             | 2/32 | 64/1867 | 0.0053697 | 0.0203757 | 0.0093580 | TYROBP/TLR4             | 2 |
|    | 70       |                                                      |      | 0       | 92        | 87        | 06        |                         |   |
| BP | GO:00096 | response to mechanical stimulus                      | 3/32 | 210/186 | 0.0054719 | 0.0207228 | 0.0095174 | AGT/TLR4/TNFRSF1A       | 3 |
|    | 12       |                                                      |      | 70      | 47        | 62        | 08        |                         |   |
| BP | GO:00327 | positive regulation of interferon-gamma production   | 2/32 | 65/1867 | 0.0055343 | 0.0208751 | 0.0095873 | TLR4/CD14               | 2 |
|    | 29       |                                                      |      | 0       | 61        | 35        | 42        |                         |   |
| BP | GO:00726 | T cell migration                                     | 2/32 | 65/1867 | 0.0055343 | 0.0208751 | 0.0095873 | S1PR1/CCL2              | 2 |
|    | 78       |                                                      |      | 0       | 61        | 35        | 42        |                         |   |
| BP | GO:19035 | negative regulation of secretion by cell             | 3/32 | 211/186 | 0.0055444 | 0.0208751 | 0.0095873 | TNFRSF1A/FCGR2B/HMOX1   | 3 |
|    | 31       |                                                      |      | 70      | 53        | 35        | 42        |                         |   |
| BP | GO:00400 | regulation of multicellular organism growth          | 2/32 | 66/1867 | 0.0057012 | 0.0213823 | 0.0098203 | LGMN/STAT3              | 2 |
|    | 14       |                                                      |      | 0       | 32        | 78        | 04        |                         |   |
| BP | GO:00454 | regulation of nitric oxide biosynthetic process      | 2/32 | 66/1867 | 0.0057012 | 0.0213823 | 0.0098203 | AGT/TLR4                | 2 |
|    | 28       |                                                      |      | 0       | 32        | 78        | 04        |                         |   |
| BP | GO:00525 | regulation of endopeptidase activity                 | 4/32 | 425/186 | 0.0057495 | 0.0215218 | 0.0098843 | AGT/LGMN/LYN/STAT3      | 4 |
|    | 48       |                                                      |      | 70      | 23        | 63        | 66        |                         |   |

Supplementary Table2. The details for actual gene IDs and GO descriptions

|    |          |                                                                              |      |         |           |           |           |                      |   |
|----|----------|------------------------------------------------------------------------------|------|---------|-----------|-----------|-----------|----------------------|---|
| BP | GO:00703 | positive regulation of ERK1 and ERK2 cascade                                 | 3/32 | 215/186 | 0.0058402 | 0.0218194 | 0.0100210 | PTPRC/TLR4/CCL2      | 3 |
|    | 74       |                                                                              |      | 70      | 79        | 61        | 44        |                      |   |
| BP | GO:00603 | bone development                                                             | 3/32 | 217/186 | 0.0059916 | 0.0222992 | 0.0102413 | TYROBP/PTPRC/PTPN6   | 3 |
|    | 48       |                                                                              |      | 70      | 9         | 07        | 77        |                      |   |
| BP | GO:00712 | cellular response to inorganic substance                                     | 3/32 | 217/186 | 0.0059916 | 0.0222992 | 0.0102413 | LGMN/CYBB/HMOX1      | 3 |
|    | 41       |                                                                              |      | 70      | 9         | 07        | 77        |                      |   |
| BP | GO:00022 | T cell differentiation involved in immune response                           | 2/32 | 68/1867 | 0.0060418 | 0.0223145 | 0.0102484 | FCER1G/STAT3         | 2 |
|    | 92       |                                                                              |      | 0       | 49        | 61        | 29        |                      |   |
| BP | GO:00313 | positive regulation of cell killing                                          | 2/32 | 68/1867 | 0.0060418 | 0.0223145 | 0.0102484 | TYROBP/PTPRC         | 2 |
|    | 43       |                                                                              |      | 0       | 49        | 61        | 29        |                      |   |
| BP | GO:00336 | cell adhesion mediated by integrin                                           | 2/32 | 68/1867 | 0.0060418 | 0.0223145 | 0.0102484 | LYN/PTPN6            | 2 |
|    | 27       |                                                                              |      | 0       | 49        | 61        | 29        |                      |   |
| BP | GO:00458 | negative regulation of endocytosis                                           | 2/32 | 68/1867 | 0.0060418 | 0.0223145 | 0.0102484 | TLR2/FCGR2B          | 2 |
|    | 06       |                                                                              |      | 0       | 49        | 61        | 29        |                      |   |
| BP | GO:00506 | epithelial cell proliferation                                                | 4/32 | 434/186 | 0.0061871 | 0.0228077 | 0.0104749 | GRN/STAT3/HMOX1/CCL2 | 4 |
|    | 73       |                                                                              |      | 70      | 33        | 02        | 14        |                      |   |
| BP | GO:00027 | regulation of T cell mediated immunity                                       | 2/32 | 70/1867 | 0.0063915 | 0.0234721 | 0.0107800 | PTPRC/FCGR2B         | 2 |
|    | 09       |                                                                              |      | 0       | 78        | 03        | 54        |                      |   |
| BP | GO:00327 | negative regulation of tumor necrosis factor production                      | 2/32 | 70/1867 | 0.0063915 | 0.0234721 | 0.0107800 | TLR4/PTPN6           | 2 |
|    | 20       |                                                                              |      | 0       | 78        | 03        | 54        |                      |   |
| BP | GO:00192 | transmission of nerve impulse                                                | 2/32 | 72/1867 | 0.0067503 | 0.0246032 | 0.0112995 | AGT/S1PR1            | 2 |
|    | 26       |                                                                              |      | 0       | 59        | 82        | 72        |                      |   |
| BP | GO:00380 | signal transduction in absence of ligand                                     | 2/32 | 72/1867 | 0.0067503 | 0.0246032 | 0.0112995 | PF4/LCN2             | 2 |
|    | 34       |                                                                              |      | 0       | 59        | 82        | 72        |                      |   |
| BP | GO:00971 | extrinsic apoptotic signaling pathway in absence of ligand                   | 2/32 | 72/1867 | 0.0067503 | 0.0246032 | 0.0112995 | PF4/LCN2             | 2 |
|    | 92       |                                                                              |      | 0       | 59        | 82        | 72        |                      |   |
| BP | GO:19035 | negative regulation of tumor necrosis factor superfamily cytokine production | 2/32 | 72/1867 | 0.0067503 | 0.0246032 | 0.0112995 | TLR4/PTPN6           | 2 |
|    | 56       |                                                                              |      | 0       | 59        | 82        | 72        |                      |   |
| BP | GO:00069 | response to oxidative stress                                                 | 4/32 | 451/186 | 0.0070735 | 0.0257329 | 0.0118183 | TLR4/CYBB/HMOX1/LCN2 | 4 |
|    | 79       |                                                                              |      | 70      | 67        | 18        | 81        |                      |   |
| BP | GO:00140 | positive regulation of gliogenesis                                           | 2/32 | 74/1867 | 0.0071181 | 0.0257500 | 0.0118262 | LYN/TLR2             | 2 |
|    | 15       |                                                                              |      | 0       | 28        | 95        | 7         |                      |   |
| BP | GO:00316 | cellular response to nutrient                                                | 2/32 | 74/1867 | 0.0071181 | 0.0257500 | 0.0118262 | CYBB/HMOX1           | 2 |
|    | 70       |                                                                              |      | 0       | 28        | 95        | 7         |                      |   |
| BP | GO:19030 | positive regulation of response to wounding                                  | 2/32 | 74/1867 | 0.0071181 | 0.0257500 | 0.0118262 | GRN/TLR4             | 2 |
|    | 36       |                                                                              |      | 0       | 28        | 95        | 7         |                      |   |
| BP | GO:00973 | response to alcohol                                                          | 3/32 | 233/186 | 0.0072882 | 0.0263163 | 0.0120863 | STAT3/CYBB/CD14      | 3 |
|    | 05       |                                                                              |      | 70      | 22        | 18        | 19        |                      |   |

Supplementary Table2. The details for actual gene IDs and GO descriptions

|    |          |                                                                 |      |         |           |           |           |                           |   |
|----|----------|-----------------------------------------------------------------|------|---------|-----------|-----------|-----------|---------------------------|---|
| BP | GO:00106 | regulation of cardiac muscle hypertrophy                        | 2/32 | 75/1867 | 0.0073053 | 0.0263291 | 0.0120922 | AGT/TNFRSF1A              | 2 |
|    | 11       |                                                                 |      | 0       | 65        | 86        | 3         |                           |   |
| BP | GO:00016 | ameboidal-type cell migration                                   | 4/32 | 461/186 | 0.0076325 | 0.0273695 | 0.0125700 | AGT/LGMN/GRN/HMOX1        | 4 |
|    | 67       |                                                                 |      | 70      | 81        | 34        | 31        |                           |   |
| BP | GO:00316 | cellular response to nutrient levels                            | 3/32 | 237/186 | 0.0076363 | 0.0273695 | 0.0125700 | CYBB/HMOX1/LCN2           | 3 |
|    | 69       |                                                                 |      | 70      | 68        | 34        | 31        |                           |   |
| BP | GO:00431 | regulation of I-kappaB kinase/NF-kappaB signaling               | 3/32 | 237/186 | 0.0076363 | 0.0273695 | 0.0125700 | TLR4/TNFRSF1A/HMOX1       | 3 |
|    | 22       |                                                                 |      | 70      | 68        | 34        | 31        |                           |   |
| BP | GO:00068 | nitric oxide biosynthetic process                               | 2/32 | 77/1867 | 0.0076865 | 0.0274983 | 0.0126292 | AGT/TLR4                  | 2 |
|    | 09       |                                                                 |      | 0       | 02        | 89        | 1         |                           |   |
| BP | GO:00510 | negative regulation of secretion                                | 3/32 | 238/186 | 0.0077249 | 0.0275849 | 0.0126689 | TNFRSF1A/FCGR2B/HMOX1     | 3 |
|    | 48       |                                                                 |      | 70      | 25        | 52        | 66        |                           |   |
| BP | GO:00703 | regulation of stress-activated protein kinase signaling cascade | 3/32 | 239/186 | 0.0078140 | 0.0278520 | 0.0127916 | LYN/TLR4/FCGR2B           | 3 |
|    | 02       |                                                                 |      | 70      | 91        | 63        | 43        |                           |   |
| BP | GO:00030 | muscle system process                                           | 4/32 | 465/186 | 0.0078641 | 0.0278833 | 0.0128060 | AGT/VIM/TNFRSF1A/HMOX1    | 4 |
|    | 12       |                                                                 |      | 70      | 61        | 41        | 08        |                           |   |
| BP | GO:00083 | associative learning                                            | 2/32 | 78/1867 | 0.0078803 | 0.0278833 | 0.0128060 | AGT/LGMN                  | 2 |
|    | 06       |                                                                 |      | 0       | 87        | 41        | 08        |                           |   |
| BP | GO:00147 | regulation of muscle hypertrophy                                | 2/32 | 78/1867 | 0.0078803 | 0.0278833 | 0.0128060 | AGT/TNFRSF1A              | 2 |
|    | 43       |                                                                 |      | 0       | 87        | 41        | 08        |                           |   |
| BP | GO:00434 | negative regulation of MAP kinase activity                      | 2/32 | 78/1867 | 0.0078803 | 0.0278833 | 0.0128060 | LYN/PTPN6                 | 2 |
|    | 07       |                                                                 |      | 0       | 87        | 41        | 08        |                           |   |
| BP | GO:00302 | T cell differentiation                                          | 3/32 | 240/186 | 0.0079038 | 0.0279154 | 0.0128207 | FCER1G/PTPRC/STAT3        | 3 |
|    | 17       |                                                                 |      | 70      | 68        | 84        | 7         |                           |   |
| BP | GO:00550 | iron ion homeostasis                                            | 2/32 | 79/1867 | 0.0080764 | 0.0284732 | 0.0130769 | HMOX1/LCN2                | 2 |
|    | 72       |                                                                 |      | 0       | 74        | 41        | 32        |                           |   |
| BP | GO:00092 | response to temperature stimulus                                | 3/32 | 243/186 | 0.0081768 | 0.0287748 | 0.0132154 | LYN/HMOX1/CD14            | 3 |
|    | 66       |                                                                 |      | 70      | 76        | 86        | 69        |                           |   |
| BP | GO:00970 | dendritic spine organization                                    | 2/32 | 80/1867 | 0.0082747 | 0.0290140 | 0.0133252 | LGMN/FCGR2B               | 2 |
|    | 61       |                                                                 |      | 0       | 54        | 09        | 91        |                           |   |
| BP | GO:01400 | exocytic process                                                | 2/32 | 80/1867 | 0.0082747 | 0.0290140 | 0.0133252 | FCER1G/LYN                | 2 |
|    | 29       |                                                                 |      | 0       | 54        | 09        | 91        |                           |   |
| BP | GO:00341 | homotypic cell-cell adhesion                                    | 2/32 | 81/1867 | 0.0084752 | 0.0296632 | 0.0136234 | LYN/PTPN6                 | 2 |
|    | 09       |                                                                 |      | 0       | 19        | 68        | 76        |                           |   |
| BP | GO:00972 | cellular response to toxic substance                            | 3/32 | 247/186 | 0.0085494 | 0.0298693 | 0.0137181 | CYBB/HMOX1/LCN2           | 3 |
|    | 37       |                                                                 |      | 70      | 99        | 32        | 16        |                           |   |
| BP | GO:00512 | regulation of release of sequestered calcium ion into cytosol   | 2/32 | 82/1867 | 0.0086778 | 0.0302632 | 0.0138990 | LYN/PTPN6                 | 2 |
|    | 79       |                                                                 |      | 0       | 63        | 68        | 39        |                           |   |
| BP | GO:00430 | regulation of GTPase activity                                   | 4/32 | 479/186 | 0.0087112 | 0.0303252 | 0.0139275 | S1PR1/PLXNB2/S100A10/CCL2 | 4 |
|    | 87       |                                                                 |      | 70      | 86        | 86        | 22        |                           |   |
| BP | GO:00481 | regulation of fibroblast                                        | 2/32 | 83/1867 | 0.0088826 | 0.0308112 | 0.0141507 | AGT/S100A6                | 2 |

Supplementary Table2. The details for actual gene IDs and GO descriptions

|    |          |                                                                  |      |         |           |           |           |                         |   |
|----|----------|------------------------------------------------------------------|------|---------|-----------|-----------|-----------|-------------------------|---|
|    | 45       | proliferation                                                    |      | 0       | 78        | 93        | 31        |                         |   |
| BP | GO:20001 | regulation of leukocyte                                          | 2/32 | 83/1867 | 0.0088826 | 0.0308112 | 0.0141507 | FCER1G/LYN              | 2 |
|    | 06       | apoptotic process                                                |      | 0       | 78        | 93        | 31        |                         |   |
| BP | GO:00105 | negative regulation of                                           | 2/32 | 84/1867 | 0.0090896 | 0.0312579 | 0.0143558 | STAT3/HMOX1             | 2 |
|    | 07       | autophagy                                                        |      | 0       | 56        | 49        | 67        |                         |   |
| BP | GO:00468 | positive regulation of lipid biosynthetic                        | 2/32 | 84/1867 | 0.0090896 | 0.0312579 | 0.0143558 | FABP3/TNFRSF1A          | 2 |
|    | 89       | process                                                          |      | 0       | 56        | 49        | 67        |                         |   |
| BP | GO:00481 | fibroblast proliferation                                         | 2/32 | 84/1867 | 0.0090896 | 0.0312579 | 0.0143558 | AGT/S100A6              | 2 |
|    | 44       |                                                                  |      | 0       | 56        | 49        | 67        |                         |   |
| BP | GO:00514 | regulation of stress fiber                                       | 2/32 | 84/1867 | 0.0090896 | 0.0312579 | 0.0143558 | S1PR1/S100A10           | 2 |
|    | 92       | assembly                                                         |      | 0       | 56        | 49        | 67        |                         |   |
| BP | GO:00488 | multicellular organismal                                         | 4/32 | 485/186 | 0.0090920 | 0.0312579 | 0.0143558 | S1PR1/STAT3/TLR4/LCN2   | 4 |
|    | 71       | homeostasis                                                      |      | 70      | 49        | 49        | 67        |                         |   |
| BP | GO:19047 | regulation of vascular smooth muscle cell                        | 2/32 | 85/1867 | 0.0092987 | 0.0318557 | 0.0146304 | AGT/HMOX1               | 2 |
|    | 05       | proliferation                                                    |      | 0       | 9         | 47        | 18        |                         |   |
| BP | GO:19908 | vascular smooth muscle                                           | 2/32 | 85/1867 | 0.0092987 | 0.0318557 | 0.0146304 | AGT/HMOX1               | 2 |
|    | 74       | cell proliferation                                               |      | 0       | 9         | 47        | 18        |                         |   |
| BP | GO:00076 | learning or memory                                               | 3/32 | 256/186 | 0.0094241 | 0.0322283 | 0.0148015 | AGT/LGMN/TLR2           | 3 |
|    | 11       |                                                                  |      | 70      | 84        | 83        | 59        |                         |   |
| BP | GO:00017 | leukocyte homeostasis                                            | 2/32 | 86/1867 | 0.0095100 | 0.0322378 | 0.0148058 | FCER1G/LYN              | 2 |
|    | 76       |                                                                  |      | 0       | 71        | 11        | 89        |                         |   |
| BP | GO:00086 | extrinsic apoptotic signaling pathway via death domain receptors | 2/32 | 86/1867 | 0.0095100 | 0.0322378 | 0.0148058 | TNFRSF1A/HMOX1          | 2 |
|    | 25       |                                                                  |      | 0       | 71        | 11        | 89        |                         |   |
| BP | GO:00301 | natural killer cell                                              | 2/32 | 86/1867 | 0.0095100 | 0.0322378 | 0.0148058 | TYROBP/PTPRC            | 2 |
|    | 01       | activation                                                       |      | 0       | 71        | 11        | 89        |                         |   |
| BP | GO:00602 | long-term synaptic                                               | 2/32 | 86/1867 | 0.0095100 | 0.0322378 | 0.0148058 | LGMN/TYROBP             | 2 |
|    | 91       | potentiation                                                     |      | 0       | 71        | 11        | 89        |                         |   |
| BP | GO:00705 | response to fatty acid                                           | 2/32 | 86/1867 | 0.0095100 | 0.0322378 | 0.0148058 | FABP3/TLR2              | 2 |
|    | 42       |                                                                  |      | 0       | 71        | 11        | 89        |                         |   |
| BP | GO:00026 | positive regulation of leukocyte chemotaxis                      | 2/32 | 87/1867 | 0.0097234 | 0.0329037 | 0.0151117 | LGMN/C3AR1              | 2 |
|    | 90       |                                                                  |      | 0       | 93        | 58        | 39        |                         |   |
| BP | GO:00726 | protein localization to plasma membrane                          | 3/32 | 260/186 | 0.0098291 | 0.0331130 | 0.0152078 | FCER1G/TNFRSF1A/S100A10 | 3 |
|    | 59       |                                                                  |      | 70      | 89        | 84        | 77        |                         |   |
| BP | GO:01100 | regulation of actin filament organization                        | 3/32 | 261/186 | 0.0099320 | 0.0331130 | 0.0152078 | S1PR1/GMFG/S100A10      | 3 |
|    | 53       |                                                                  |      | 70      | 13        | 84        | 77        |                         |   |
| BP | GO:00341 | regulation of tissue remodeling                                  | 2/32 | 88/1867 | 0.0099390 | 0.0331130 | 0.0152078 | AGT/S1PR1               | 2 |
|    | 03       |                                                                  |      | 0       | 48        | 84        | 77        |                         |   |
| BP | GO:00610 | regulation of protein tyrosine kinase activity                   | 2/32 | 88/1867 | 0.0099390 | 0.0331130 | 0.0152078 | AGT/PTPRC               | 2 |
|    | 97       |                                                                  |      | 0       | 48        | 84        | 77        |                         |   |
| BP | GO:00700 | chemokine-mediated signaling pathway                             | 2/32 | 88/1867 | 0.0099390 | 0.0331130 | 0.0152078 | PF4/CCL2                | 2 |
|    | 98       |                                                                  |      | 0       | 48        | 84        | 77        |                         |   |

Supplementary Table2. The details for actual gene IDs and GO descriptions

|    |          |                                                                |      |         |           |           |           |                |   |
|----|----------|----------------------------------------------------------------|------|---------|-----------|-----------|-----------|----------------|---|
| BP | GO:01060 | neuron projection                                              | 2/32 | 88/1867 | 0.0099390 | 0.0331130 | 0.0152078 | LGMN/FCGR2B    | 2 |
|    | 27       | organization                                                   |      | 0       | 48        | 84        | 77        |                |   |
| BP | GO:19018 | regulation of cell                                             | 2/32 | 88/1867 | 0.0099390 | 0.0331130 | 0.0152078 | AGT/S100A10    | 2 |
|    | 88       | junction assembly                                              |      | 0       | 48        | 84        | 77        |                |   |
| BP | GO:19037 | regulation of<br>phospholipid metabolic<br>process             | 2/32 | 88/1867 | 0.0099390 | 0.0331130 | 0.0152078 | FABP3/LYN      | 2 |
|    | 25       |                                                                |      | 0       | 48        | 84        | 77        |                |   |
| BP | GO:19040 | regulation of epithelial<br>cell apoptotic process             | 2/32 | 88/1867 | 0.0099390 | 0.0331130 | 0.0152078 | HMOX1/CCL2     | 2 |
|    | 35       |                                                                |      | 0       | 48        | 84        | 77        |                |   |
| BP | GO:00158 | monoamine transport                                            | 2/32 | 90/1867 | 0.0103765 | 0.0344522 | 0.0158228 | AGT/FCER1G     | 2 |
|    | 44       |                                                                |      | 0       | 28        | 06        | 97        |                |   |
| BP | GO:00326 | regulation of<br>interleukin-1 beta<br>production              | 2/32 | 90/1867 | 0.0103765 | 0.0344522 | 0.0158228 | TYROBP/TLR4    | 2 |
|    | 51       |                                                                |      | 0       | 28        | 06        | 97        |                |   |
| BP | GO:00507 | positive regulation of<br>protein secretion                    | 3/32 | 268/186 | 0.0106694 | 0.0353643 | 0.0162418 | TLR4/TLR2/CD14 | 3 |
|    | 14       |                                                                |      | 70      | 87        | 34        | 1         |                |   |
| BP | GO:19011 | regulation of ERBB<br>signaling pathway                        | 2/32 | 93/1867 | 0.0110485 | 0.0365582 | 0.0167901 | AGT/LGMN       | 2 |
|    | 84       |                                                                |      | 0       | 61        | 92        | 6         |                |   |
| BP | GO:00432 | positive regulation of ion<br>transport                        | 3/32 | 275/186 | 0.0114381 | 0.0377828 | 0.0173525 | AGT/FABP3/CCL2 | 3 |
|    | 70       |                                                                |      | 70      | 3         | 52        | 65        |                |   |
| BP | GO:00440 | regulation of anion<br>transport                               | 2/32 | 95/1867 | 0.0115070 | 0.0378814 | 0.0173978 | AGT/FABP3      | 2 |
|    | 70       |                                                                |      | 0       | 37        | 01        | 26        |                |   |
| BP | GO:01100 | regulation of actomyosin<br>structure organization             | 2/32 | 95/1867 | 0.0115070 | 0.0378814 | 0.0173978 | S1PR1/S100A10  | 2 |
|    | 20       |                                                                |      | 0       | 37        | 01        | 26        |                |   |
| BP | GO:00106 | regulation of muscle cell<br>apoptotic process                 | 2/32 | 96/1867 | 0.0117393 | 0.0385155 | 0.0176890 | AGT/HMOX1      | 2 |
|    | 60       |                                                                |      | 0       | 9         | 29        | 63        |                |   |
| BP | GO:00302 | megakaryocyte<br>differentiation                               | 2/32 | 96/1867 | 0.0117393 | 0.0385155 | 0.0176890 | PTPN6/PF4      | 2 |
|    | 19       |                                                                |      | 0       | 9         | 29        | 63        |                |   |
| BP | GO:00322 | regulation of actin<br>filament bundle<br>assembly             | 2/32 | 97/1867 | 0.0119738 | 0.0390205 | 0.0179209 | S1PR1/S100A10  | 2 |
|    | 31       |                                                                |      | 0       | 1         | 33        | 96        |                |   |
| BP | GO:00487 | oligodendrocyte<br>differentiation                             | 2/32 | 97/1867 | 0.0119738 | 0.0390205 | 0.0179209 | LYN/TLR2       | 2 |
|    | 09       |                                                                |      | 0       | 1         | 33        | 96        |                |   |
| BP | GO:19908 | response to chemokine                                          | 2/32 | 97/1867 | 0.0119738 | 0.0390205 | 0.0179209 | PF4/CCL2       | 2 |
|    | 68       |                                                                |      | 0       | 1         | 33        | 96        |                |   |
| BP | GO:19908 | cellular response to<br>chemokine                              | 2/32 | 97/1867 | 0.0119738 | 0.0390205 | 0.0179209 | PF4/CCL2       | 2 |
|    | 69       |                                                                |      | 0       | 1         | 33        | 96        |                |   |
| BP | GO:00300 | contractile actin filament<br>bundle assembly                  | 2/32 | 98/1867 | 0.0122102 | 0.0396578 | 0.0182137 | S1PR1/S100A10  | 2 |
|    | 38       |                                                                |      | 0       | 89        | 72        | 07        |                |   |
| BP | GO:00431 | stress fiber assembly                                          | 2/32 | 98/1867 | 0.0122102 | 0.0396578 | 0.0182137 | S1PR1/S100A10  | 2 |
|    | 49       |                                                                |      | 0       | 89        | 72        | 07        |                |   |
| BP | GO:00028 | positive regulation of<br>adaptive immune<br>response based on | 2/32 | 100/186 | 0.0126893 | 0.0410730 | 0.0188636 | FCER1G/PTPRC   | 2 |
|    | 24       |                                                                |      | 70      | 95        | 15        | 41        |                |   |



Supplementary Table2. The details for actual gene IDs and GO descriptions

|    |          |                                                       |      |         |           |           |           |                         |   |
|----|----------|-------------------------------------------------------|------|---------|-----------|-----------|-----------|-------------------------|---|
| BP | GO:00028 | positive regulation of adaptive immune response       | 2/32 | 105/186 | 0.0139226 | 0.0437165 | 0.0200777 | FCER1G/PTPRC            | 2 |
|    | 21       |                                                       |      | 70      | 9         | 59        | 44        |                         |   |
| BP | GO:00550 | cardiac muscle tissue growth                          | 2/32 | 105/186 | 0.0139226 | 0.0437165 | 0.0200777 | AGT/S1PR1               | 2 |
|    | 17       |                                                       |      | 70      | 9         | 59        | 44        |                         |   |
| BP | GO:00508 | cognition                                             | 3/32 | 296/186 | 0.0139333 | 0.0437165 | 0.0200777 | AGT/LGMN/TLR2           | 3 |
|    | 90       |                                                       |      | 70      | 85        | 59        | 44        |                         |   |
| BP | GO:00024 | T cell mediated immunity                              | 2/32 | 106/186 | 0.0141753 | 0.0442609 | 0.0203277 | PTPRC/FCGR2B            | 2 |
|    | 56       |                                                       |      | 70      | 82        | 76        | 79        |                         |   |
| BP | GO:00033 | cardiac muscle hypertrophy                            | 2/32 | 106/186 | 0.0141753 | 0.0442609 | 0.0203277 | AGT/TNFRSF1A            | 2 |
|    | 00       |                                                       |      | 70      | 82        | 76        | 79        |                         |   |
| BP | GO:00421 | neurotransmitter biosynthetic process                 | 2/32 | 106/186 | 0.0141753 | 0.0442609 | 0.0203277 | AGT/TLR4                | 2 |
|    | 36       |                                                       |      | 70      | 82        | 76        | 79        |                         |   |
| BP | GO:00435 | regulation of muscle adaptation                       | 2/32 | 107/186 | 0.0144300 | 0.0449837 | 0.0206597 | AGT/TNFRSF1A            | 2 |
|    | 02       |                                                       |      | 70      | 69        | 67        | 36        |                         |   |
| BP | GO:00156 | ammonium transport                                    | 2/32 | 108/186 | 0.0146867 | 0.0455641 | 0.0209262 | FCER1G/LYN              | 2 |
|    | 96       |                                                       |      | 70      | 43        | 5         | 89        |                         |   |
| BP | GO:00300 | cellular monovalent inorganic cation homeostasis      | 2/32 | 108/186 | 0.0146867 | 0.0455641 | 0.0209262 | AGT/GRN                 | 2 |
|    | 04       |                                                       |      | 70      | 43        | 5         | 89        |                         |   |
| BP | GO:00469 | cellular transition metal ion homeostasis             | 2/32 | 108/186 | 0.0146867 | 0.0455641 | 0.0209262 | HMOX1/LCN2              | 2 |
|    | 16       |                                                       |      | 70      | 43        | 5         | 89        |                         |   |
| BP | GO:00148 | striated muscle hypertrophy                           | 2/32 | 109/186 | 0.0149453 | 0.0462925 | 0.0212608 | AGT/TNFRSF1A            | 2 |
|    | 97       |                                                       |      | 70      | 96        | 3         | 13        |                         |   |
| BP | GO:00148 | muscle hypertrophy                                    | 2/32 | 111/186 | 0.0154686 | 0.0476846 | 0.0219001 | AGT/TNFRSF1A            | 2 |
|    | 96       |                                                       |      | 70      | 16        | 53        | 75        |                         |   |
| BP | GO:00726 | lymphocyte migration                                  | 2/32 | 111/186 | 0.0154686 | 0.0476846 | 0.0219001 | S1PR1/CCL2              | 2 |
|    | 76       |                                                       |      | 70      | 16        | 53        | 75        |                         |   |
| BP | GO:19040 | epithelial cell apoptotic process                     | 2/32 | 111/186 | 0.0154686 | 0.0476846 | 0.0219001 | HMOX1/CCL2              | 2 |
|    | 19       |                                                       |      | 70      | 16        | 53        | 75        |                         |   |
| BP | GO:00019 | positive regulation of endothelial cell proliferation | 2/32 | 112/186 | 0.0157331 | 0.0482699 | 0.0221689 | STAT3/HMOX1             | 2 |
|    | 38       |                                                       |      | 70      | 68        | 57        | 87        |                         |   |
| BP | GO:00508 | negative regulation of T cell activation              | 2/32 | 112/186 | 0.0157331 | 0.0482699 | 0.0221689 | PTPN6/FCGR2B            | 2 |
|    | 68       |                                                       |      | 70      | 68        | 57        | 87        |                         |   |
| BP | GO:00604 | heart growth                                          | 2/32 | 112/186 | 0.0157331 | 0.0482699 | 0.0221689 | AGT/S1PR1               | 2 |
|    | 19       |                                                       |      | 70      | 68        | 57        | 87        |                         |   |
| BP | GO:19907 | protein localization to cell periphery                | 3/32 | 311/186 | 0.0158917 | 0.0486795 | 0.0223571 | FCER1G/TNFRSF1A/S100A10 | 3 |
|    | 78       |                                                       |      | 70      | 82        | 67        | 1         |                         |   |
| BP | GO:00022 | stimulatory C-type lectin receptor signaling pathway  | 2/32 | 113/186 | 0.0159996 | 0.0487788 | 0.0224027 | FCER1G/LYN              | 2 |
|    | 23       |                                                       |      | 70      | 71        | 72        | 18        |                         |   |
| BP | GO:00326 | interferon-gamma production                           | 2/32 | 113/186 | 0.0159996 | 0.0487788 | 0.0224027 | TLR4/CD14               | 2 |
|    | 09       |                                                       |      | 70      | 71        | 72        | 18        |                         |   |

Supplementary Table2. The details for actual gene IDs and GO descriptions

|    |          |                                                            |      |         |           |           |           |                    |   |
|----|----------|------------------------------------------------------------|------|---------|-----------|-----------|-----------|--------------------|---|
| BP | GO:00432 | response to amino acid                                     | 2/32 | 113/186 | 0.0159996 | 0.0487788 | 0.0224027 | LYN/CYBB           | 2 |
|    | 00       |                                                            |      | 70      | 71        | 72        | 18        |                    |   |
| BP | GO:00066 | icosanoid metabolic                                        | 2/32 | 114/186 | 0.0162681 | 0.0493076 | 0.0226455 | TLR2/TNFRSF1A      | 2 |
|    | 90       | process                                                    |      | 70      | 2         | 12        | 52        |                    |   |
| BP | GO:00302 | erythrocyte                                                | 2/32 | 114/186 | 0.0162681 | 0.0493076 | 0.0226455 | LYN/STAT3          | 2 |
|    | 18       | differentiation                                            |      | 70      | 2         | 12        | 52        |                    |   |
| BP | GO:00454 | endothelial cell                                           | 2/32 | 114/186 | 0.0162681 | 0.0493076 | 0.0226455 | S1PR1/TNFRSF1A     | 2 |
|    | 46       | differentiation                                            |      | 70      | 2         | 12        | 52        |                    |   |
| BP | GO:00519 | negative regulation of<br>nervous system<br>development    | 3/32 | 315/186 | 0.0164390 | 0.0493076 | 0.0226455 | VIM/STAT3/TLR2     | 3 |
|    | 61       |                                                            |      | 70      | 43        | 12        | 52        |                    |   |
| BP | GO:00705 | calcium ion                                                | 3/32 | 315/186 | 0.0164390 | 0.0493076 | 0.0226455 | LYN/PTPRC/PTPN6    | 3 |
|    | 88       | transmembrane transport                                    |      | 70      | 43        | 12        | 52        |                    |   |
| BP | GO:00326 | interleukin-1 production                                   | 2/32 | 115/186 | 0.0165385 | 0.0493076 | 0.0226455 | TYROBP/TLR4        | 2 |
|    | 12       |                                                            |      | 70      | 06        | 12        | 52        |                    |   |
| BP | GO:00329 | collagen metabolic                                         | 2/32 | 115/186 | 0.0165385 | 0.0493076 | 0.0226455 | CTSB/VIM           | 2 |
|    | 63       | process                                                    |      | 70      | 06        | 12        | 52        |                    |   |
| BP | GO:00068 | receptor-mediated                                          | 3/32 | 316/186 | 0.0165775 | 0.0493076 | 0.0226455 | FCER1G/FCGR2B/CD14 | 3 |
|    | 98       | endocytosis                                                |      | 70      | 1         | 12        | 52        |                    |   |
|    |          | innate immune response                                     |      |         |           |           |           |                    |   |
| BP | GO:00022 | activating cell surface                                    | 2/32 | 116/186 | 0.0168108 | 0.0493076 | 0.0226455 | FCER1G/LYN         | 2 |
|    | 20       | receptor signaling<br>pathway                              |      | 70      | 23        | 12        | 52        |                    |   |
| BP | GO:00018 | serotonin secretion                                        | 1/32 | 10/1867 | 0.0170122 | 0.0493076 | 0.0226455 | FCER1G             | 1 |
|    | 20       |                                                            |      | 0       | 7         | 12        | 52        |                    |   |
| BP | GO:00033 | sphingosine-1-phosphate<br>receptor signaling<br>pathway   | 1/32 | 10/1867 | 0.0170122 | 0.0493076 | 0.0226455 | S1PR1              | 1 |
|    | 76       |                                                            |      | 0       | 7         | 12        | 52        |                    |   |
| BP | GO:00158 | arginine transport                                         | 1/32 | 10/1867 | 0.0170122 | 0.0493076 | 0.0226455 | AGT                | 1 |
|    | 09       |                                                            |      | 0       | 7         | 12        | 52        |                    |   |
| BP | GO:00326 | interleukin-18                                             | 1/32 | 10/1867 | 0.0170122 | 0.0493076 | 0.0226455 | TLR2               | 1 |
|    | 21       | production                                                 |      | 0       | 7         | 12        | 52        |                    |   |
| BP | GO:00332 | leptin-mediated                                            | 1/32 | 10/1867 | 0.0170122 | 0.0493076 | 0.0226455 | STAT3              | 1 |
|    | 10       | signaling pathway                                          |      | 0       | 7         | 12        | 52        |                    |   |
| BP | GO:00341 | regulation of toll-like<br>receptor 2 signaling<br>pathway | 1/32 | 10/1867 | 0.0170122 | 0.0493076 | 0.0226455 | LYN                | 1 |
|    | 35       |                                                            |      | 0       | 7         | 12        | 52        |                    |   |
| BP | GO:00343 | regulation of glial cell<br>apoptotic process              | 1/32 | 10/1867 | 0.0170122 | 0.0493076 | 0.0226455 | CCL2               | 1 |
|    | 50       |                                                            |      | 0       | 7         | 12        | 52        |                    |   |
| BP | GO:00427 | drinking behavior                                          | 1/32 | 10/1867 | 0.0170122 | 0.0493076 | 0.0226455 | AGT                | 1 |
|    | 56       |                                                            |      | 0       | 7         | 12        | 52        |                    |   |
| BP | GO:00445 | long-chain fatty acid                                      | 1/32 | 10/1867 | 0.0170122 | 0.0493076 | 0.0226455 | FABP3              | 1 |
|    | 39       | import                                                     |      | 0       | 7         | 12        | 52        |                    |   |
| BP | GO:00453 | positive regulation of                                     | 1/32 | 10/1867 | 0.0170122 | 0.0493076 | 0.0226455 | TLR4               | 1 |



Supplementary Table2. The details for actual gene IDs and GO descriptions

|    |            |                                                                         |      |           |           |           |           |                                                       |   |
|----|------------|-------------------------------------------------------------------------|------|-----------|-----------|-----------|-----------|-------------------------------------------------------|---|
|    | 48         | MHC class II biosynthetic process                                       | 0    | 7         | 12        | 52        |           |                                                       |   |
| BP | GO:0048304 | positive regulation of isotype switching to IgG isotypes                | 1/32 | 10/1867   | 0.0170122 | 0.0493076 | 0.0226455 | PTPRC                                                 | 1 |
| BP | GO:0051014 | actin filament severing                                                 | 1/32 | 10/1867   | 0.0170122 | 0.0493076 | 0.0226455 | GMFG                                                  | 1 |
| BP | GO:0071104 | response to interleukin-9                                               | 1/32 | 10/1867   | 0.0170122 | 0.0493076 | 0.0226455 | STAT3                                                 | 1 |
| BP | GO:0071281 | cellular response to iron ion                                           | 1/32 | 10/1867   | 0.0170122 | 0.0493076 | 0.0226455 | HMOX1                                                 | 1 |
| BP | GO:0090154 | positive regulation of sphingolipid biosynthetic process                | 1/32 | 10/1867   | 0.0170122 | 0.0493076 | 0.0226455 | TNFRSF1A                                              | 1 |
| BP | GO:0097048 | dendritic cell apoptotic process                                        | 1/32 | 10/1867   | 0.0170122 | 0.0493076 | 0.0226455 | LYN                                                   | 1 |
| BP | GO:0140052 | cellular response to oxidised low-density lipoprotein particle stimulus | 1/32 | 10/1867   | 0.0170122 | 0.0493076 | 0.0226455 | TLR4                                                  | 1 |
| BP | GO:1900426 | positive regulation of defense response to bacterium                    | 1/32 | 10/1867   | 0.0170122 | 0.0493076 | 0.0226455 | GRN                                                   | 1 |
| BP | GO:1903332 | regulation of protein folding                                           | 1/32 | 10/1867   | 0.0170122 | 0.0493076 | 0.0226455 | GRN                                                   | 1 |
| BP | GO:1903789 | regulation of amino acid transmembrane transport                        | 1/32 | 10/1867   | 0.0170122 | 0.0493076 | 0.0226455 | AGT                                                   | 1 |
| BP | GO:1990822 | basic amino acid transmembrane transport                                | 1/32 | 10/1867   | 0.0170122 | 0.0493076 | 0.0226455 | AGT                                                   | 1 |
| BP | GO:2000304 | positive regulation of ceramide biosynthetic process                    | 1/32 | 10/1867   | 0.0170122 | 0.0493076 | 0.0226455 | TNFRSF1A                                              | 1 |
| BP | GO:2000425 | regulation of apoptotic cell clearance                                  | 1/32 | 10/1867   | 0.0170122 | 0.0493076 | 0.0226455 | CCL2                                                  | 1 |
| BP | GO:2000668 | regulation of dendritic cell apoptotic process                          | 1/32 | 10/1867   | 0.0170122 | 0.0493076 | 0.0226455 | LYN                                                   | 1 |
| CC | GO:0045121 | membrane raft                                                           | 9/32 | 315/19717 | 1.23E-09  | 6.72E-08  | 3.81E-08  | S1PR1/LYN/PTPRC/TLR2/TNFRSF1A/LCP2/S100A10/HMOX1/CD14 | 9 |
| CC | GO:0098857 | membrane microdomain                                                    | 9/32 | 316/19717 | 1.26E-09  | 6.72E-08  | 3.81E-08  | S1PR1/LYN/PTPRC/TLR2/TNFRSF1A/LCP2/S100A10/HMOX1/CD14 | 9 |
| CC | GO:0098589 | membrane region                                                         | 9/32 | 328/19717 | 1.75E-09  | 6.72E-08  | 3.81E-08  | S1PR1/LYN/PTPRC/TLR2/TNFRSF1A/LCP2/S100A10/HMOX1/CD14 | 9 |
| CC | GO:0030667 | secretory granule membrane                                              | 7/32 | 298/19717 | 4.09E-07  | 1.18E-05  | 6.67E-06  | FCER1G/TYROBP/PTPRC/TLR2/CYBB/C3AR1/CD14              | 7 |

Supplementary Table2. The details for actual gene IDs and GO descriptions

|    |          |                                                            |      |               |           |           |           |                                            |   |
|----|----------|------------------------------------------------------------|------|---------------|-----------|-----------|-----------|--------------------------------------------|---|
| CC | GO:00098 | external side of plasma membrane                           | 7/32 | 393/197<br>17 | 2.59E-06  | 5.97E-05  | 3.39E-05  | S1PR1/FCER1G/PTPRC/TLR4/FCGR2B/FCGR3A/CD14 | 7 |
| CC | GO:00347 | secretory granule lumen                                    | 6/32 | 321/197<br>17 | 1.13E-05  | 0.0002159 | 0.0001225 | GRN/GMFG/PTPN6/PF4/S100A11/LCN2            | 6 |
| CC | GO:00602 | cytoplasmic vesicle lumen                                  | 6/32 | 338/197<br>17 | 1.51E-05  | 0.0002207 | 0.0001252 | GRN/GMFG/PTPN6/PF4/S100A11/LCN2            | 6 |
| CC | GO:00319 | vesicle lumen                                              | 6/32 | 339/197<br>17 | 1.54E-05  | 0.0002207 | 0.0001252 | GRN/GMFG/PTPN6/PF4/S100A11/LCN2            | 6 |
| CC | GO:00425 | specific granule                                           | 4/32 | 160/197<br>17 | 0.0001257 | 0.0016074 | 0.0009122 | PTPN6/CYBB/C3AR1/LCN2                      | 4 |
| CC | GO:00057 | vacuolar lumen                                             | 4/32 | 172/197<br>17 | 0.0001661 | 0.0019108 | 0.0010844 | LGMN/GRN/CTSB/IFI30                        | 4 |
| CC | GO:00620 | collagen-containing extracellular matrix                   | 5/32 | 406/197<br>17 | 0.0004598 | 0.0042961 | 0.0024380 | AGT/CTSB/S100A6/PF4/S100A10                | 5 |
| CC | GO:00360 | endolysosome                                               | 2/32 | 20/197<br>7   | 0.0004760 | 0.0042961 | 0.0024380 | LGMN/CTSB                                  | 2 |
| CC | GO:00432 | lysosomal lumen                                            | 3/32 | 95/197<br>7   | 0.0004856 | 0.0042961 | 0.0024380 | LGMN/CTSB/IFI30                            | 3 |
| CC | GO:00453 | phagocytic vesicle                                         | 3/32 | 132/197<br>17 | 0.0012621 | 0.0103675 | 0.0058836 | VIM/TLR2/CYBB                              | 3 |
| CC | GO:00319 | endosome lumen                                             | 2/32 | 34/197<br>7   | 0.0013858 | 0.0106251 | 0.0060298 | LGMN/CTSB                                  | 2 |
| CC | GO:00098 | cytoplasmic side of plasma membrane                        | 3/32 | 154/197<br>17 | 0.0019628 | 0.0141076 | 0.0080061 | LYN/PTPRC/S100A6                           | 3 |
| CC | GO:00708 | tertiary granule                                           | 3/32 | 164/197<br>17 | 0.0023474 | 0.0152587 | 0.0086594 | FCER1G/PTPN6/CYBB                          | 3 |
| CC | GO:00198 | extrinsic component of plasma membrane                     | 3/32 | 165/197<br>17 | 0.0023883 | 0.0152587 | 0.0086594 | LYN/S100A6/S100A10                         | 3 |
| CC | GO:00985 | cytoplasmic side of membrane                               | 3/32 | 178/197<br>17 | 0.0029599 | 0.0179156 | 0.0101672 | LYN/PTPRC/S100A6                           | 3 |
| CC | GO:01010 | ficolin-1-rich granule                                     | 3/32 | 185/197<br>17 | 0.0032998 | 0.0189738 | 0.0107677 | FCER1G/CTSB/GMFG                           | 3 |
| CC | GO:00355 | specific granule lumen                                     | 2/32 | 62/197<br>7   | 0.0045411 | 0.0248682 | 0.0141128 | PTPN6/LCN2                                 | 2 |
| CC | GO:00059 | cell-cell junction                                         | 4/32 | 459/197<br>17 | 0.0062214 | 0.0312068 | 0.0177100 | LYN/LCP2/PTPN6/S100A11                     | 4 |
| CC | GO:00708 | tertiary granule membrane                                  | 2/32 | 73/197<br>7   | 0.0062413 | 0.0312068 | 0.0177100 | FCER1G/CYBB                                | 2 |
| CC | GO:00306 | phagocytic vesicle membrane                                | 2/32 | 76/197<br>7   | 0.0067481 | 0.0323349 | 0.0183502 | TLR2/CYBB                                  | 2 |
| CC | GO:00312 | extrinsic component of cytoplasmic side of plasma membrane | 2/32 | 91/197<br>7   | 0.0095506 | 0.0422430 | 0.0239731 | LYN/S100A6                                 | 2 |
| CC | GO:00355 | specific granule                                           | 2/32 | 91/197<br>7   | 0.0095506 | 0.0422430 | 0.0239731 | CYBB/C3AR1                                 | 2 |

Supplementary Table2. The details for actual gene IDs and GO descriptions

|    |          |                                                                    |      |         |           |           |           |                          |   |
|----|----------|--------------------------------------------------------------------|------|---------|-----------|-----------|-----------|--------------------------|---|
|    | 79       | membrane                                                           |      | 7       | 06        | 63        | 8         |                          |   |
| CC | GO:00198 | extrinsic component of                                             | 3/32 | 295/197 | 0.0119345 | 0.0490170 | 0.0278174 |                          |   |
|    | 98       | membrane                                                           |      | 17      | 88        | 57        | 6         | LYN/S100A6/S100A10       | 3 |
| CC | GO:00988 | plasma membrane                                                    | 3/32 | 295/197 | 0.0119345 | 0.0490170 | 0.0278174 |                          |   |
|    | 02       | receptor complex                                                   |      | 17      | 88        | 57        | 6         | LYN/TLR2/PTPN6           | 3 |
| MF | GO:00198 | IgG binding                                                        | 3/32 | 11/1769 |           | 0.0001123 |           |                          |   |
|    | 64       |                                                                    |      | 7       | 8.77E-07  |           | 6.47E-05  | FCER1G/FCGR2B/FCGR3A     | 3 |
| MF | GO:00083 | signaling pattern<br>recognition receptor                          | 3/32 | 20/1769 |           | 0.0002980 | 0.0001715 |                          |   |
|    | 29       | activity                                                           |      | 7       | 6.00E-06  |           |           | TLR4/TLR2/CD14           | 3 |
| MF | GO:00381 | pattern recognition<br>receptor activity                           | 3/32 | 21/1769 |           | 0.0002980 | 0.0001715 |                          |   |
|    | 87       |                                                                    |      | 7       | 6.99E-06  |           |           | TLR4/TLR2/CD14           | 3 |
| MF | GO:00198 | immunoglobulin binding                                             | 3/32 | 24/1769 |           | 0.0003389 | 0.0001951 |                          |   |
|    | 65       |                                                                    |      | 7       | 1.06E-05  |           |           | FCER1G/FCGR2B/FCGR3A     | 3 |
| MF | GO:00015 | lipopolysaccharide<br>binding                                      | 3/32 | 35/1769 |           | 0.0008651 | 0.0004980 |                          |   |
|    | 30       |                                                                    |      | 7       | 3.38E-05  |           |           | TLR4/TLR2/CD14           | 3 |
| MF | GO:00016 | G protein-coupled<br>receptor binding                              | 5/32 | 280/176 | 0.0001357 | 0.0025830 | 0.0014869 |                          |   |
|    | 64       |                                                                    |      | 97      | 51        | 54        | 56        | AGT/S1PR1/STAT3/PF4/CCL2 | 5 |
| MF | GO:00717 | lipopeptide binding                                                | 2/32 | 10/1769 | 0.0001412 | 0.0025830 | 0.0014869 |                          |   |
|    | 23       |                                                                    |      | 7       | 61        | 54        | 56        | TLR2/CD14                | 2 |
| MF | GO:00423 | chemokine receptor<br>binding                                      | 3/32 | 66/1769 | 0.0002274 | 0.0036391 | 0.0020949 |                          |   |
|    | 79       |                                                                    |      | 7       | 47        | 48        | 04        | STAT3/PF4/CCL2           | 3 |
| MF | GO:00445 | S100 protein binding                                               | 2/32 | 15/1769 | 0.0003277 | 0.0045179 |           |                          |   |
|    | 48       |                                                                    |      | 7       | 52        | 61        | 0.0026008 | S100A6/S100A11           | 2 |
| MF | GO:00015 | amyloid-beta binding                                               | 3/32 | 78/1769 | 0.0003726 | 0.0045179 |           |                          |   |
|    | 40       |                                                                    |      | 7       | 04        | 61        | 0.0026008 | TLR4/TLR2/FCGR2B         | 3 |
| MF | GO:00050 | transmembrane receptor<br>protein tyrosine<br>phosphatase activity | 2/32 | 17/1769 | 0.0004235 | 0.0045179 |           |                          |   |
|    | 01       |                                                                    |      | 7       | 59        | 61        | 0.0026008 | PTPRC/PTPN6              | 2 |
| MF | GO:00191 | transmembrane receptor<br>protein phosphatase<br>activity          | 2/32 | 17/1769 | 0.0004235 | 0.0045179 |           |                          |   |
|    | 98       |                                                                    |      | 7       | 59        | 61        | 0.0026008 | PTPRC/PTPN6              | 2 |
| MF | GO:00466 | sphingolipid binding                                               | 2/32 | 23/1769 | 0.0007826 | 0.0077058 | 0.0044359 |                          |   |
|    | 25       |                                                                    |      | 7       | 25        | 45        | 31        | S1PR1/LYN                | 2 |
| MF | GO:00480 | receptor ligand activity                                           | 5/32 | 482/176 | 0.0016095 | 0.0147163 | 0.0084715 |                          |   |
|    | 18       |                                                                    |      | 97      | 96        | 08        | 59        | AGT/GRN/GMFG/PF4/CCL2    | 5 |
| MF | GO:00422 | peptide binding                                                    | 4/32 | 295/176 | 0.0018830 | 0.0153637 | 0.0088442 |                          |   |
|    | 77       |                                                                    |      | 97      | 89        | 07        | 39        | TLR4/TLR2/FCGR2B/CD14    | 4 |
| MF | GO:00433 | proteoglycan binding                                               | 2/32 | 36/1769 | 0.0019204 | 0.0153637 | 0.0088442 |                          |   |
|    | 94       |                                                                    |      | 7       | 63        | 07        | 39        | CTSB/PTPRC               | 2 |
| MF | GO:00480 | CCR chemokine receptor<br>binding                                  | 2/32 | 43/1769 | 0.0027310 | 0.0205631 | 0.0118373 |                          |   |
|    | 20       |                                                                    |      | 7       | 39        | 2         | 22        | STAT3/CCL2               | 2 |
| MF | GO:00080 | growth factor activity                                             | 3/32 | 163/176 | 0.0031273 | 0.0222391 | 0.0128021 |                          |   |
|    | 83       |                                                                    |      | 97      | 79        | 4         | 36        | AGT/GRN/GMFG             | 3 |

Supplementary Table2. The details for actual gene IDs and GO descriptions

|    |            |                                   |      |         |           |           |           |                       |   |
|----|------------|-----------------------------------|------|---------|-----------|-----------|-----------|-----------------------|---|
| MF | GO:0008009 | chemokine activity                | 2/32 | 49/1769 | 0.0035327 | 0.0237481 | 0.0136707 | PF4/CCL2              | 2 |
|    |            |                                   |      | 7       | 55        | 1         | 87        |                       |   |
| MF | GO:0033218 | amide binding                     | 4/32 | 356/176 | 0.0037106 | 0.0237481 | 0.0136707 | TLR4/TLR2/FCGR2B/CD14 | 4 |
|    |            |                                   |      | 97      | 42        | 1         | 87        |                       |   |
| MF | GO:0048306 | calcium-dependent protein binding | 2/32 | 61/1769 | 0.0054236 | 0.0330586 | 0.0190304 | S100A6/S100A11        | 2 |
|    |            |                                   |      | 7       | 88        | 69        | 84        |                       |   |
| MF | GO:0005125 | cytokine activity                 | 3/32 | 220/176 | 0.0072070 | 0.0419320 | 0.0241385 | GRN/PF4/CCL2          | 3 |
|    |            |                                   |      | 97      | 67        | 28        | 03        |                       |   |
| MF | GO:0005539 | glycosaminoglycan binding         | 3/32 | 229/176 | 0.0080439 | 0.0447661 | 0.0257699 | PTPRC/TLR2/PF4        | 3 |
|    |            |                                   |      | 97      | 15        | 35        | 79        |                       |   |

Supplementary Table3. The details for actual gene IDs per pathway

| ID       | Description                       | GeneRatio | BgRatio  | pvalue      | p.adjust    | qvalue      | geneID                                       | Count |
|----------|-----------------------------------|-----------|----------|-------------|-------------|-------------|----------------------------------------------|-------|
| hsa05152 | Tuberculosis                      | 7/28      | 180/8102 | 1.90E-06    | 0.000206814 | 0.000117837 | FCER1G/TLR4/TLR2/TNFRSF1A/FCGR2B/FCGR3A/CD14 | 7     |
| hsa05140 | Leishmaniasis                     | 5/28      | 77/8102  | 5.63E-06    | 0.000288306 | 0.000164269 | TLR4/TLR2/PTPN6/CYBB/FCGR3A                  | 5     |
|          | Coronavirus                       |           |          |             |             |             |                                              |       |
| hsa05171 | disease - COVID-19                | 7/28      | 232/8102 | 1.02E-05    | 0.000288306 | 0.000164269 | STAT3/TLR4/TLR2/TNFRSF1A/CYBB/C3AR1/CCL2     | 7     |
| hsa04145 | Phagosome                         | 6/28      | 152/8102 | 1.06E-05    | 0.000288306 | 0.000164269 | TLR4/TLR2/CYBB/FCGR2B/FCGR3A/CD14            | 6     |
| hsa04380 | Osteoclast differentiation        | 5/28      | 128/8102 | 6.68E-05    | 0.001355675 | 0.000772427 | TYROBP/TNFRSF1A/LCP2/FCGR2B/FCGR3A           | 5     |
|          | Natural killer                    |           |          |             |             |             |                                              |       |
| hsa04650 | cell mediated cytotoxicity        | 5/28      | 131/8102 | 7.46E-05    | 0.001355675 | 0.000772427 | FCER1G/TYROBP/LCP2/PTPN6/FCGR3A              | 5     |
| hsa05132 | Salmonella infection              | 6/28      | 249/8102 | 0.000169173 | 0.002634273 | 0.001500938 | PTPRC/TLR4/TLR2/TNFRSF1A/S100A10/CD14        | 6     |
|          | PD-L1 expression and              |           |          |             |             |             |                                              |       |
| hsa05235 | PD-1 checkpoint pathway in cancer | 4/28      | 89/8102  | 0.000227737 | 0.003102916 | 0.001767958 | STAT3/TLR4/TLR2/PTPN6                        | 4     |
|          | Fc gamma                          |           |          |             |             |             |                                              |       |
| hsa04666 | R-mediated phagocytosis           | 4/28      | 97/8102  | 0.000317096 | 0.003759384 | 0.002141996 | LYN/PTPRC/FCGR2B/FCGR3A                      | 4     |
|          | AGE-RAGE signaling                |           |          |             |             |             |                                              |       |
| hsa04933 | pathway in diabetic complications | 4/28      | 100/8102 | 0.000356316 | 0.003759384 | 0.002141996 | AGT/STAT3/CYBB/CCL2                          | 4     |
| hsa05142 | Chagas disease                    | 4/28      | 102/8102 | 0.000384324 | 0.003759384 | 0.002141996 | TLR4/TLR2/TNFRSF1A/CCL2                      | 4     |
|          | NF-kappa B                        |           |          |             |             |             |                                              |       |
| hsa04064 | signaling pathway                 | 4/28      | 104/8102 | 0.000413877 | 0.003759384 | 0.002141996 | LYN/TLR4/TNFRSF1A/CD14                       | 4     |
|          | HIF-1                             |           |          |             |             |             |                                              |       |
| hsa04066 | signaling pathway                 | 4/28      | 109/8102 | 0.00049484  | 0.004149044 | 0.002364013 | STAT3/TLR4/CYBB/HMOX1                        | 4     |
| hsa05145 | Toxoplasmosis                     | 4/28      | 112/8102 | 0.00054852  | 0.004270621 | 0.002433285 | STAT3/TLR4/TLR2/TNFRSF1A                     | 4     |
| hsa05144 | Malaria                           | 3/28      | 50/8102  | 0.000649963 | 0.004723061 | 0.002691073 | TLR4/TLR2/CCL2                               | 3     |
| hsa05134 | Legionellosis                     | 3/28      | 57/8102  | 0.000954732 | 0.006504109 | 0.003705866 | TLR4/TLR2/CD14                               | 3     |
| hsa05162 | Measles                           | 4/28      | 139/8102 | 0.001233546 | 0.007909206 | 0.004506452 | STAT3/TLR4/TLR2/FCGR2B                       | 4     |
| hsa05321 | Inflammatory bowel disease        | 3/28      | 65/8102  | 0.001399151 | 0.008472636 | 0.00482748  | STAT3/TLR4/TLR2                              | 3     |
|          | Fc epsilon RI                     |           |          |             |             |             |                                              |       |
| hsa04664 | signaling pathway                 | 3/28      | 68/8102  | 0.001594226 | 0.009145825 | 0.005211045 | FCER1G/LYN/LCP2                              | 3     |
| hsa04217 | Necroptosis                       | 4/28      | 159/8102 | 0.002025205 | 0.011037365 | 0.006288793 | STAT3/TLR4/TNFRSF1A/CYBB                     | 4     |
| hsa04612 | Antigen                           | 3/28      | 78/8102  | 0.002364818 | 0.012274533 | 0.006993698 | LGMN/CTSB/IFI30                              | 3     |

|          |                                      |      |          |             |             |             |                       |   |
|----------|--------------------------------------|------|----------|-------------|-------------|-------------|-----------------------|---|
|          | processing and presentation          |      |          |             |             |             |                       |   |
|          | B cell receptor                      |      |          |             |             |             |                       |   |
| hsa04662 | signaling pathway                    | 3/28 | 82/8102  | 0.002727597 | 0.013514003 | 0.007699915 | LYN/PTPN6/FCGR2B      | 3 |
|          | NOD-like receptor                    |      |          |             |             |             |                       |   |
| hsa04621 | signaling pathway                    | 4/28 | 181/8102 | 0.003242997 | 0.015368985 | 0.008756833 | CTSB/TLR4/CYBB/CCL2   | 4 |
|          | Neutrophil                           |      |          |             |             |             |                       |   |
| hsa04613 | extracellular trap formation         | 4/28 | 190/8102 | 0.003860696 | 0.016803265 | 0.009574048 | TLR4/TLR2/CYBB/FCGR3A | 4 |
|          | Rheumatoid arthritis                 |      |          |             |             |             |                       |   |
| hsa05323 | Chemokine signaling pathway          | 3/28 | 93/8102  | 0.003896623 | 0.016803265 | 0.009574048 | TLR4/TLR2/CCL2        | 3 |
|          | Chemokine signaling pathway          |      |          |             |             |             |                       |   |
| hsa04062 | Staphylococcus aureus infection      | 4/28 | 192/8102 | 0.004008118 | 0.016803265 | 0.009574048 | LYN/STAT3/PF4/CCL2    | 4 |
|          | Staphylococcus aureus infection      |      |          |             |             |             |                       |   |
| hsa05150 | Viral protein interaction            | 3/28 | 96/8102  | 0.00426085  | 0.017201208 | 0.009800785 | C3AR1/FCGR2B/FCGR3A   | 3 |
|          | Viral protein interaction            |      |          |             |             |             |                       |   |
| hsa04061 | with cytokine and cytokine receptor  | 3/28 | 100/8102 | 0.004777846 | 0.017609731 | 0.01003355  | TNFRSF1A/PF4/CCL2     | 3 |
|          | Epstein-Barr virus infection         |      |          |             |             |             |                       |   |
| hsa05169 | Epstein-Barr virus infection         | 4/28 | 202/8102 | 0.00480309  | 0.017609731 | 0.01003355  | LYN/VIM/STAT3/TLR2    | 4 |
|          | Amoebiasis                           |      |          |             |             |             |                       |   |
| hsa05146 | Amoebiasis                           | 3/28 | 102/8102 | 0.005050002 | 0.017609731 | 0.01003355  | TLR4/TLR2/CD14        | 3 |
|          | Proteoglycans in cancer              |      |          |             |             |             |                       |   |
| hsa05205 | Proteoglycans in cancer              | 4/28 | 205/8102 | 0.005060947 | 0.017609731 | 0.01003355  | STAT3/TLR4/TLR2/PTPN6 | 4 |
|          | Toll-like receptor signaling pathway |      |          |             |             |             |                       |   |
| hsa04620 | Toll-like receptor signaling pathway | 3/28 | 104/8102 | 0.005331387 | 0.017609731 | 0.01003355  | TLR4/TLR2/CD14        | 3 |
|          | T cell receptor                      |      |          |             |             |             |                       |   |
| hsa04660 | signaling pathway                    | 3/28 | 104/8102 | 0.005331387 | 0.017609731 | 0.01003355  | PTPRC/LCP2/PTPN6      | 3 |
|          | Insulin resistance                   |      |          |             |             |             |                       |   |
| hsa04931 | Insulin resistance                   | 3/28 | 108/8102 | 0.005922192 | 0.018985851 | 0.010817626 | AGT/STAT3/TNFRSF1A    | 3 |
|          | Sphingolipid                         |      |          |             |             |             |                       |   |
| hsa04071 | signaling pathway                    | 3/28 | 119/8102 | 0.007744419 | 0.024118333 | 0.013741976 | S1PR1/FCER1G/TNFRSF1A | 3 |
|          | Platelet activation                  |      |          |             |             |             |                       |   |
| hsa04611 | Platelet activation                  | 3/28 | 124/8102 | 0.008670932 | 0.025601705 | 0.014587162 | FCER1G/LYN/LCP2       | 3 |
|          | Ferroptosis                          |      |          |             |             |             |                       |   |
| hsa04216 | Ferroptosis                          | 2/28 | 41/8102  | 0.008690487 | 0.025601705 | 0.014587162 | CYBB/HMOX1            | 2 |
|          | Yersinia infection                   |      |          |             |             |             |                       |   |
| hsa05135 | Yersinia infection                   | 3/28 | 137/8102 | 0.011376126 | 0.03263152  | 0.018592561 | TLR4/LCP2/CCL2        | 3 |

---

|                 |             |      |          |             |             |                                 |   |
|-----------------|-------------|------|----------|-------------|-------------|---------------------------------|---|
| Fluid shear     |             |      |          |             |             |                                 |   |
| hsa05418        | stress and  | 3/28 | 139/8102 | 0.011830964 | 0.033066027 | 0.018840131 TNFRSF1A/HMOX1/CCL2 | 3 |
| atherosclerosis |             |      |          |             |             |                                 |   |
| hsa05161        | Hepatitis B | 3/28 | 162/8102 | 0.017821347 | 0.048563169 | 0.027669985 STAT3/TLR4/TLR2     | 3 |

---

Supplementary Table4. Expression profile

**GSE114426**

|                  |             |             |             |             |             |             |
|------------------|-------------|-------------|-------------|-------------|-------------|-------------|
| Groups           | Control     | Control     | Control     | SCI         | SCI         | SCI         |
| Samples          | GSM3141545  | GSM3141546  | GSM3141547  | GSM3141548  | GSM3141549  | GSM3141550  |
| hsa_circ_0026646 | 6.423415612 | 5.950242761 | 6.154757261 | 7.276096435 | 6.634162375 | 7.732994944 |

**GSE19890**

|                |           |           |           |           |           |           |           |           |           |           |
|----------------|-----------|-----------|-----------|-----------|-----------|-----------|-----------|-----------|-----------|-----------|
| Groups         | Control   | Control   | Control   | Control   | Control   | SCI       | SCI       | SCI       | SCI       | SCI       |
| Samples        | GSM497216 | GSM497217 | GSM497218 | GSM497219 | GSM497220 | GSM497211 | GSM497212 | GSM497213 | GSM497214 | GSM497215 |
| hsa-miR-331-3p | 8.158     | 8.3795    | 8.04975   | 7.92725   | 8.12225   | 7.596     | 6.80175   | 7.56375   | 7.47925   | 7.59675   |

**GSE45006**

|         |            |            |            |            |            |            |            |            |
|---------|------------|------------|------------|------------|------------|------------|------------|------------|
| Groups  | Control    | Control    | Control    | Control    | SCI        | SCI        | SCI        | SCI        |
| Samples | GSM1095725 | GSM1095726 | GSM1095727 | GSM1095728 | GSM1095741 | GSM1095742 | GSM1095743 | GSM1095744 |
| Plxnb2  | 7.9741355  | 8.7951538  | 8.2742306  | 8.8863489  | 9.2038751  | 9.2631006  | 9.5621571  | 9.2318931  |

**GSE20907**

|         |             |             |            |            |             |             |             |             |
|---------|-------------|-------------|------------|------------|-------------|-------------|-------------|-------------|
| Groups  | Control     | Control     | Control    | Control    | SCI         | SCI         | SCI         | SCI         |
| Samples | GSM523055   | GSM523056   | GSM523057  | GSM523058  | GSM523051   | GSM523052   | GSM523053   | GSM523054   |
| Plxnb2  | 7.390165946 | 7.485844923 | 6.32288032 | 7.26818668 | 8.124178088 | 8.191373537 | 7.543543905 | 7.840006371 |
